# Supplementary material
Source: PubMed Central journal article supplement (PMC3778977)
Supplement: mmc1.pdf [file mmc1.pdf]

# THE LANCET

## **Supplementary appendix**

This appendix formed part of the original submission and has been peer reviewed. We post it as supplied by the authors.

Supplement to: Coxib and traditional NSAID Trialists' (CNT) Collaboration. Vascular and upper gastrointestinal effects of non-steroidal anti-inflammatory drugs: meta-analyses of individual participant data from randomised trials. *Lancet* 2013; published online May 30. [http://dx.doi.org/10.1016/S0140-6736\(13\)60900-9](http://dx.doi.org/10.1016/S0140-6736(13)60900-9).

# Webmaterial: Vascular and upper gastrointestinal effect of non-steroidal anti-inflammatory drugs: meta-analyses of individual participant data from randomised trials

| <b>Webtables</b>                                                                                                      | <b>Pg</b> |
|-----------------------------------------------------------------------------------------------------------------------|-----------|
| 1. Dose range and pharmacological properties of the main NSAIDs studied in randomised trials                          | 1         |
| 2. Baseline characteristics of trials that supplied individual patient data, overall and by comparison type           | 2         |
| 3. Effect of coxibs and tNSAIDs on major vascular events and upper GI complications                                   | 3         |
| <br>                                                                                                                  |           |
| <b>Webfigures</b>                                                                                                     |           |
| 1. PRISMA flow diagram                                                                                                | 4         |
| <br>                                                                                                                  |           |
| <i>Effect of NSAIDs by baseline characteristics</i>                                                                   |           |
| 2. Effect of coxib therapy on major vascular events, by baseline characteristics                                      | 5         |
| 3. Comparisons of coxibs vs non-naproxen NSAIDs. Effect on major vascular events by baseline characteristics          | 6         |
| 4. Comparisons of coxibs vs naproxen. Effect on major vascular events by baseline characteristics                     | 7         |
| 5. Effect of non-naproxen tNSAIDs on major vascular events, by baseline characteristics                               | 8         |
| 6. Effect of naproxen on major vascular events, by baseline characteristics                                           | 9         |
| 7. Effect of coxib therapy on any symptomatic upper GI event, by baseline characteristics                             | 10        |
| 8. Comparisons of coxibs vs non-naproxen NSAIDs. Effect on any symptomatic upper GI event by baseline characteristics | 11        |
| 9. Comparisons of coxibs vs naproxen. Effect on any symptomatic upper GI event by baseline characteristics            | 12        |
| 10. Effect of non-naproxen tNSAIDs on any symptomatic upper GI event, by baseline characteristics                     | 13        |
| 11. Effect of naproxen on any symptomatic upper GI event, by baseline characteristics                                 | 14        |
| <br>                                                                                                                  |           |
| <i>Effect of NSAIDs by duration of treatment</i>                                                                      |           |
| 12. Effect of coxibs, non-naproxen tNSAIDs and naproxen on major vascular events, by duration of treatment            | 15        |
| 13. Effect of coxibs, non-naproxen tNSAIDs and naproxen on any symptomatic upper GI event, by duration of treatment   | 16        |
| <br>                                                                                                                  |           |
| <i>Effect of coxibs by type and dose</i>                                                                              |           |
| 14. Effect of coxib therapy on major vascular events, by type of coxib                                                | 17        |
| 15. Effect of different coxib regimens on major vascular events, by dose: trials of a coxib vs placebo                | 18        |
| 16. Effect of different coxib regimens on major vascular events, by dose: trials of a coxib vs diclofenac             | 19        |
| 17. Effect of different coxib regimens on major vascular events, by dose: trials of a coxib vs ibuprofen              | 20        |
| 18. Effect of different coxib regimens on major vascular events, by dose: trials of a coxib vs naproxen               | 21        |
| 19. Effect of coxib therapy on any symptomatic upper GI event, by type of coxib                                       | 22        |
| 20. Effect of different coxib regimens on any symptomatic upper GI event, by dose: trials of a coxib vs placebo       | 23        |
| 21. Effect of different coxib regimens on any symptomatic upper GI event, by dose: trials of a coxib vs diclofenac    | 24        |
| 22. Effect of different coxib regimens on any symptomatic upper GI event, by dose: trials of a coxib vs ibuprofen     | 25        |
| 23. Effect of different coxib regimens on any symptomatic upper GI event, by dose: trials of a coxib vs naproxen      | 26        |
| <br>                                                                                                                  |           |
| <b>Electronic search strategy</b>                                                                                     | 27        |
| <br>                                                                                                                  |           |
| <b>Statistical appendix</b>                                                                                           | 28        |

**Webtable 1: Dose range and pharmacological properties of the main NSAIDs studied in randomised trials**

## (a) Traditional NSAIDs

|                    | <b>DICLOFENAC</b>    | <b>IBUPROFEN</b> | <b>NAPROXEN</b>       |
|--------------------|----------------------|------------------|-----------------------|
| Daily dose studied | 150mg (rarely 100mg) | 2400mg           | 1000mg (rarely 440mg) |
| Half life          | 1 to 2 hours         | 2 to 4 hours     | 14 hours              |
| COX1:COX2 IC50*    | 29                   | 0.5              | 0.7                   |
| Excretion          | Biliary              | Renal            | Renal                 |

## (b) Coxibs

|                                           | <b>CELECOXIB</b>     | <b>ROFECOXIB</b>     | <b>LUMIRACOXIB</b>   | <b>ETORICOXIB</b>    | <b>VALDECOXIB</b> |
|-------------------------------------------|----------------------|----------------------|----------------------|----------------------|-------------------|
| Daily dose studied<br>(typical dose[s] †) | 100-800mg<br>(400mg) | 12.5-125mg<br>(25mg) | 100-800mg<br>(200mg) | 5-120mg<br>(60/90mg) | 1-80mg<br>(20mg)  |
| Half life                                 | 6 to 12 hours        | 17 hours             | 4 hours              | 22 hours             | 10 hours          |
| COX1:COX2 IC50*                           | 30                   | 267                  | 515                  | 344                  | 62                |
| Excretion                                 | Renal and Faecal     | Renal and Biliary    | Renal and Faecal     | Renal and Faecal     | Mainly Renal      |

\* COX-1:COX-2 IC50 refers to the ratio of half maximal inhibitory concentrations for COX-1 and COX-2, and is a measure of COX-2 selectivity (with higher numbers implying greater COX-2 selectivity)

† Defined as the dose or doses contributing the majority of information on major vascular events

**Webtable 2: Baseline characteristics of trials that supplied individual patient data, overall and by comparison type**

|                                  | Overall     | Coxib vs placebo | tNSAID vs placebo | Coxib vs naproxen | Coxib vs other tNSAID |
|----------------------------------|-------------|------------------|-------------------|-------------------|-----------------------|
| No. randomised                   | 192981      | 73635            | 18018             | 42222             | 84680                 |
| No. trials                       | 157         | 113              | 47                | 34                | 54                    |
| Age, years                       | 61.2 (11.3) | 60.1 (12.4)      | 59.7 (13.6)       | 60.6 (11.3)       | 61.6 (10.6)           |
| Female, %                        | 68          | 59               | 67                | 73                | 73                    |
| Caucasian, %                     | 79          | 82               | 72                | 76                | 77                    |
| Indication for treatment, %      |             |                  |                   |                   |                       |
| Rheumatoid arthritis             | 20          | 20               | 28                | 36                | 17                    |
| Osteoarthritis                   | 63          | 44               | 52                | 57                | 77                    |
| Cancer prevention/treatment      | 7           | 19               | 0                 | 0                 | 0                     |
| Alzheimers                       | 3           | 7                | 11                | 4                 | 0                     |
| Other known indication           | 5           | 10               | 9                 | 2                 | 4                     |
| Unknown                          | 1           | 0                | 0                 | 1                 | 2                     |
| Prior disease, %                 |             |                  |                   |                   |                       |
| Diabetes                         | 9           | 8                | 6                 | 9                 | 8                     |
| Atherosclerotic disease          | 9           | 10               | 9                 | 8                 | 9                     |
| Upper GI ulcer                   | 7           | 7                | 9                 | 7                 | 7                     |
| Medication, %                    |             |                  |                   |                   |                       |
| Aspirin                          | 20          | 14               | 15                | 14                | 27                    |
| Proton pump inhibitor            | 17          | 5                | 3                 | 2                 | 33                    |
| Other/multiple gastroprotectants | 3           | 5                | 5                 | 6                 | 1                     |
| Current smoker, %                | 13          | 14               | 13                | 15                | 12                    |
| Physical measurements            |             |                  |                   |                   |                       |
| BMI, kg/m <sup>2</sup>           | 29.3 (6.2)  | 29.2 (6.3)       | 28.9 (6.5)        | 29.1 (6.4)        | 29.3 (6.1)            |
| Systolic blood pressure, mmHg    | 132 (16)    | 131 (16)         | 131 (17)          | 132 (17)          | 132 (16)              |
| Diastolic blood pressure, mmHg   | 79 (9)      | 79 (9)           | 79 (9)            | 79 (9)            | 79 (9)                |
| Laboratory measurements          |             |                  |                   |                   |                       |
| Total cholesterol, mmol/L        | 5.3 (1.0)   | 5.3 (1.0)        | 5.2 (0.8)         | 5.2 (0.8)         | 5.4 (1.0)             |
| Creatinine, umol/L               | 79 (21)     | 81 (19)          | 80 (19)           | 76 (20)           | 79 (23)               |
| Haemoglobin, g/dL                | 13.7 (1.3)  | 13.9 (1.4)       | 13.7 (1.3)        | 13.6 (1.3)        | 13.6 (1.3)            |

Mean (SD) or % shown

**Webtable 3: Effects of coxibs and tNSAIDs on major vascular events and upper GI complications**

| NSAID                         | Summary RR (95% CI) for comparison |                   |
|-------------------------------|------------------------------------|-------------------|
|                               | Coxib vs NSAID                     | NSAID vs placebo  |
| <b>Major vascular events</b>  |                                    |                   |
| Coxib                         | -                                  | 1.37 (1.14, 1.66) |
| Naproxen                      | 1.49 (1.16, 1.92)                  | 0.93 (0.69, 1.27) |
| Other tNSAID                  | 0.98 (0.86, 1.13)                  | 1.38 (1.10, 1.72) |
| Diclofenac                    | 0.97 (0.84, 1.12)                  | 1.41 (1.12, 1.78) |
| Ibuprofen                     | 0.92 (0.58, 1.46)                  | 1.44 (0.89, 2.33) |
| Other regimen                 | NE                                 | 0.93 (0.32, 2.70) |
| <b>Upper GI complications</b> |                                    |                   |
| Coxib                         | -                                  | 1.81 (1.17, 2.81) |
| Naproxen                      | 0.37 (0.28, 0.49)                  | 4.22 (2.71, 6.56) |
| Other tNSAID                  | 0.75 (0.59, 0.94)                  | 2.24 (1.46, 3.43) |
| Diclofenac                    | 0.94 (0.72, 1.24)                  | 1.89 (1.16, 3.09) |
| Ibuprofen                     | 0.40 (0.25, 0.64)                  | 3.97 (2.22, 7.10) |
| Other regimen                 | NE                                 | 2.66 (0.89, 7.99) |

**Webfigure 1: PRISMA flow diagram**

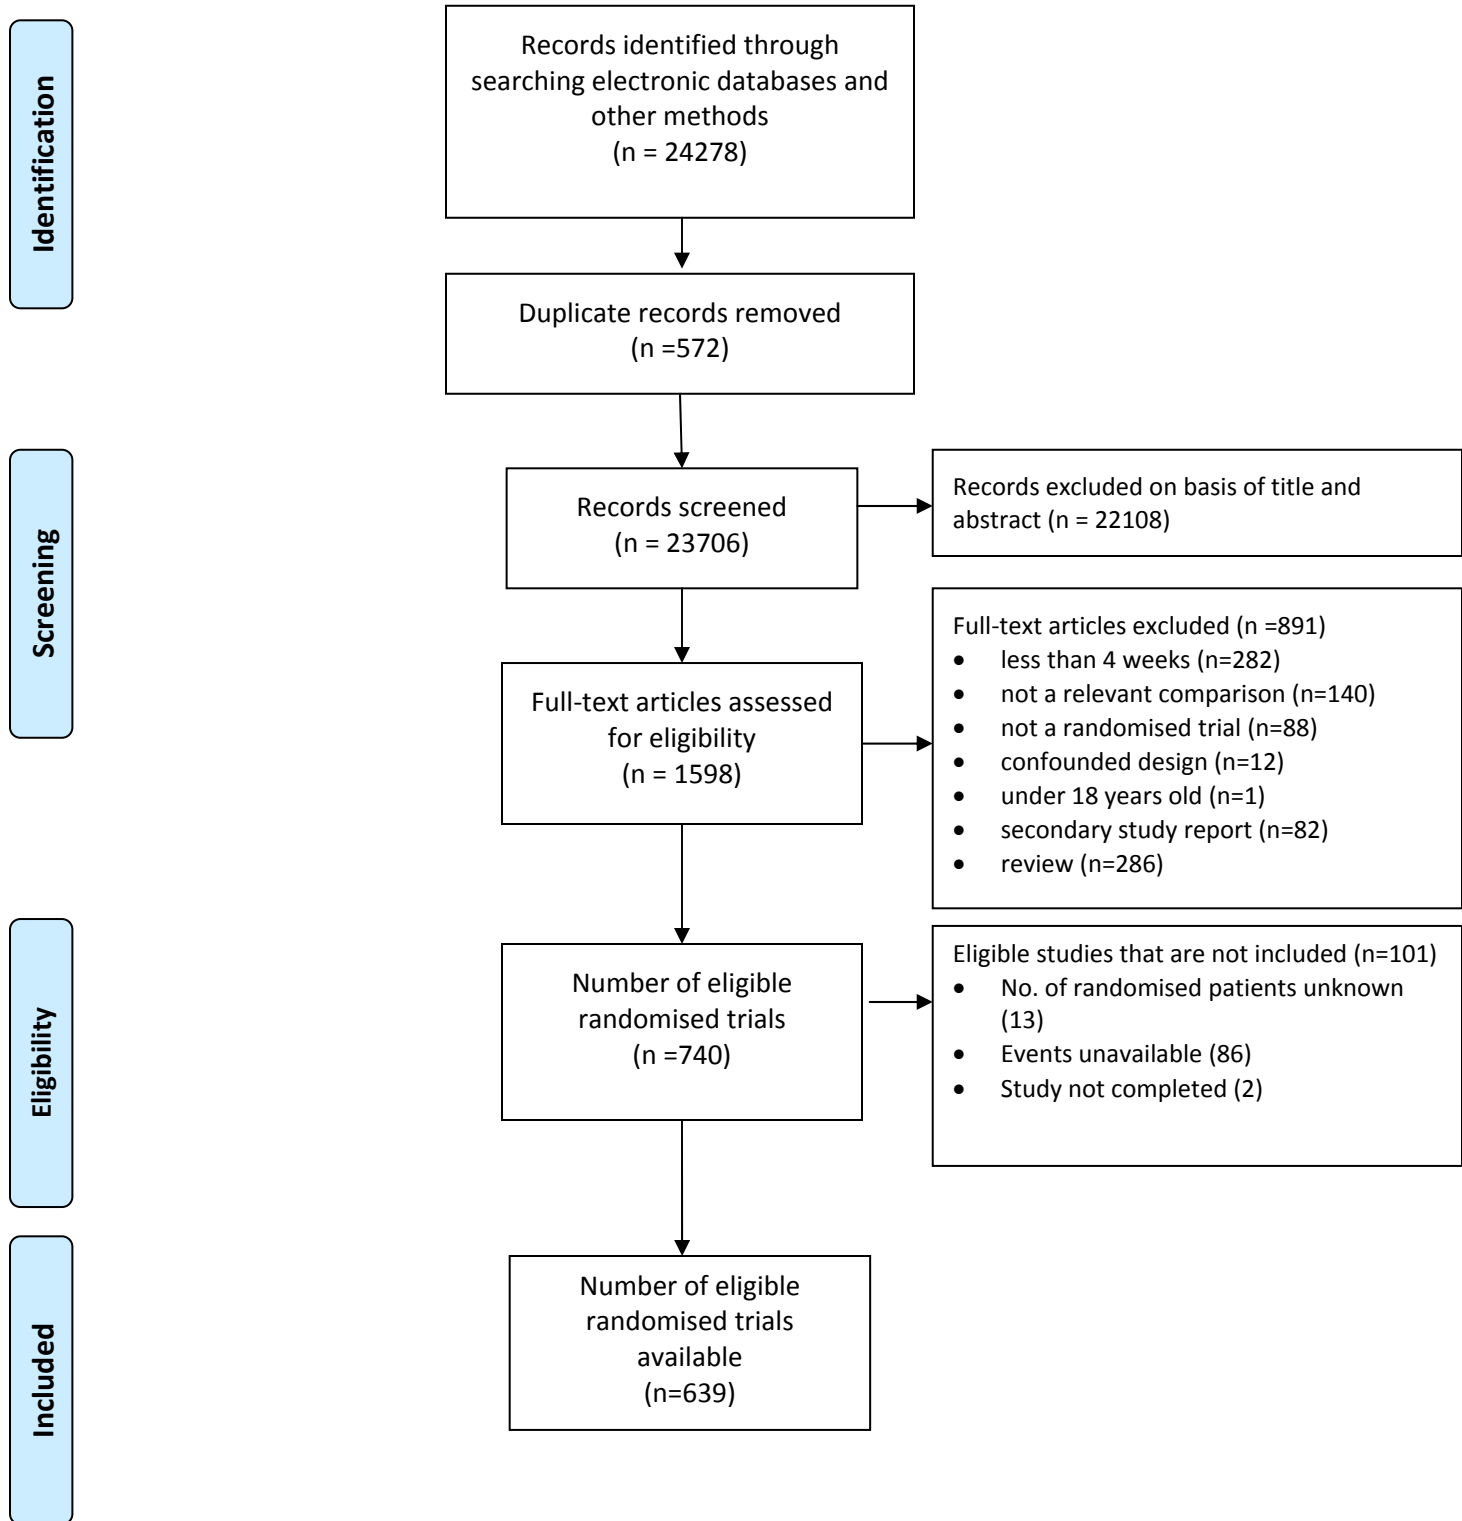

**Webfigure 2: Effect of coxib therapy on major vascular events, by baseline characteristics**

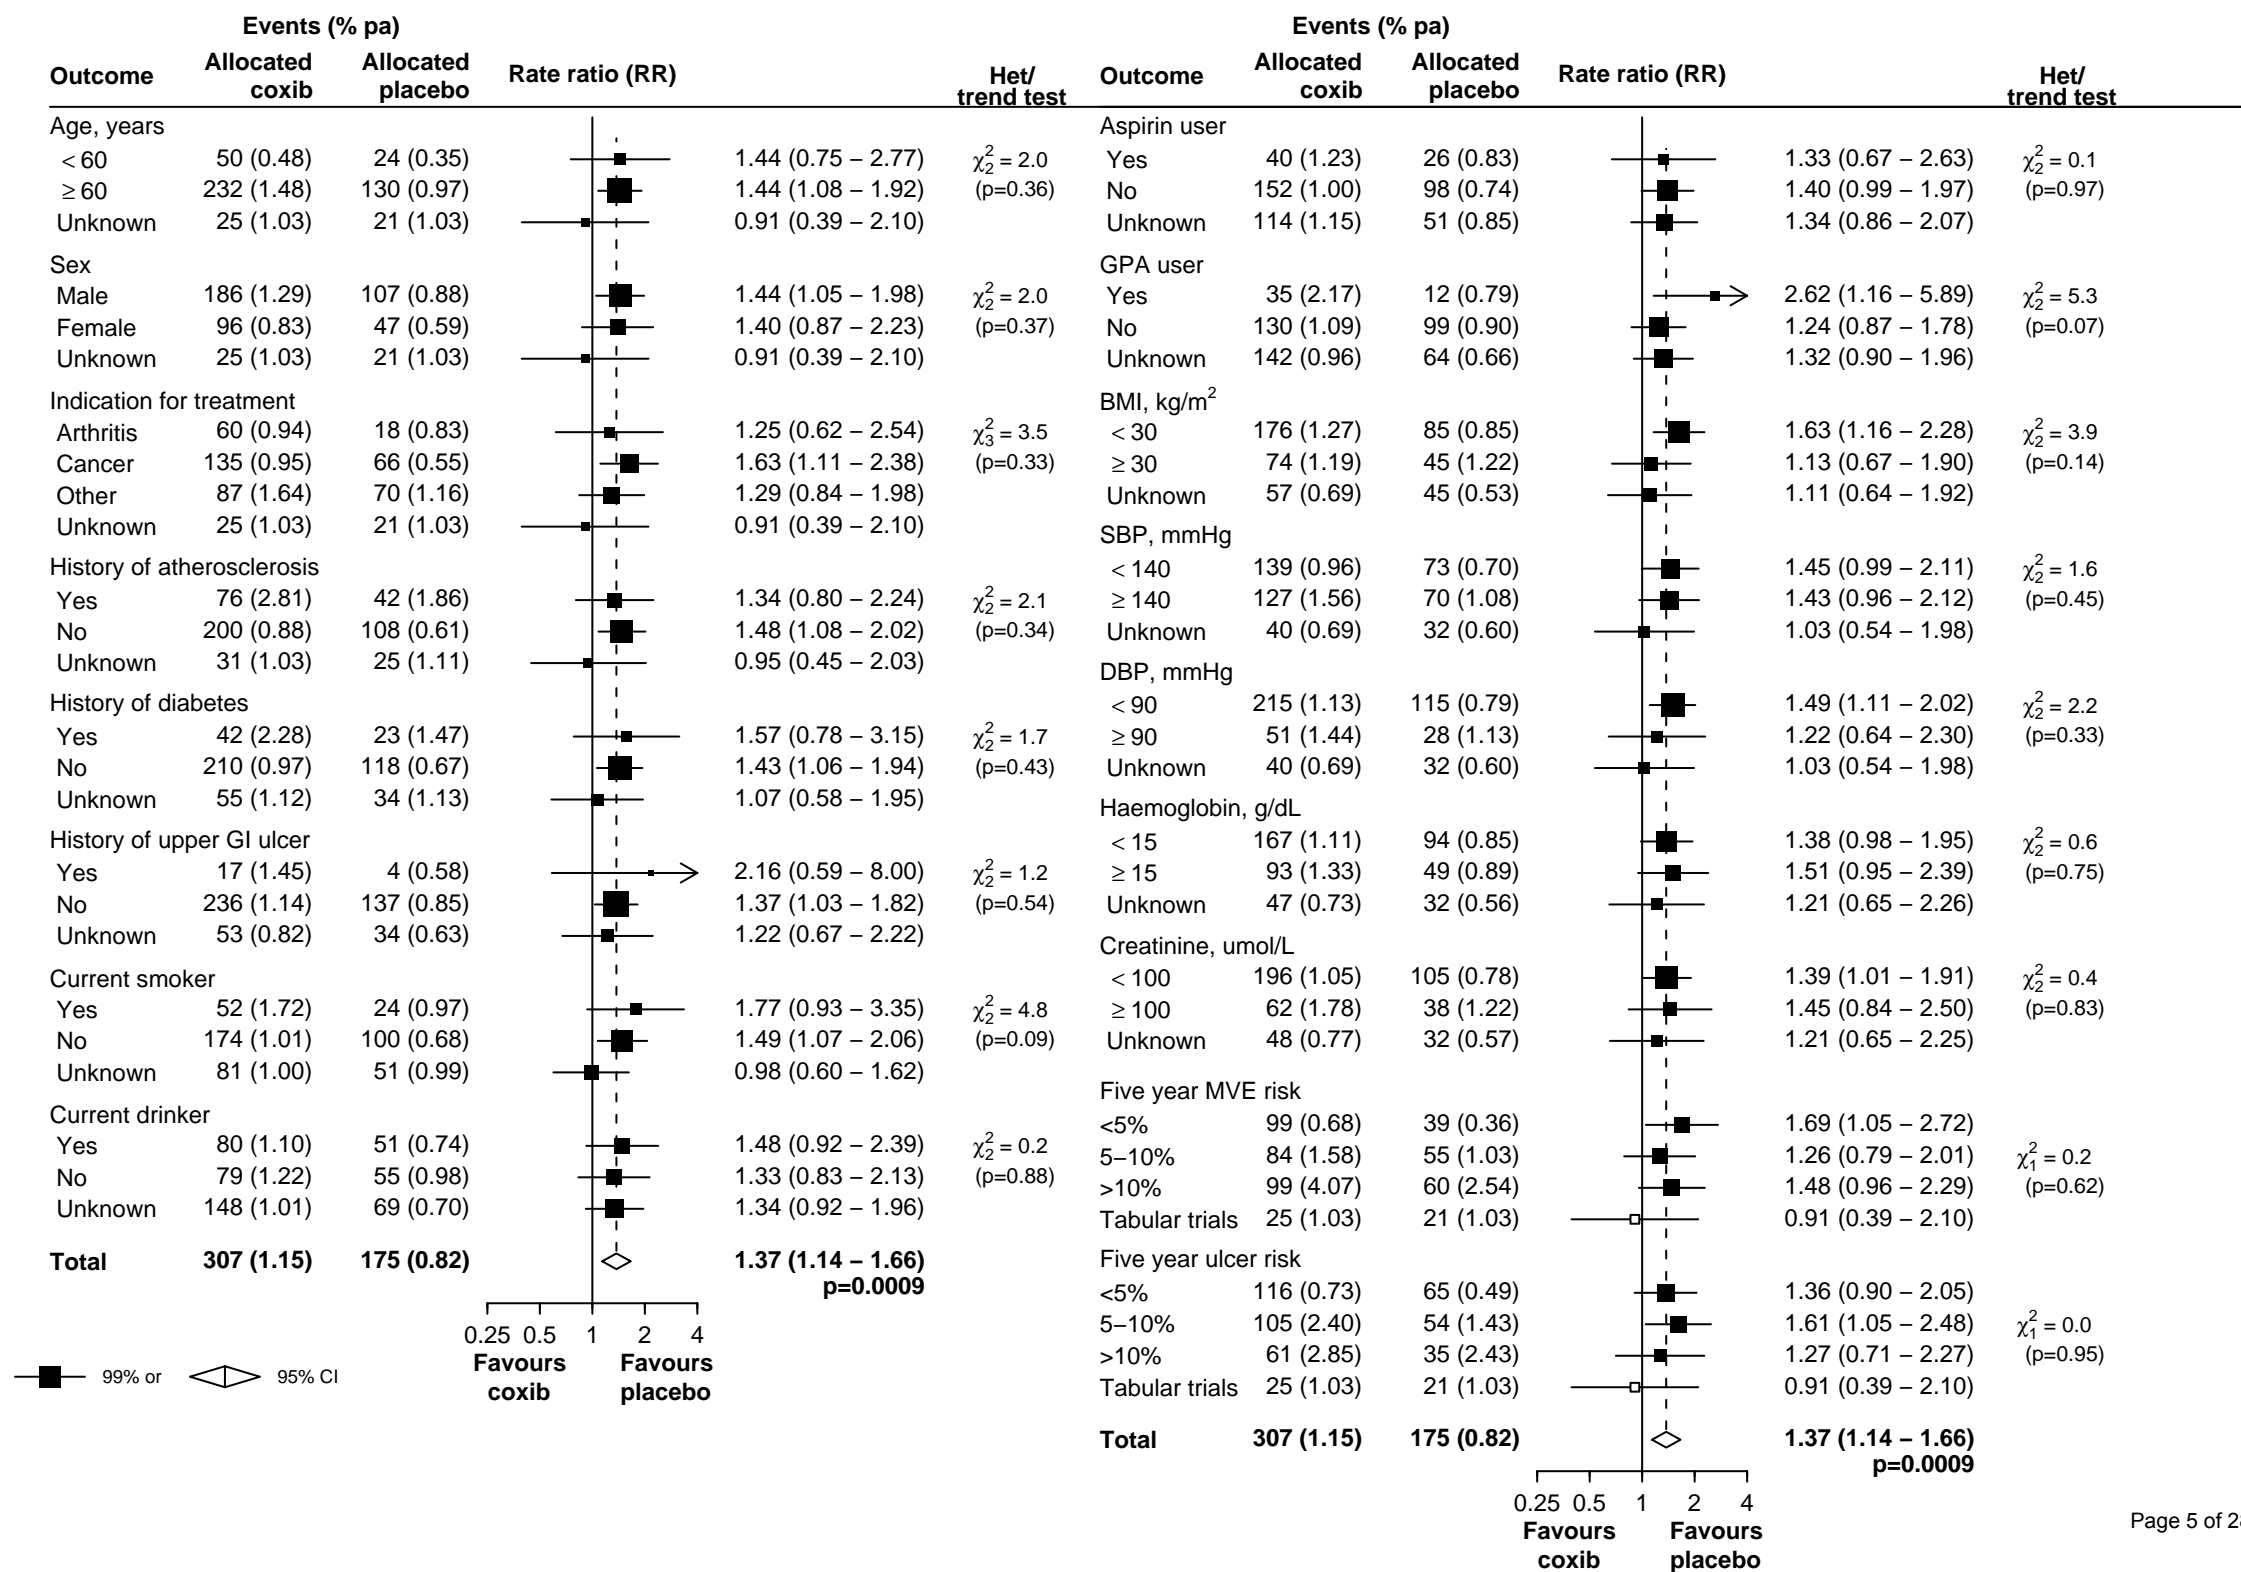

**Webfigure 3: Comparisons of coxibs vs non-naproxen NSAIDs. Effect on major vascular events by baseline characteristics**

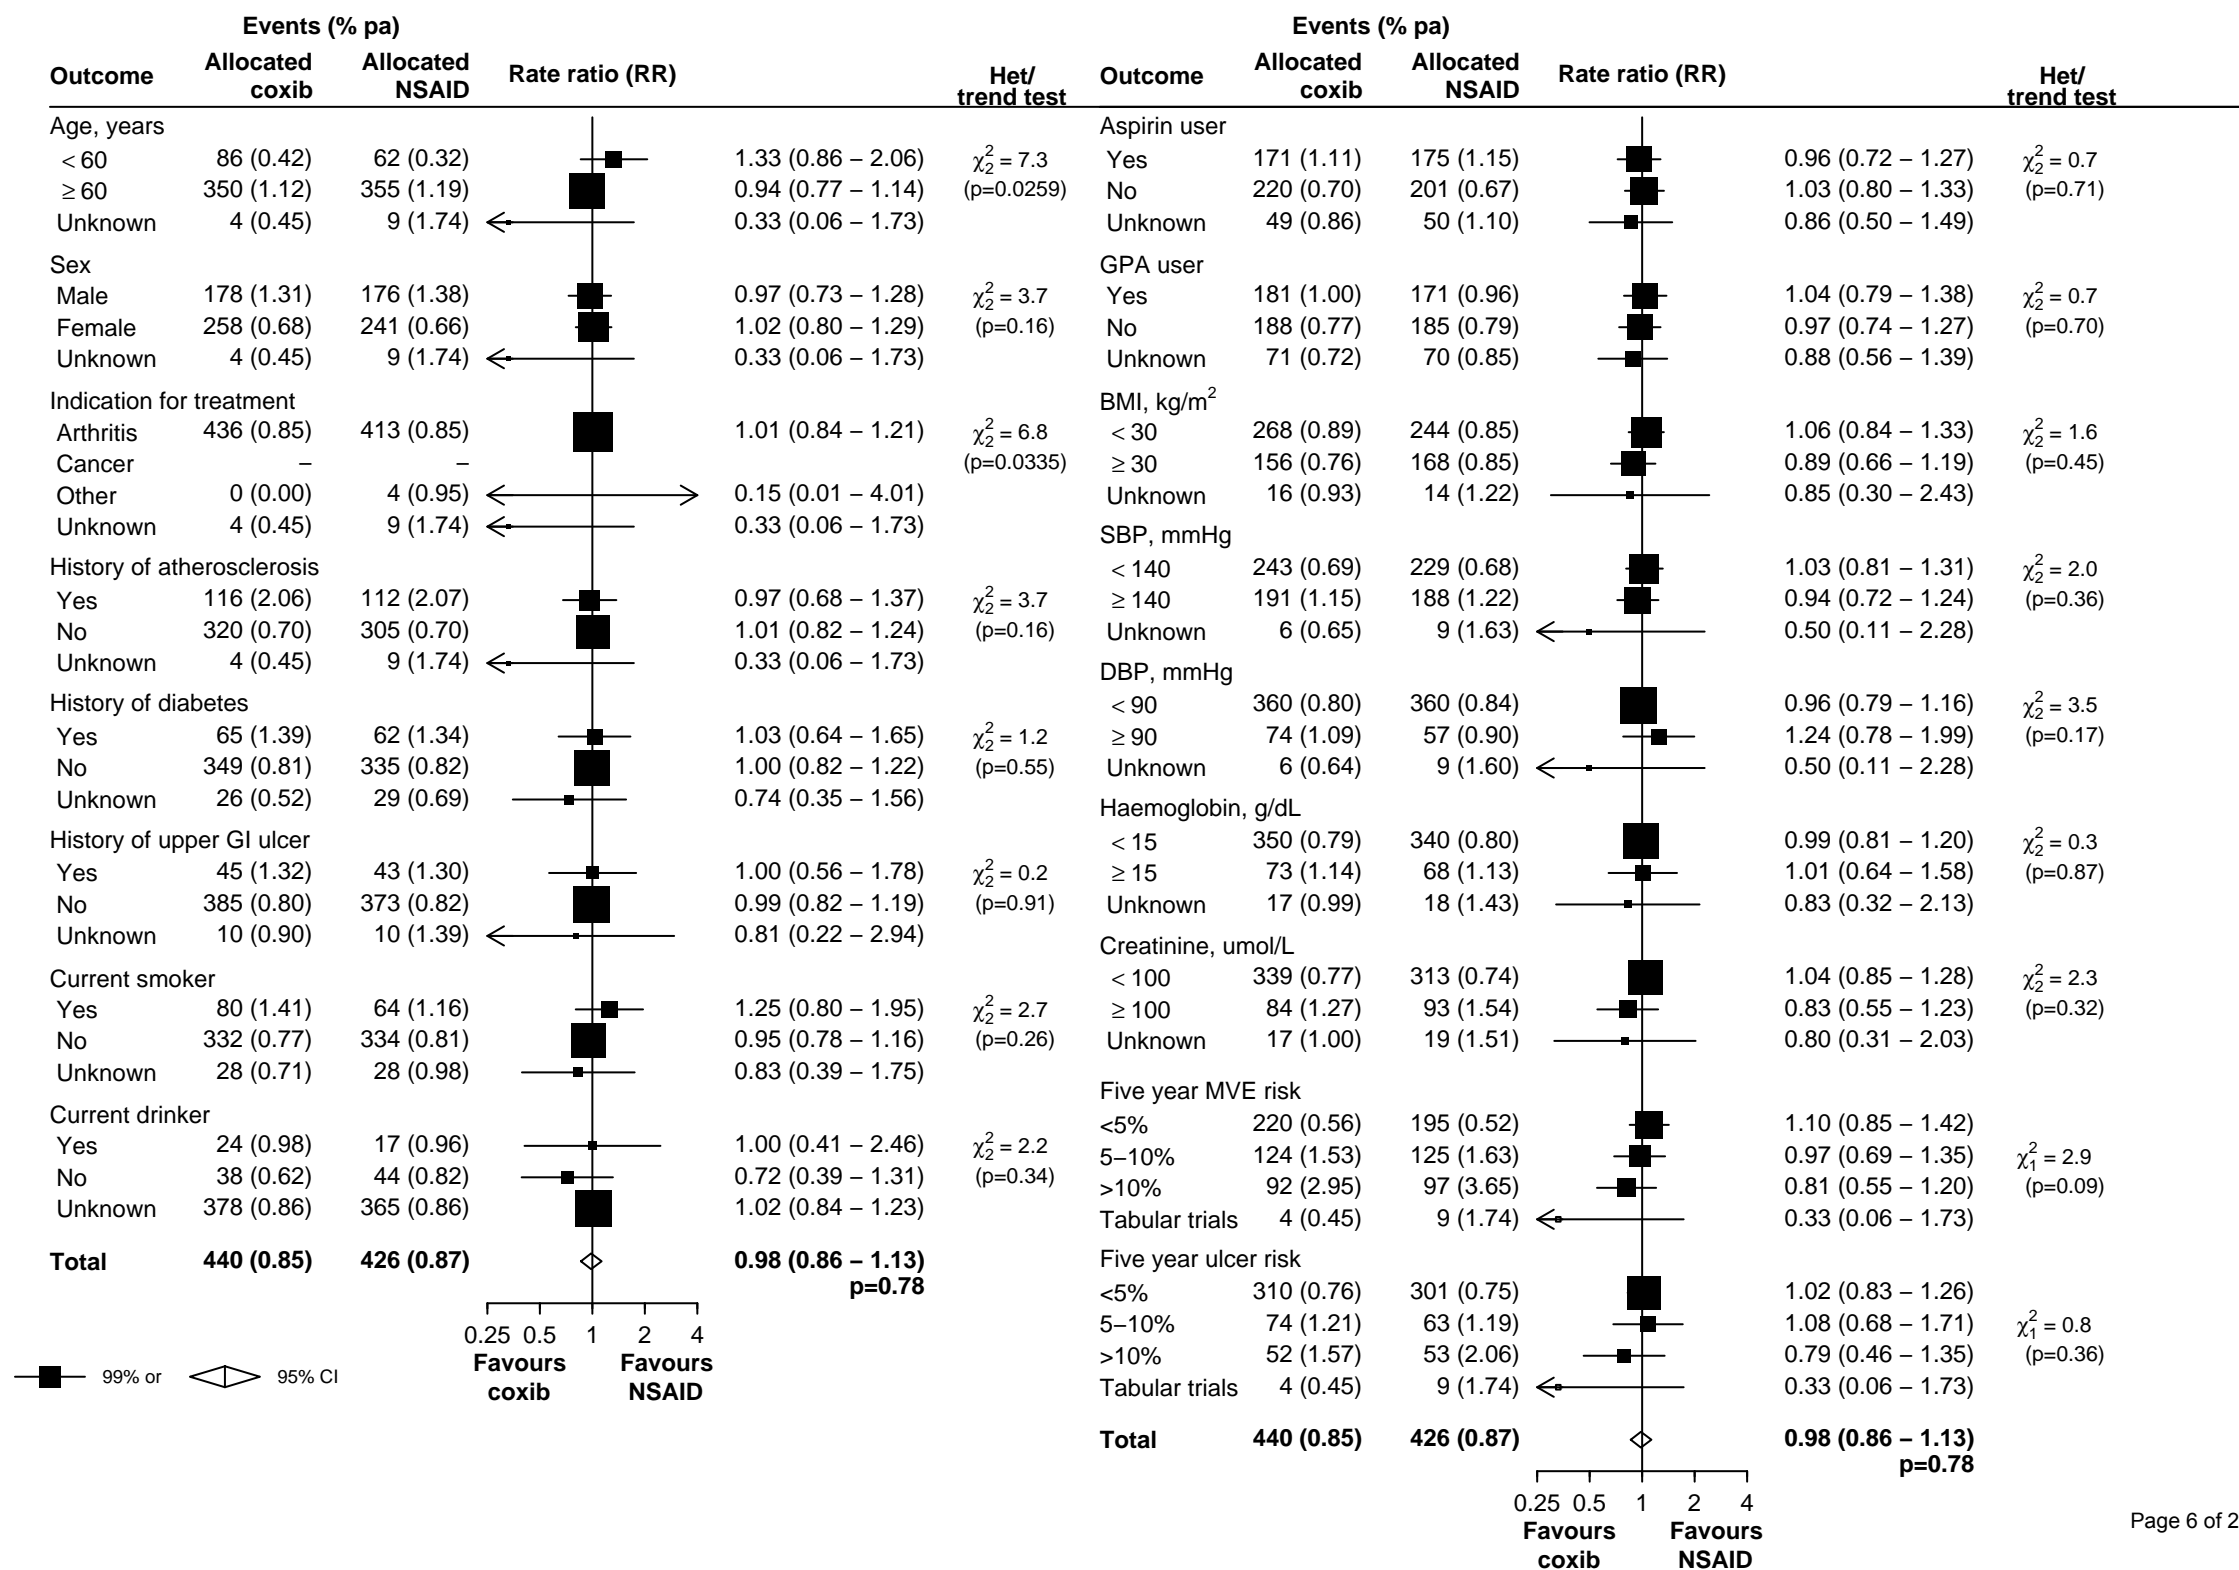



**Webfigure 4: Comparisons of coxibs vs naproxen. Effect on major vascular events by baseline characteristics**

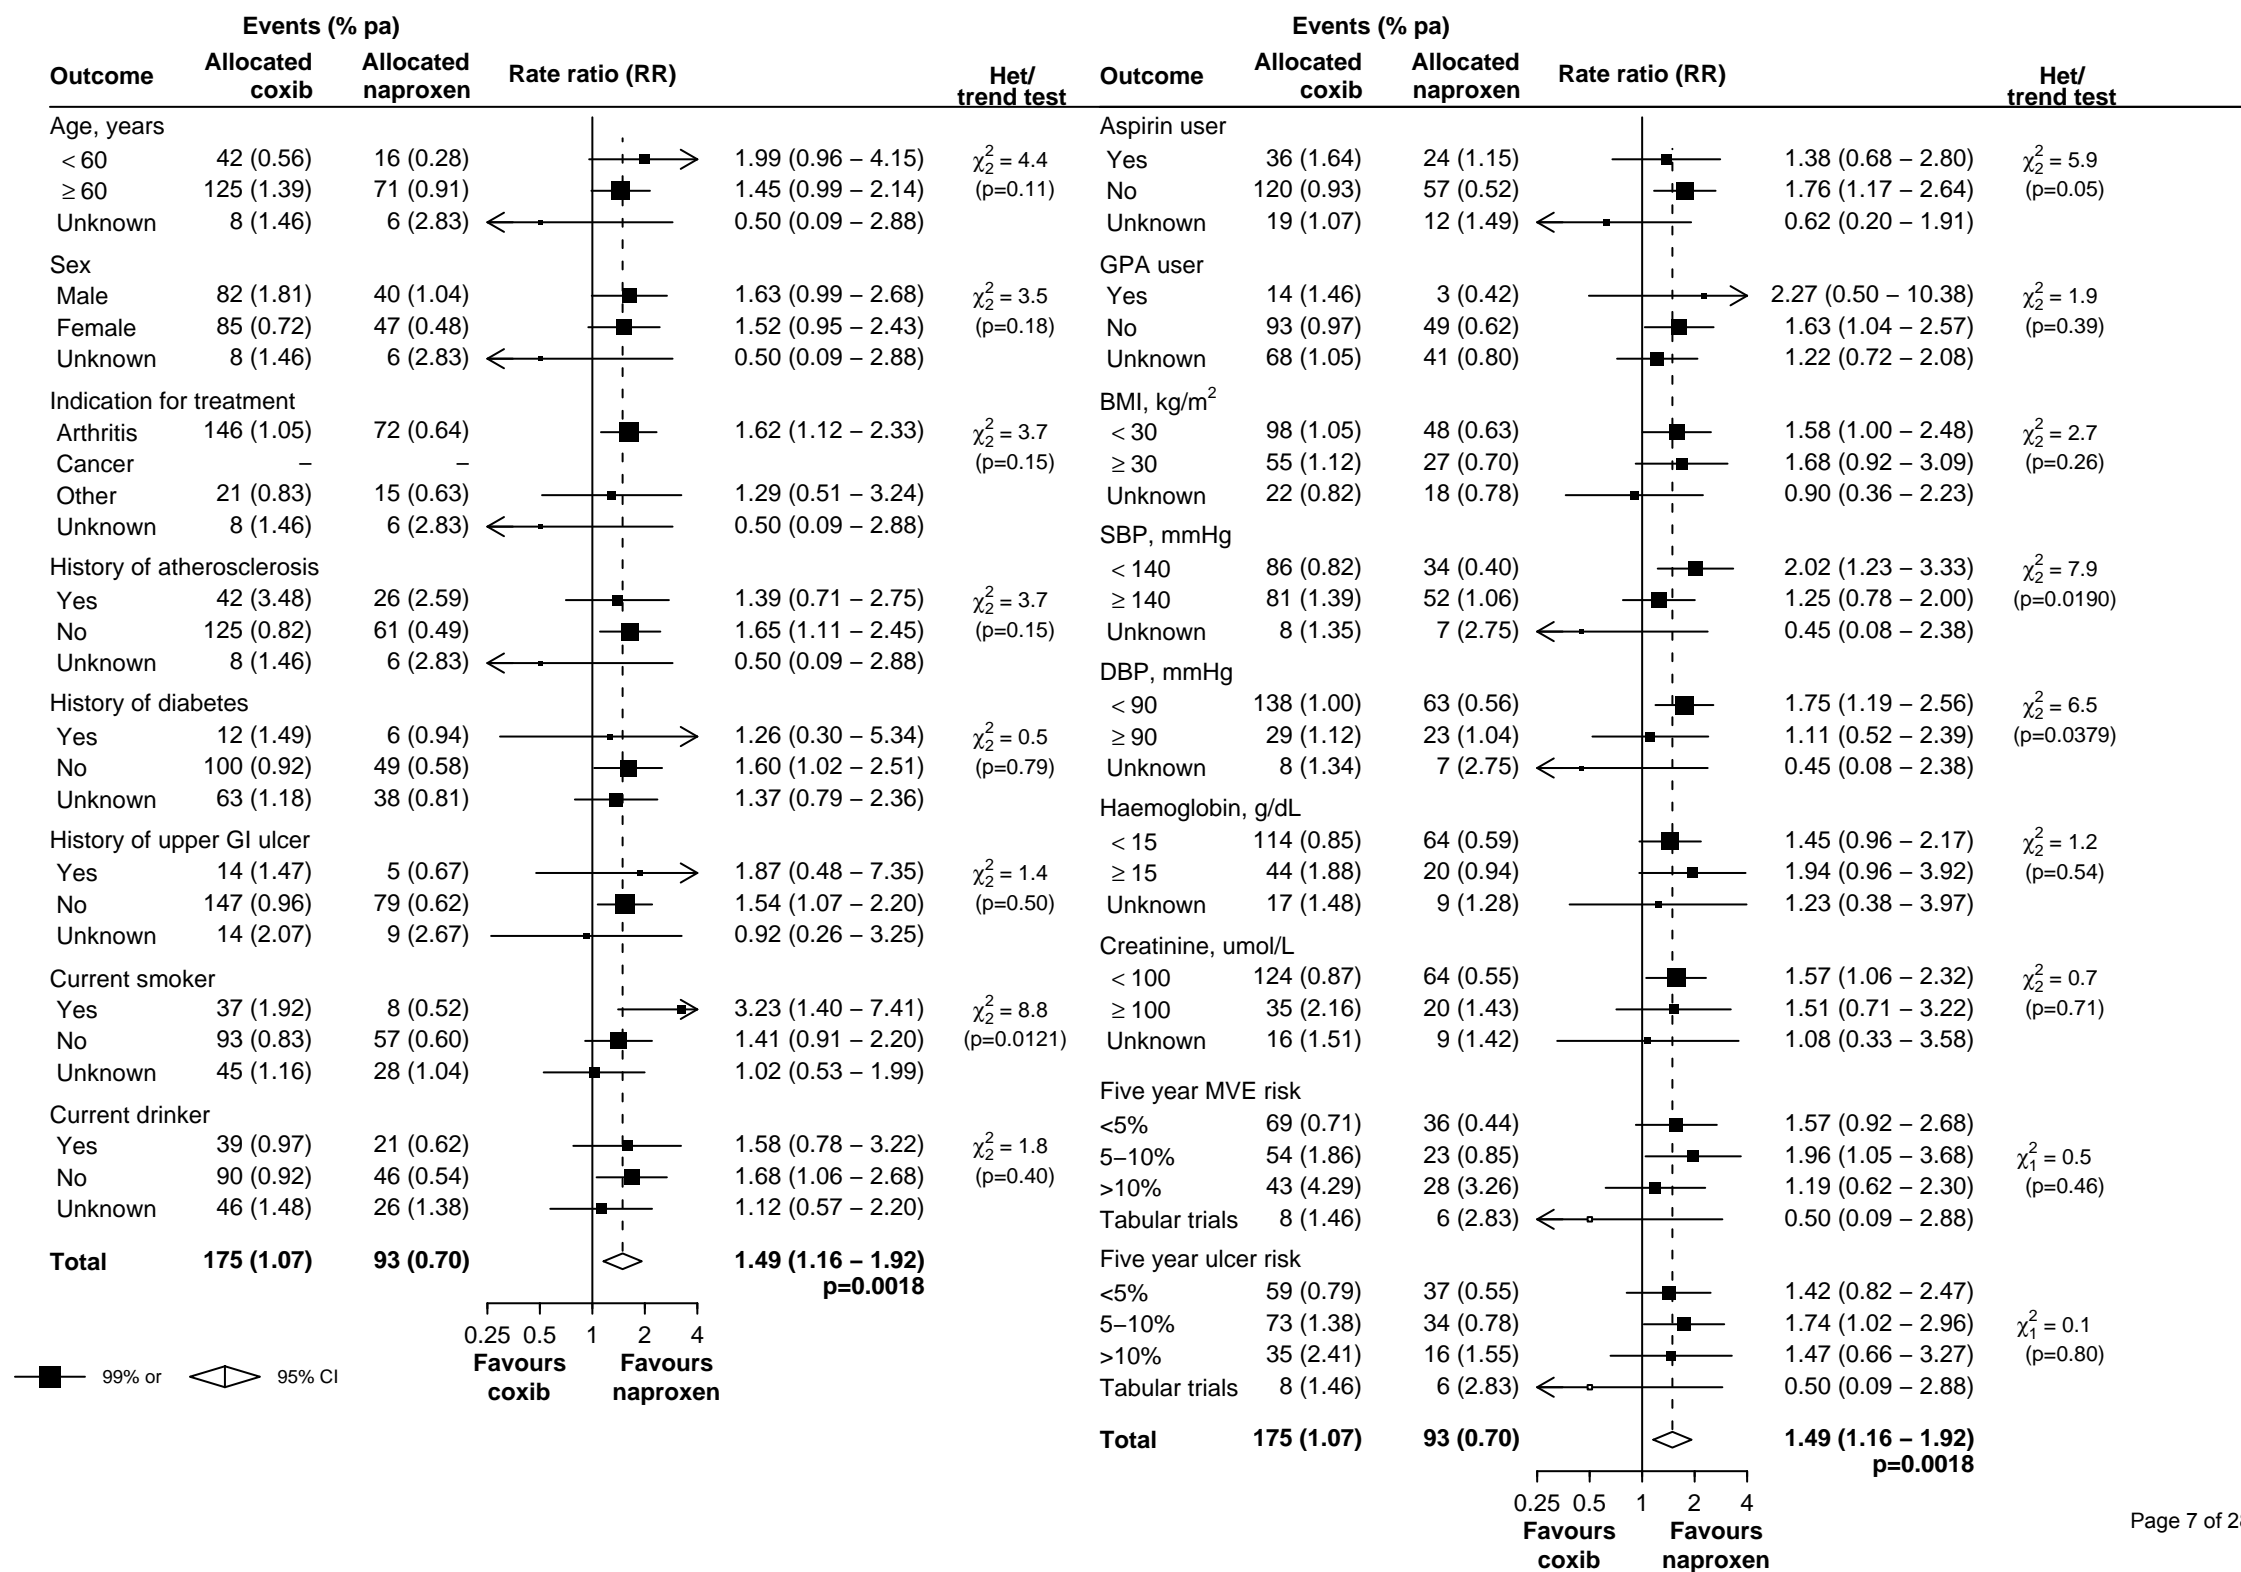

**Webfigure 5: Effect of non-naproxen tNSAIDs on major vascular events, by baseline characteristics**

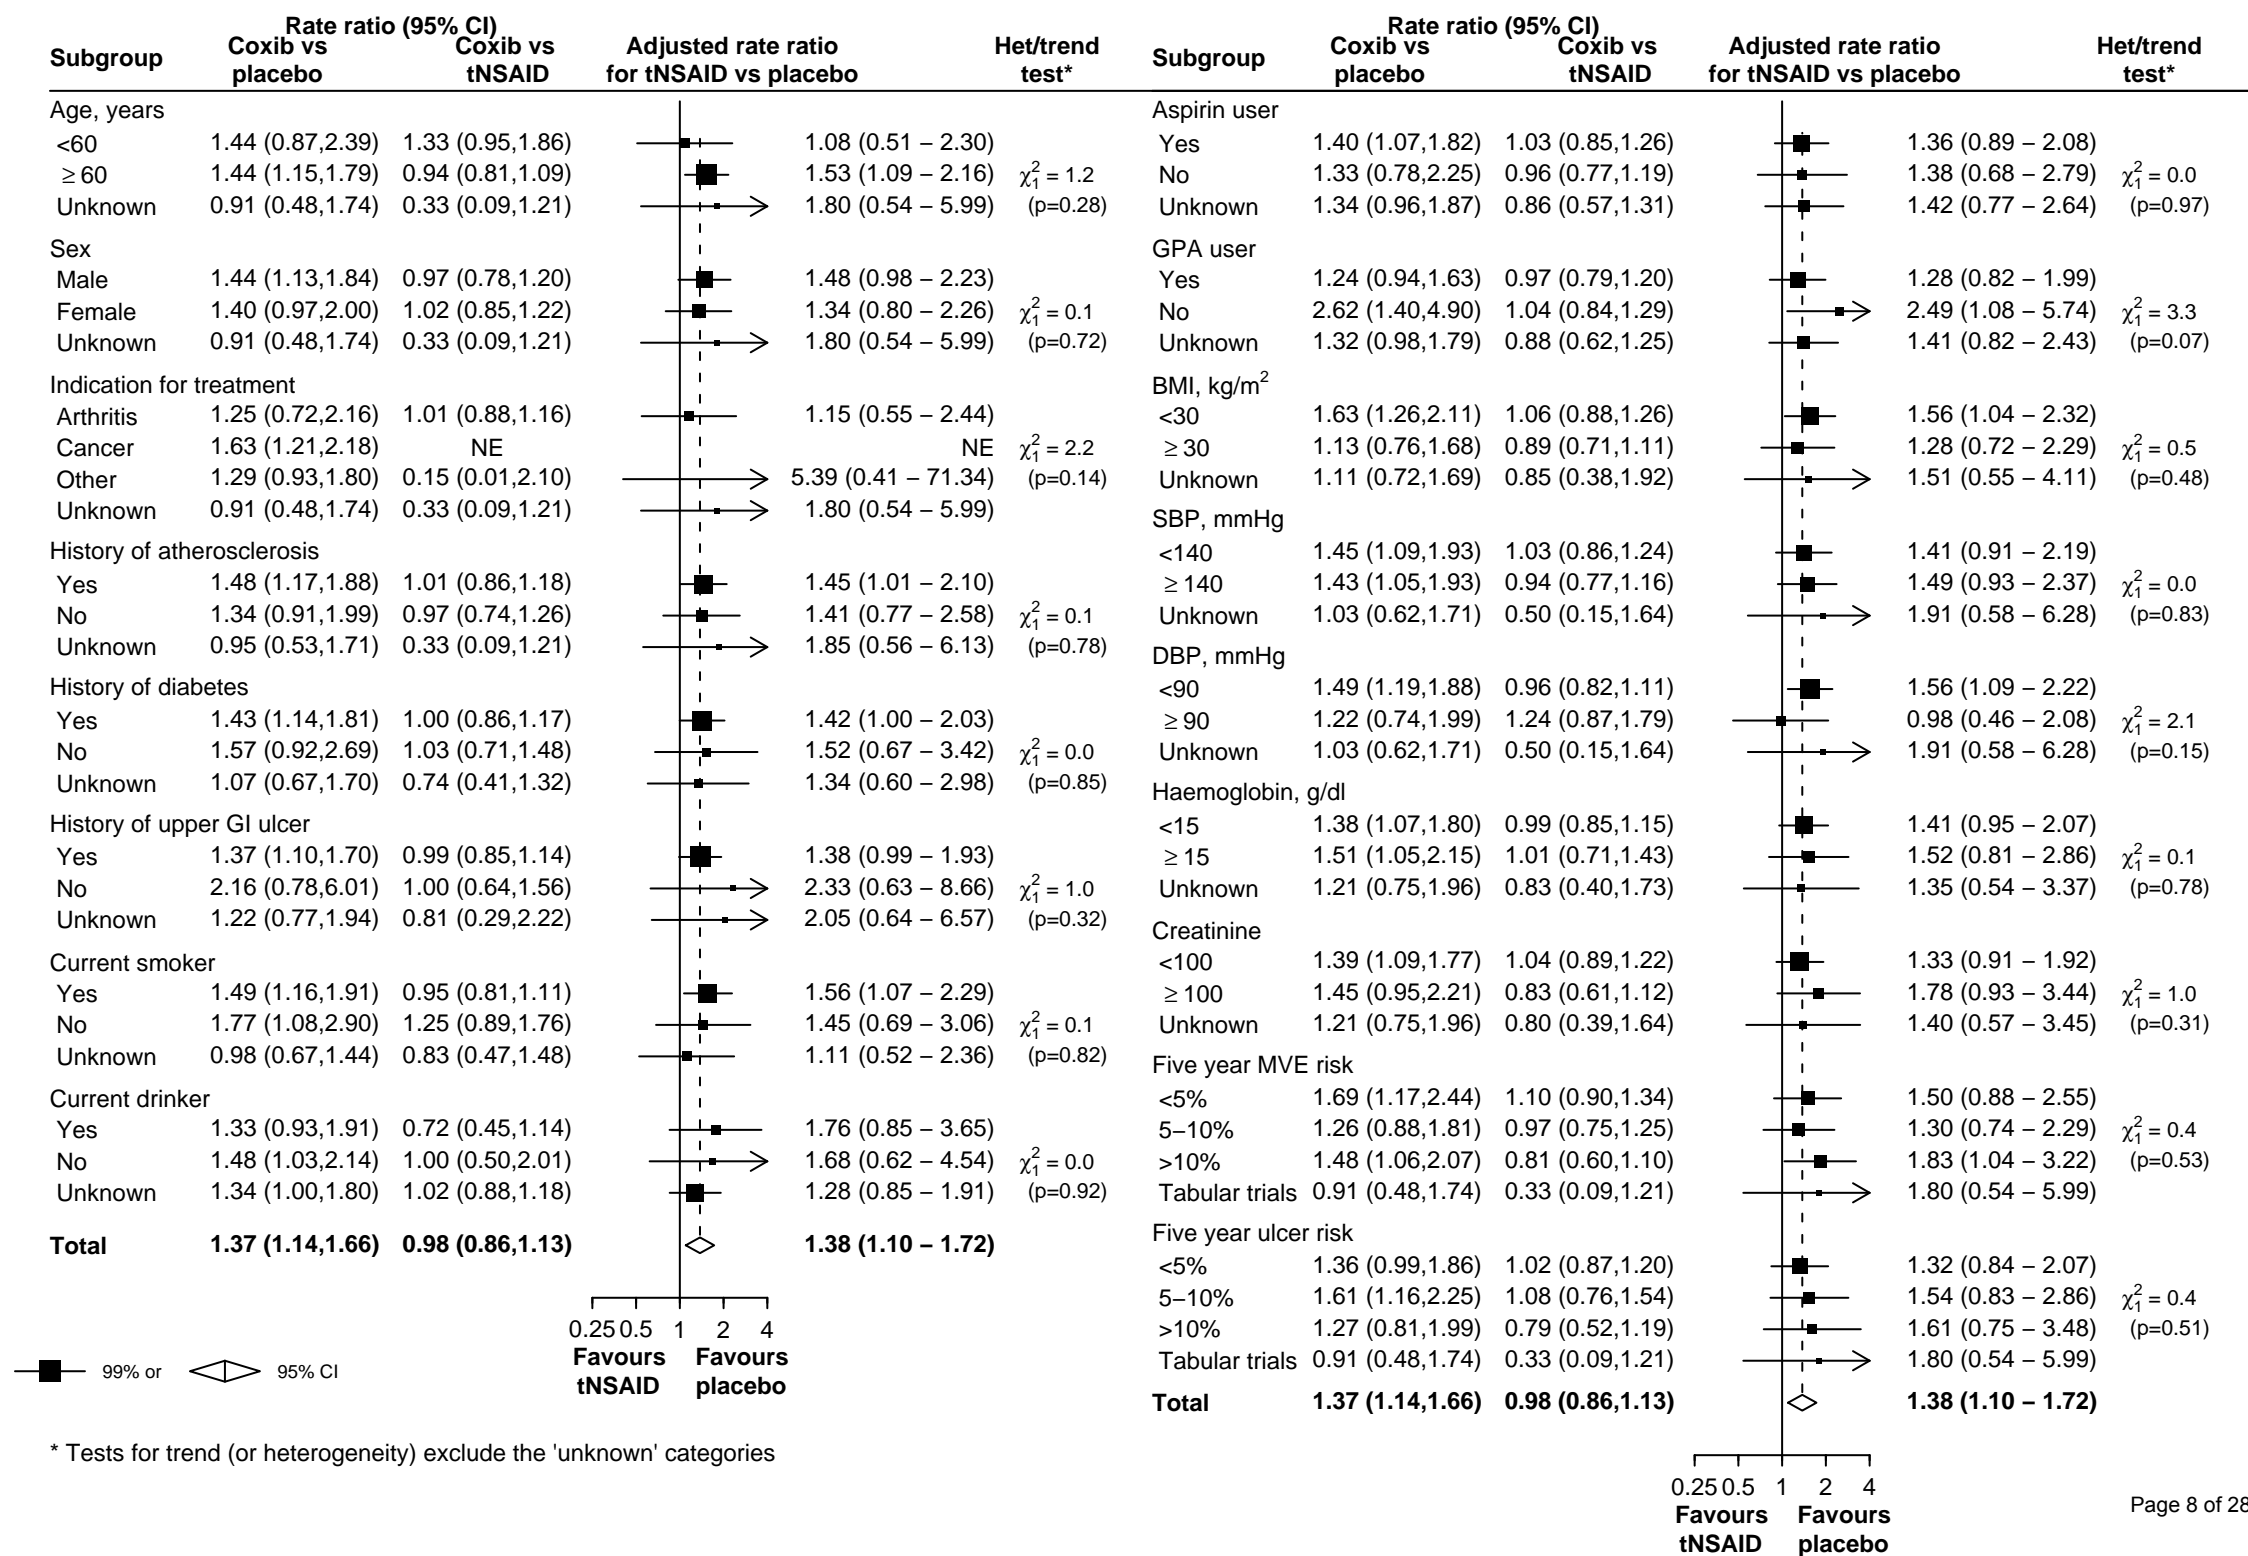

**Webfigure 6: Effect of naproxen on major vascular events, by baseline characteristics**

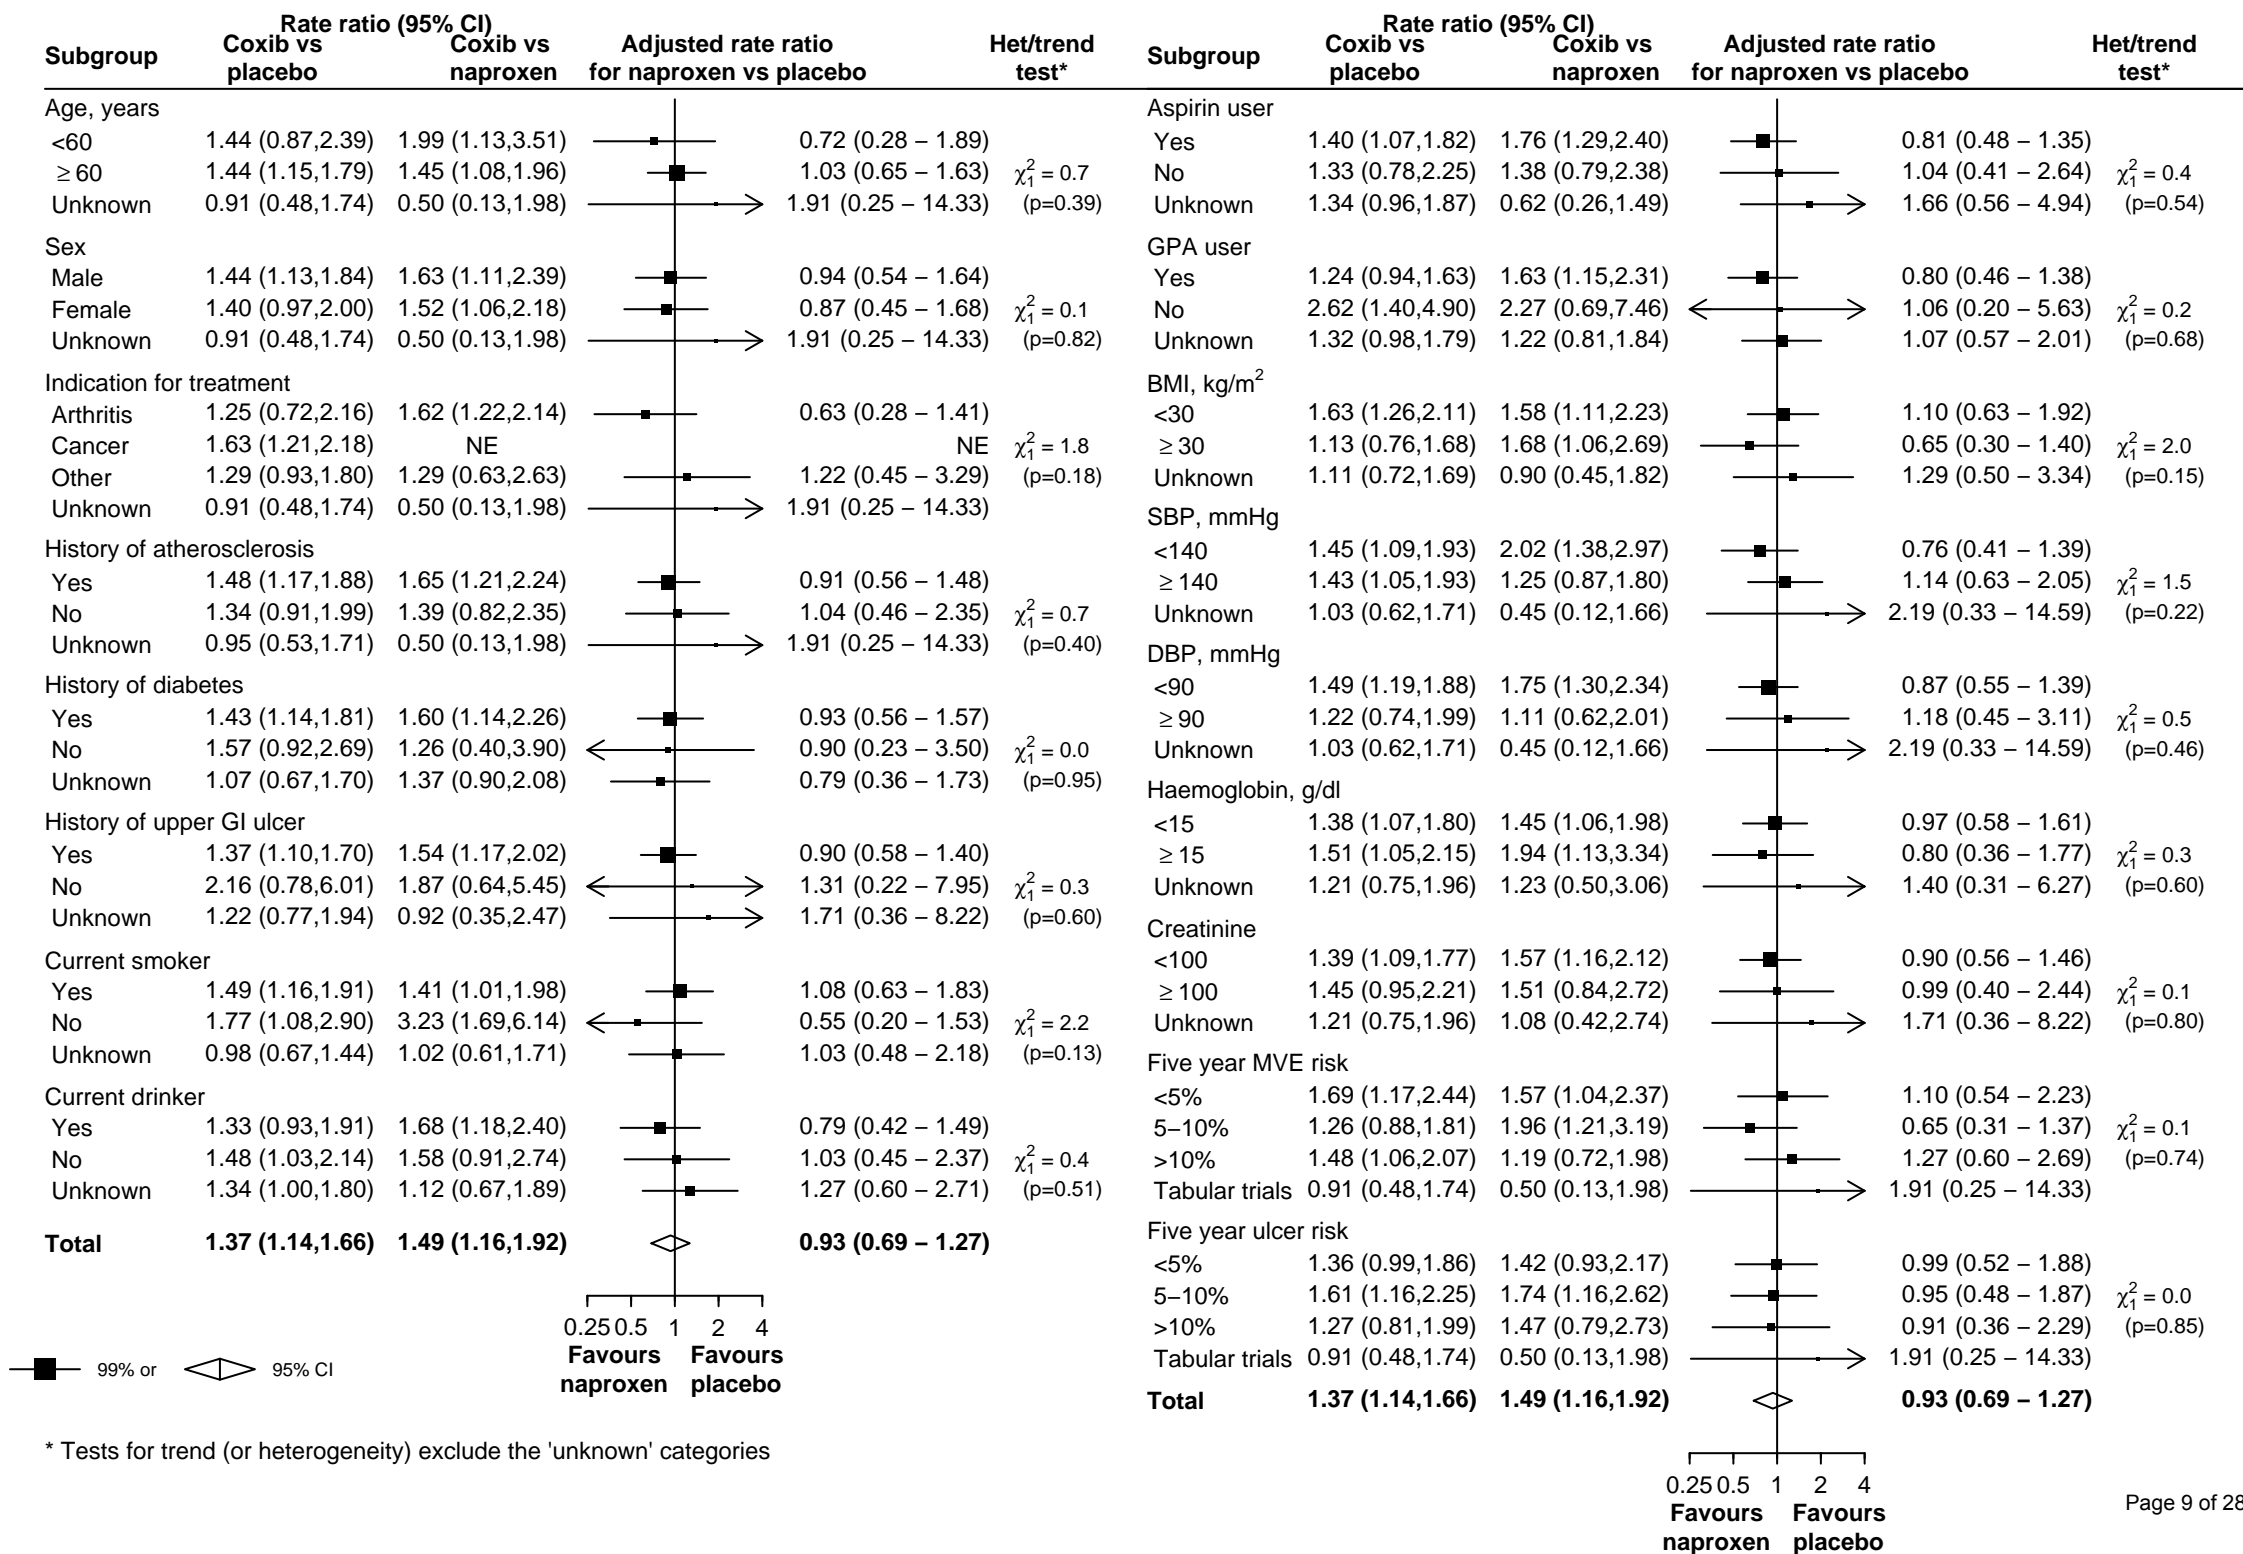

**Webfigure 7: Effect of coxib therapy on any symptomatic upper GI event, by baseline characteristics**

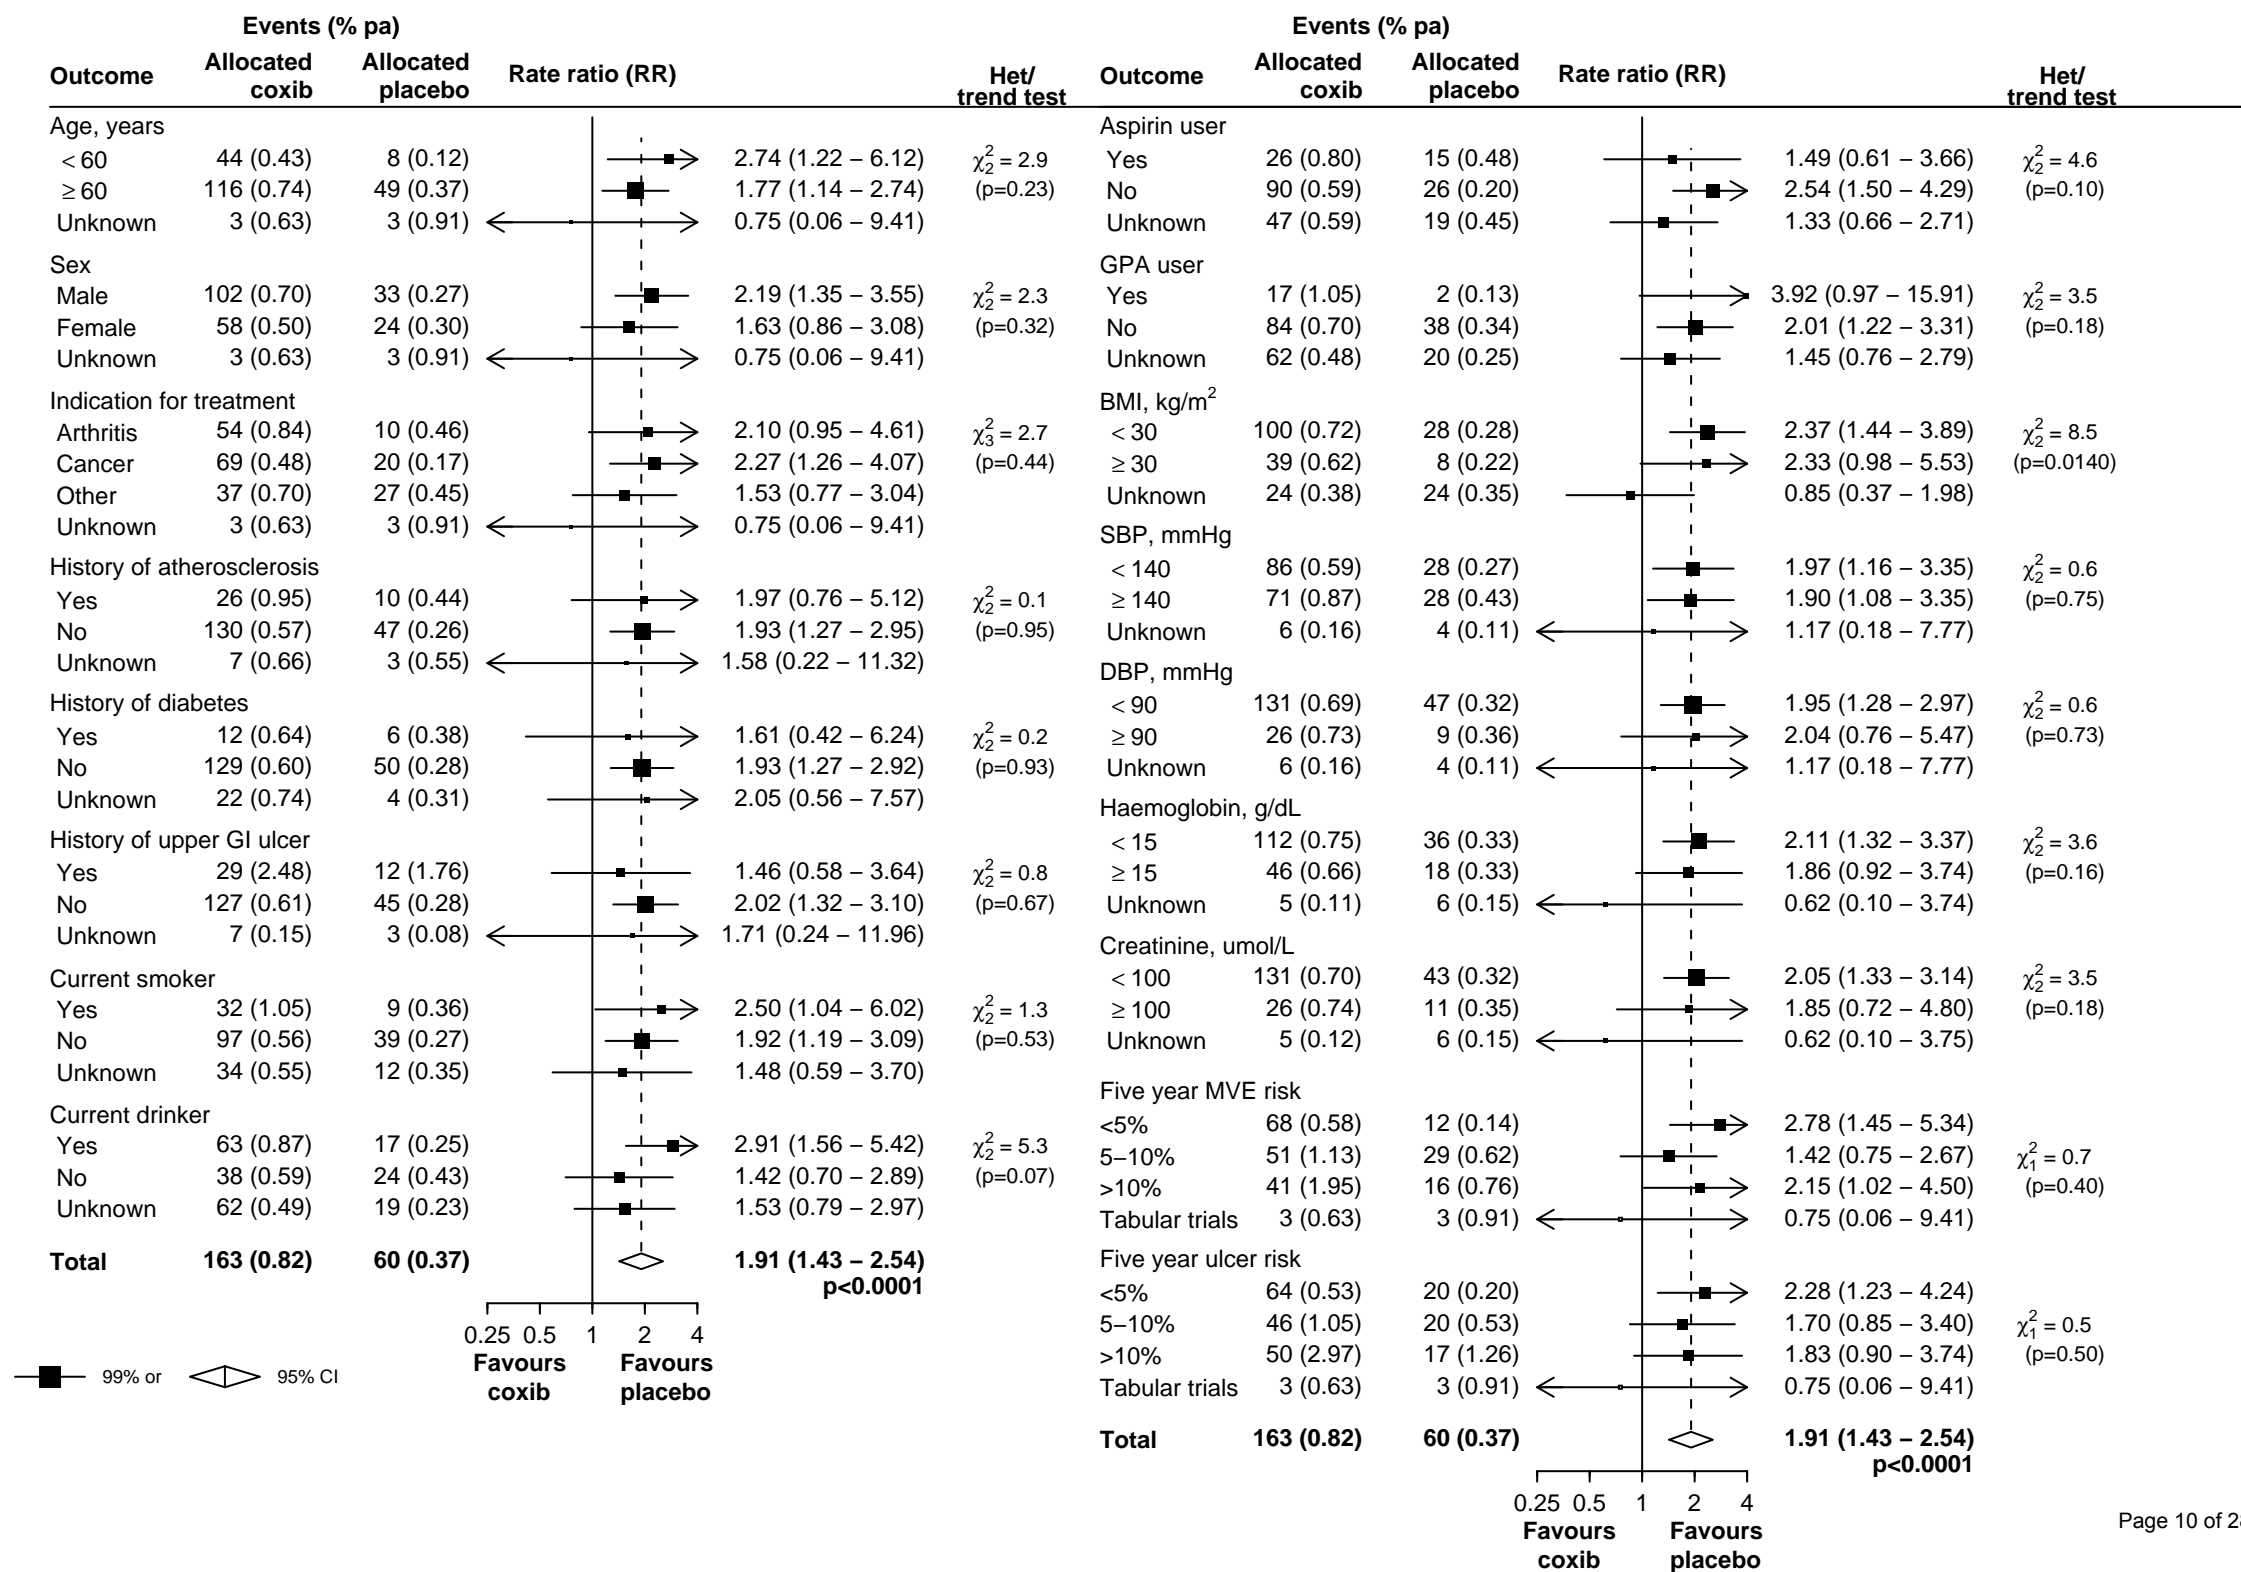

**Webfigure 8: Comparisons of coxibs vs non-naproxen NSAIDs. Effect on any symptomatic upper GI event by baseline characteristics**

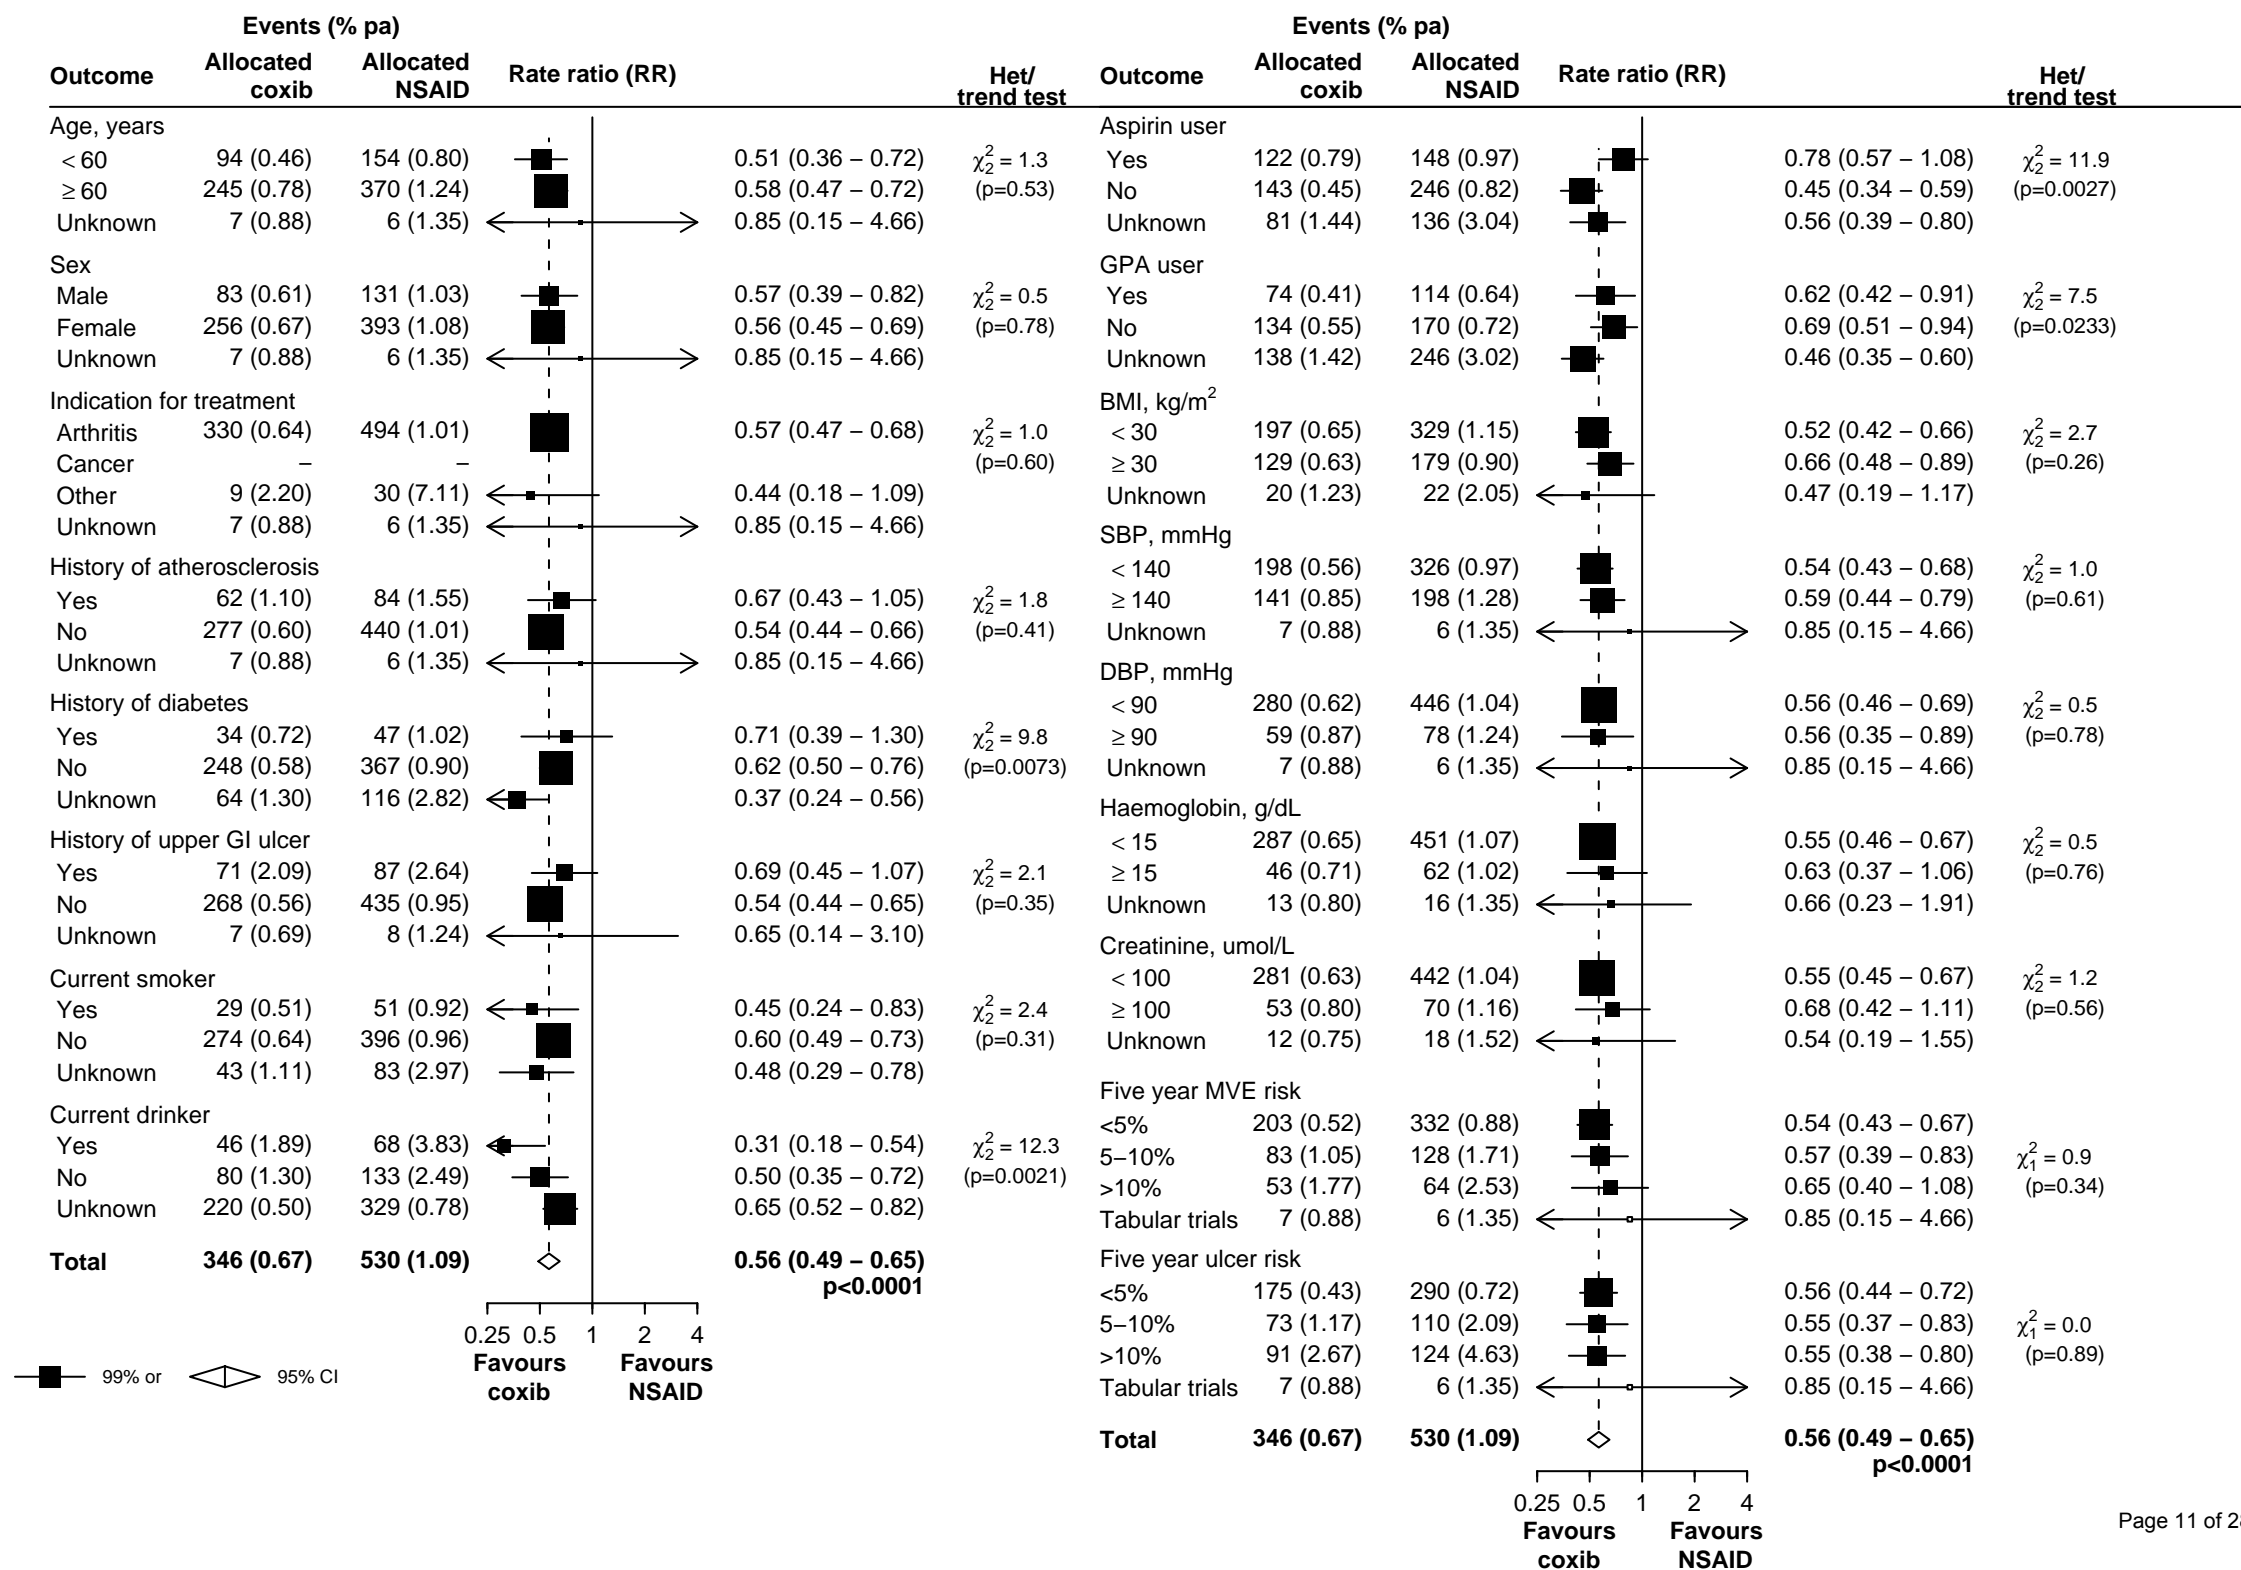

**Webfigure 9: Comparisons of coxibs vs naproxen. Effect on any symptomatic upper GI event by baseline characteristics**

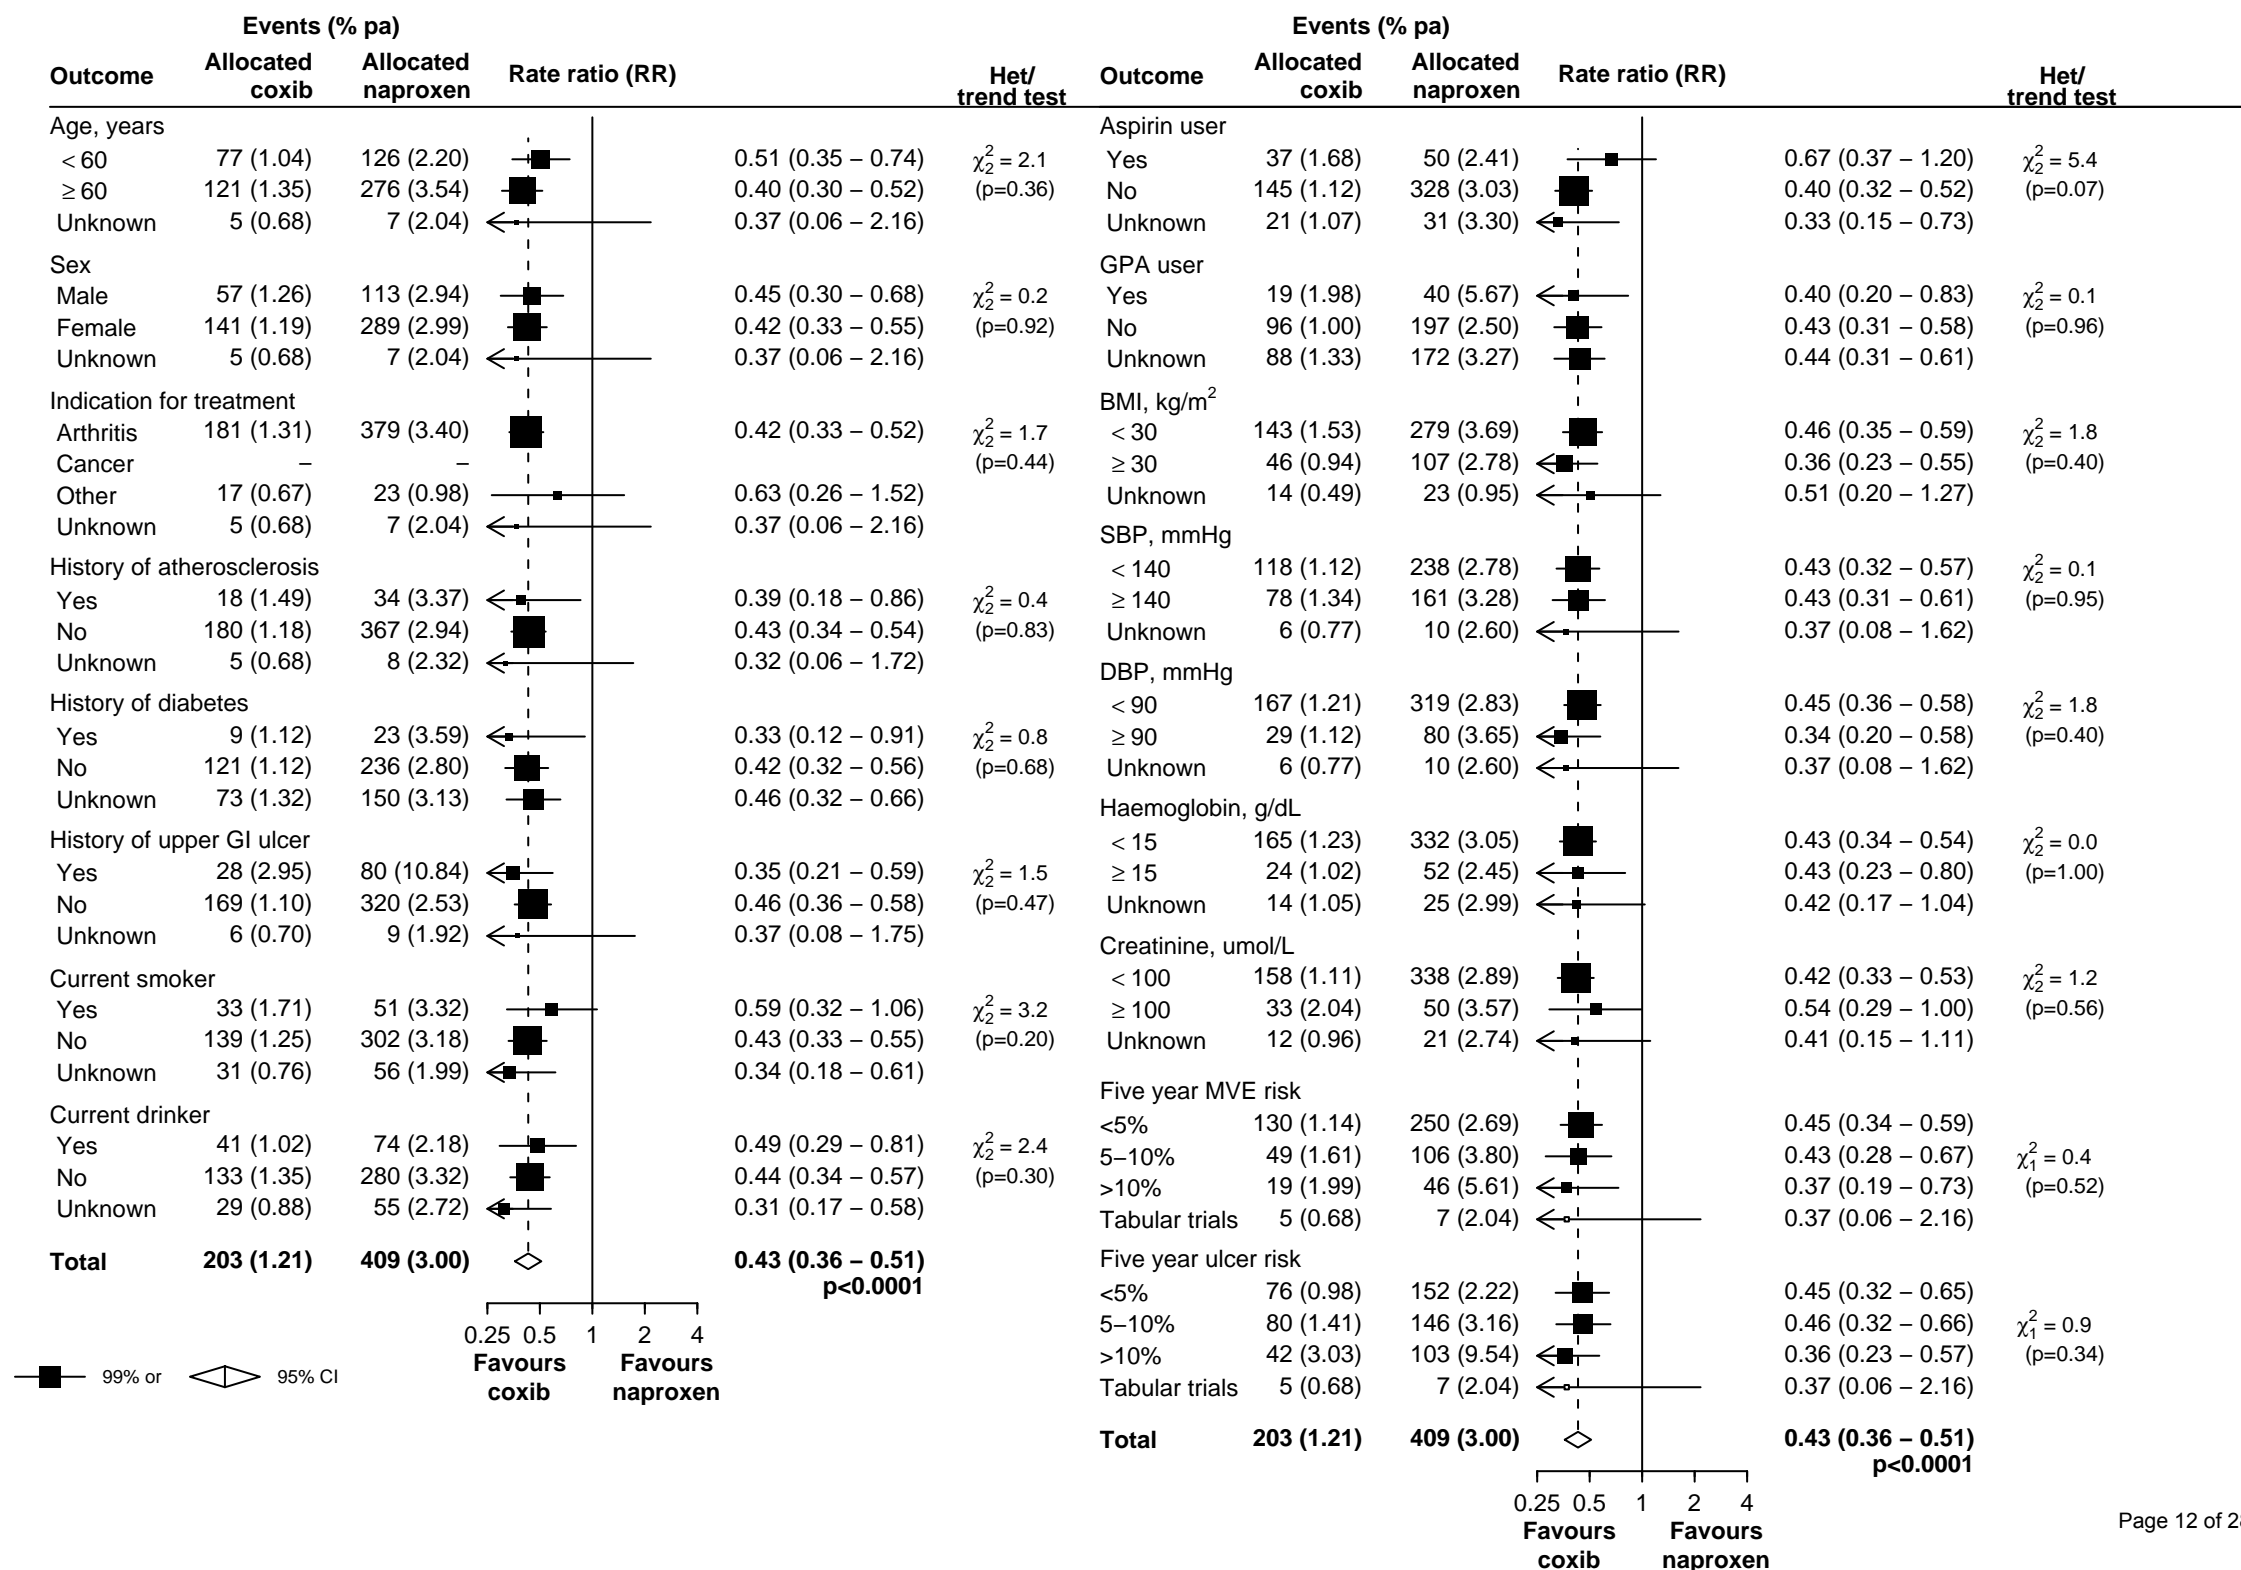

Webfigure 10: Effect of non-naproxen tNSAIDs on any symptomatic upper GI event, by baseline characteristics

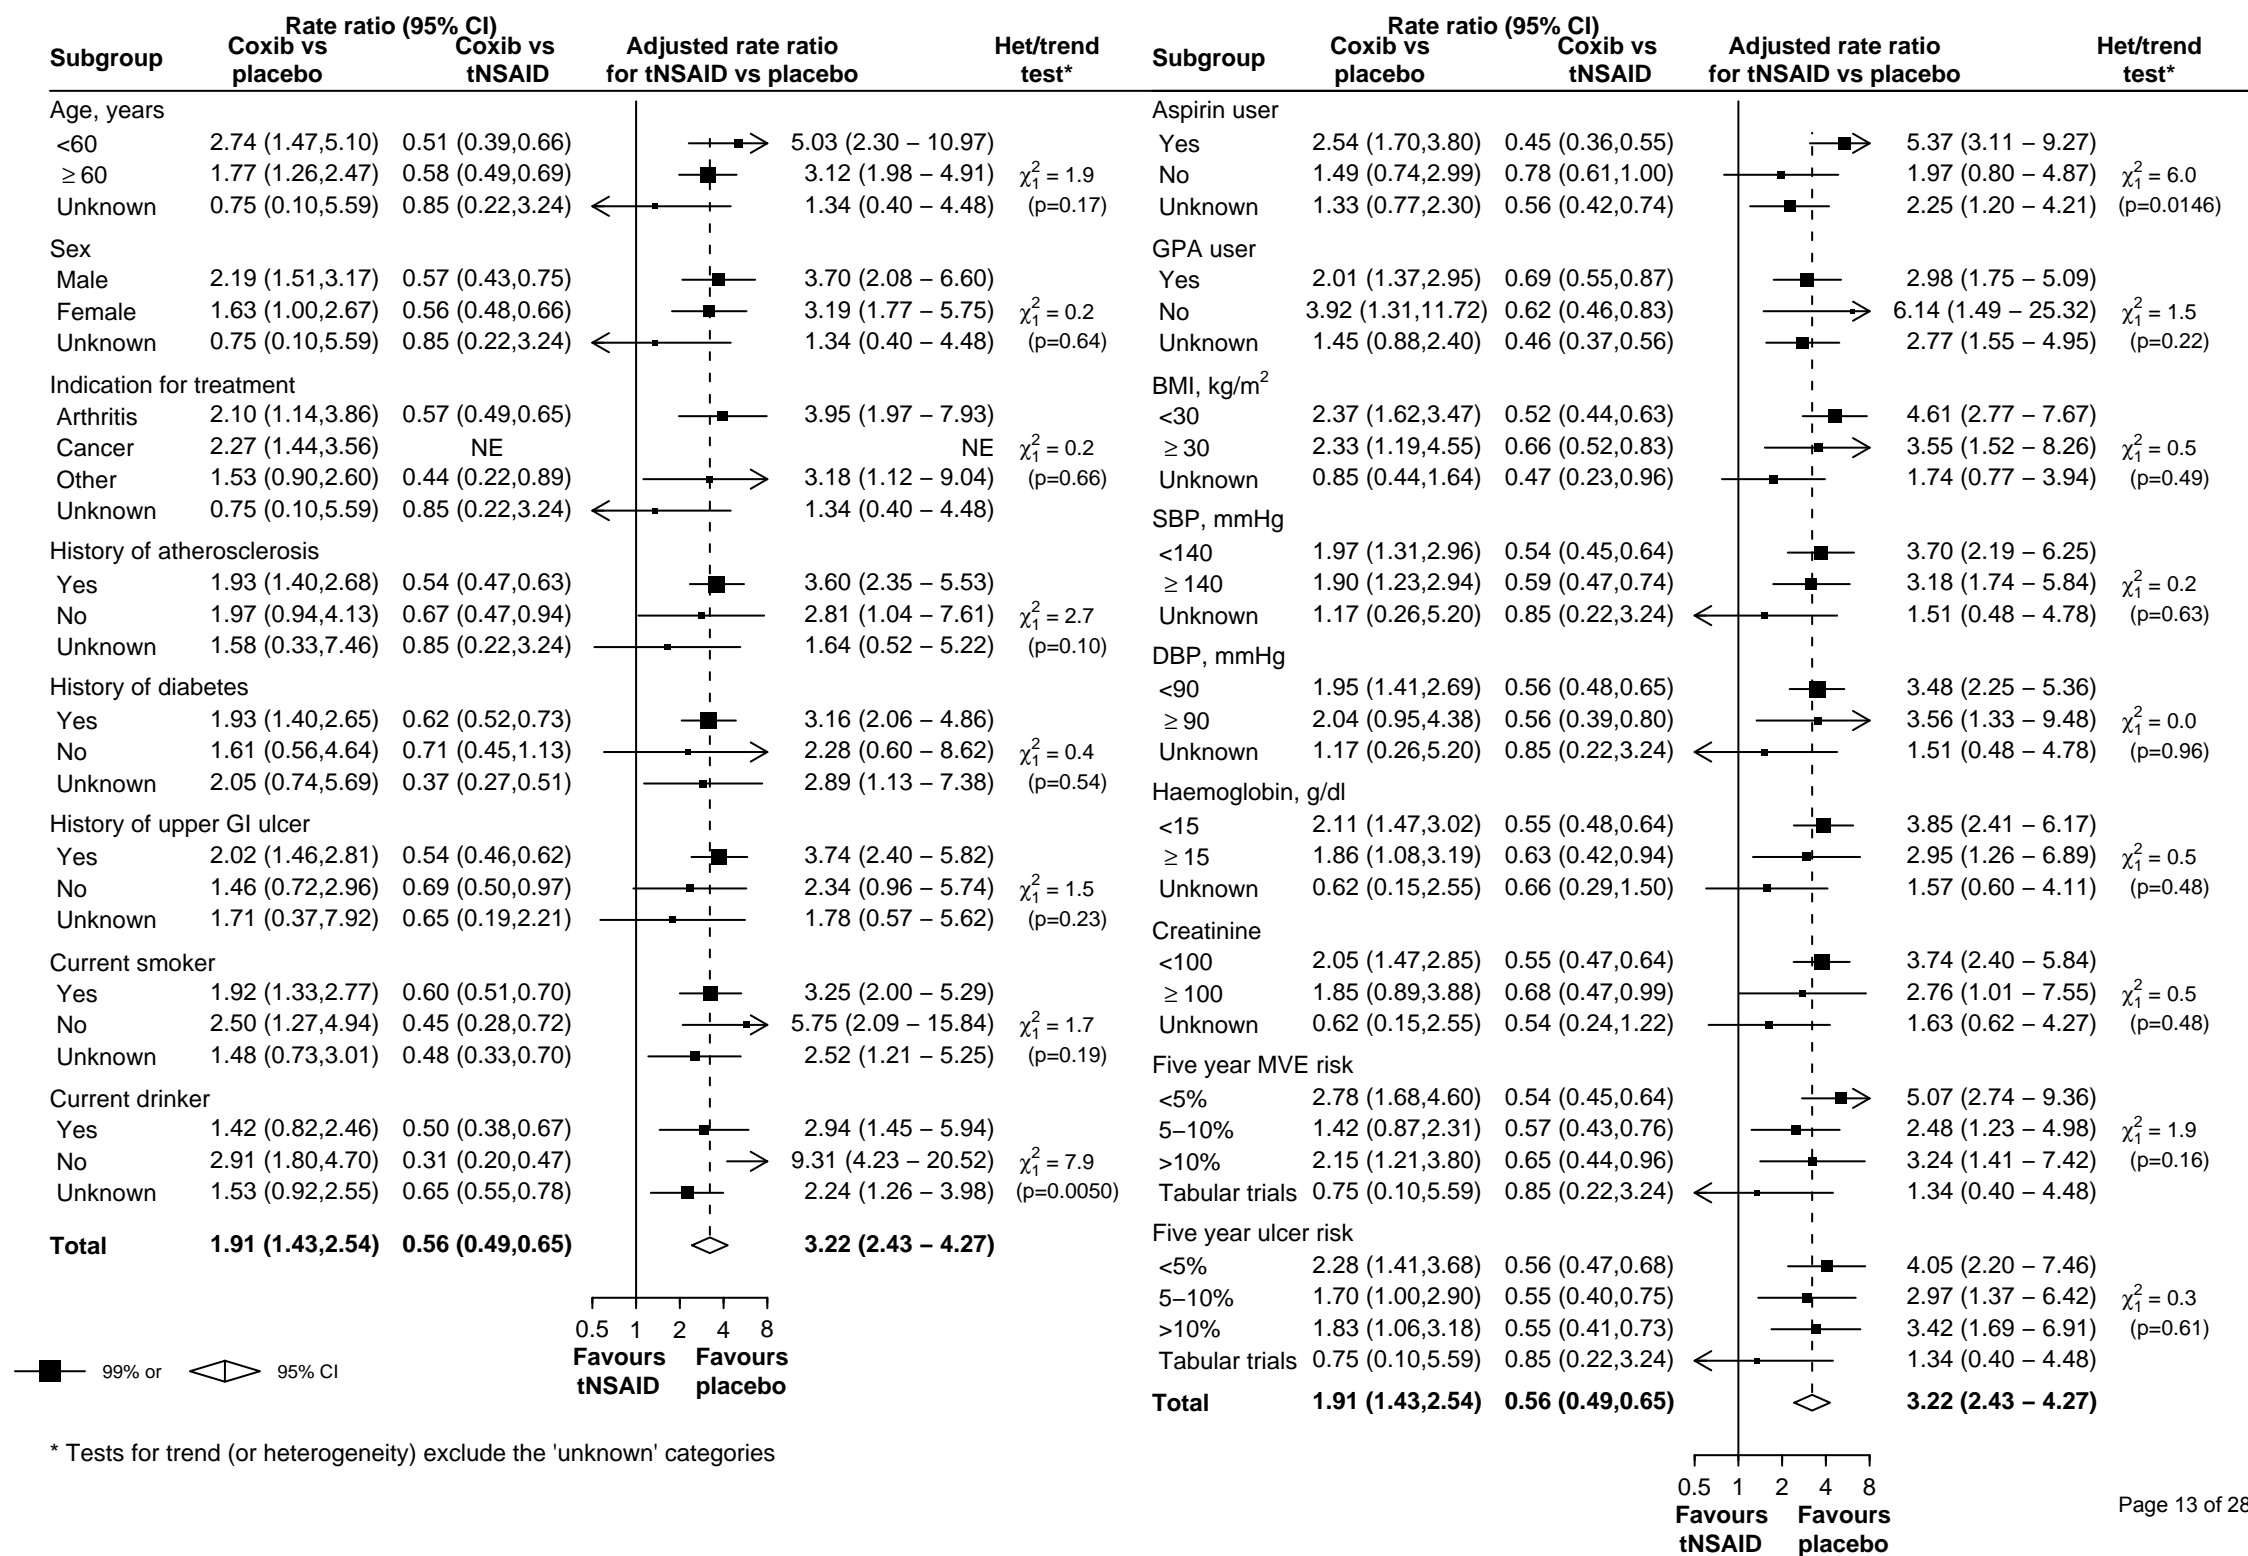

Webfigure 11: Effect of naproxen on any symptomatic upper GI event, by baseline characteristics

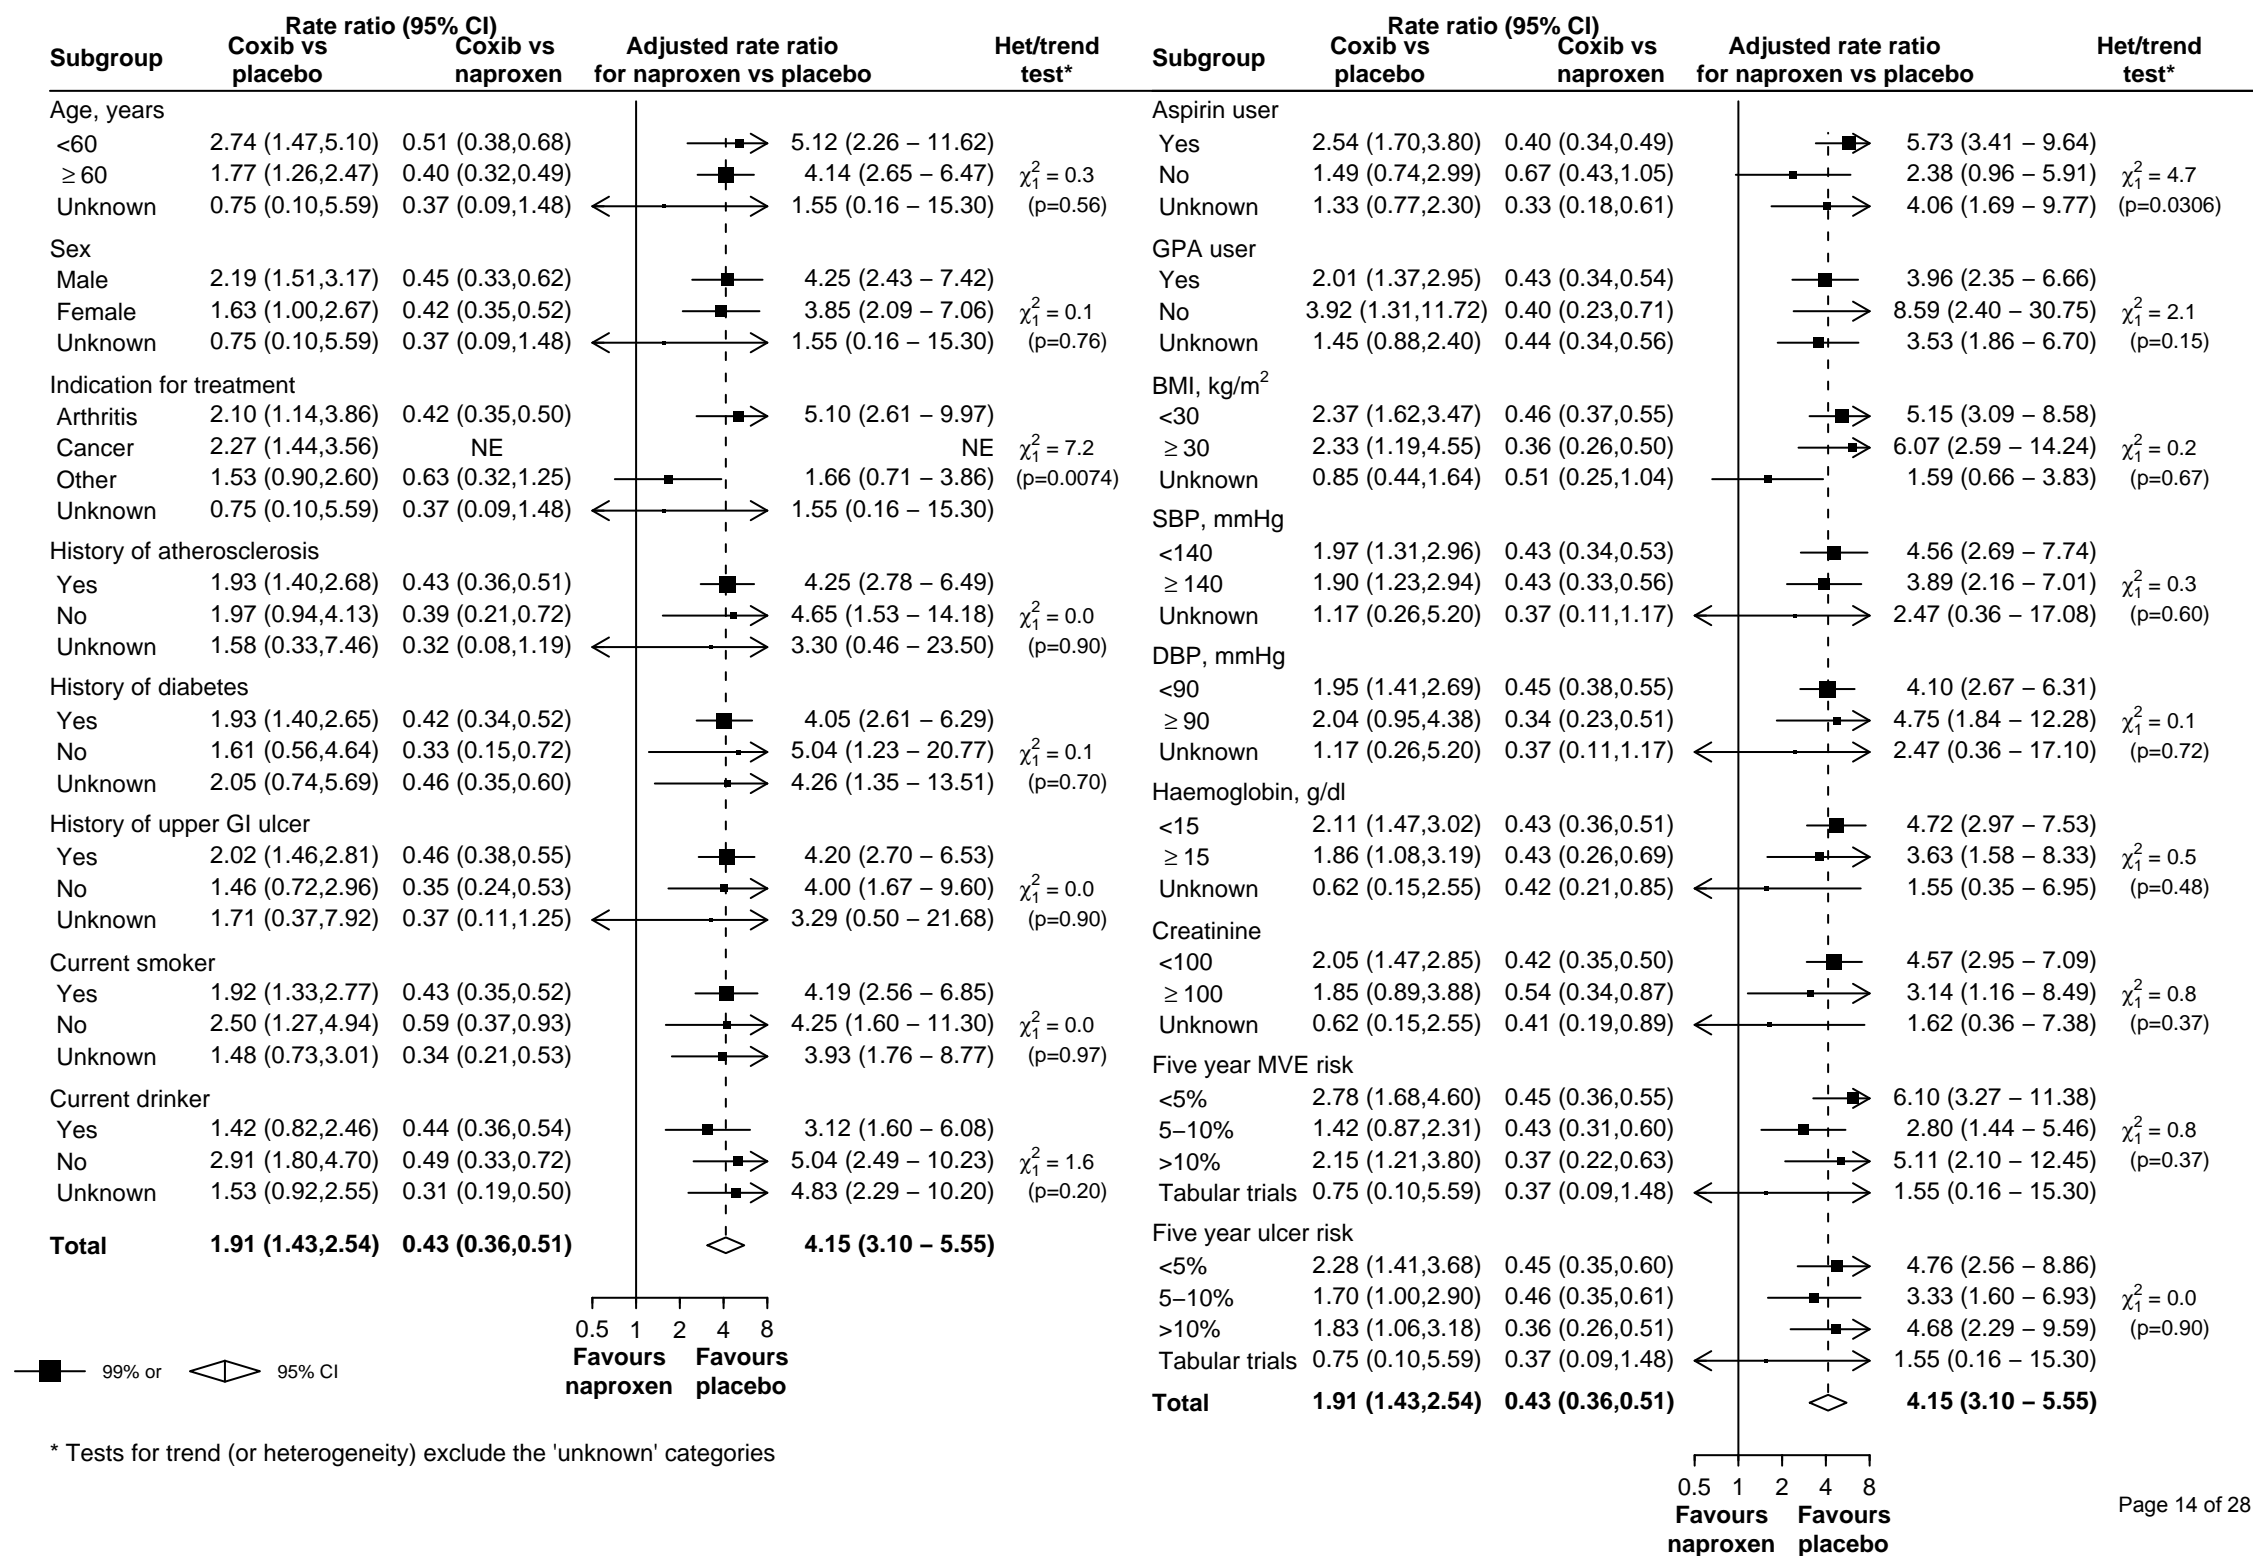



## Webfigure 12: Effect of coxibs, non-naproxen tNSAIDs and naproxen on major vascular events, by duration of treatment

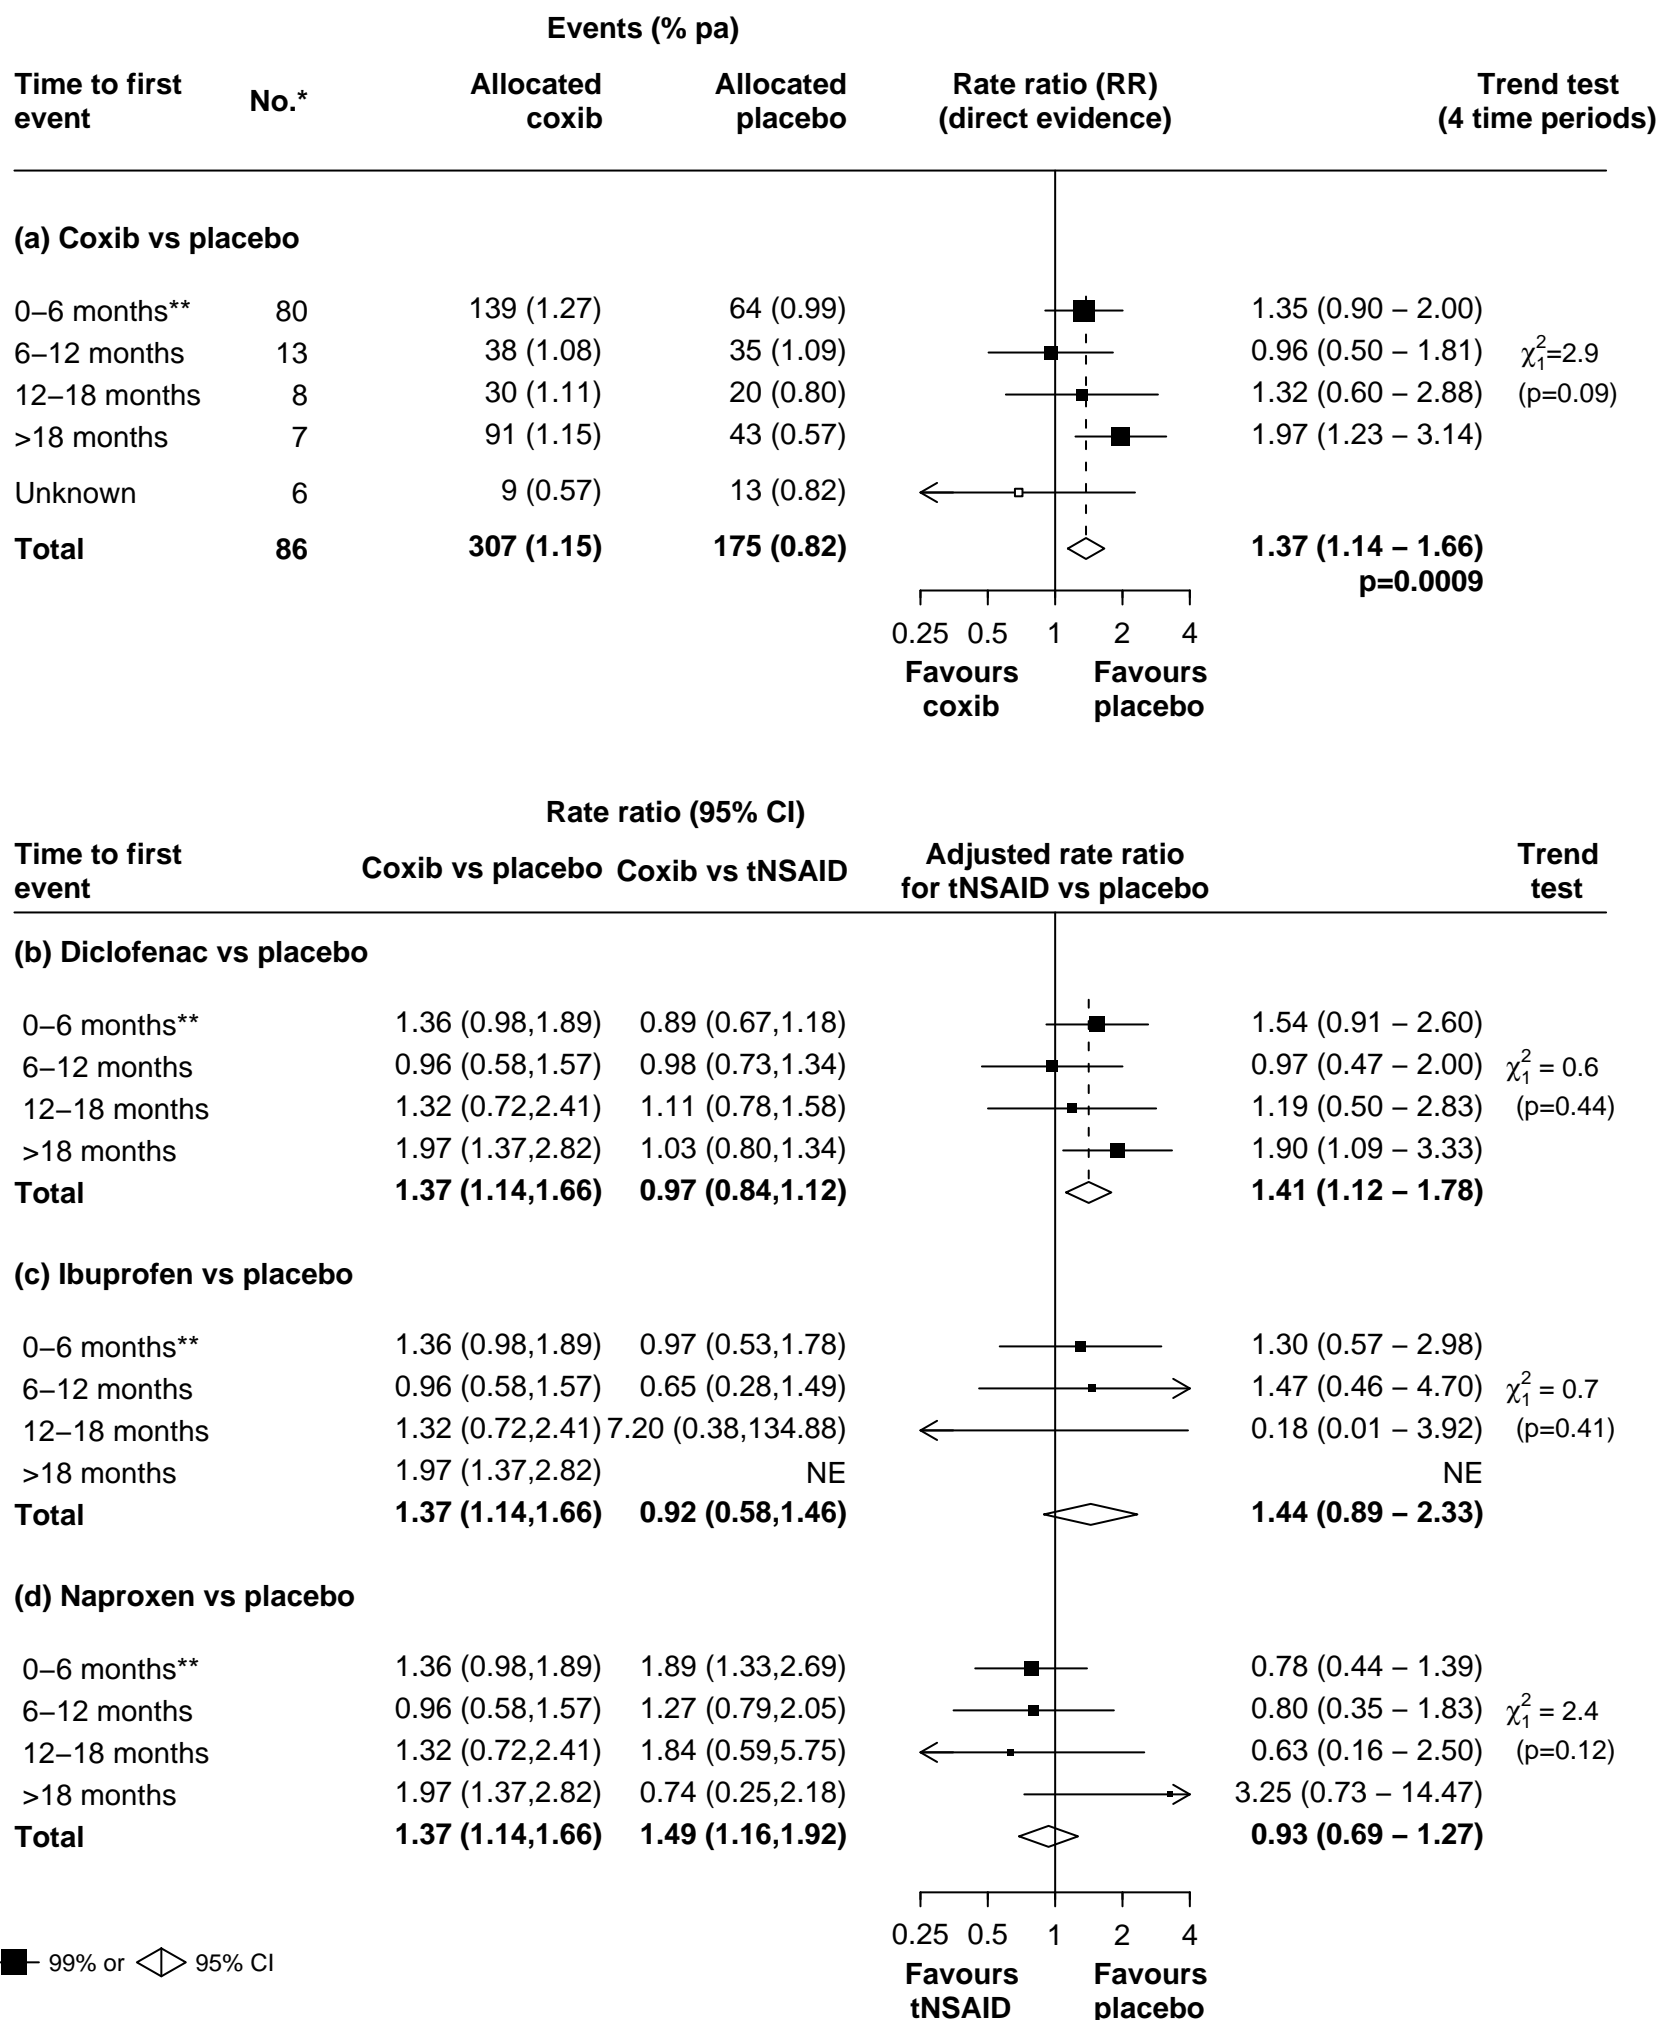

\* Number of comparisons with at least one event in that period

\*\* Includes tabular data from trials known to be <6 months duration. Other tabular trials for which events dates are unknown only contribute to the summary diamond.

### Webfigure 13: Effect of coxibs, non-naproxen tNSAIDs and naproxen on any symptomatic upper GI event, by duration of treatment

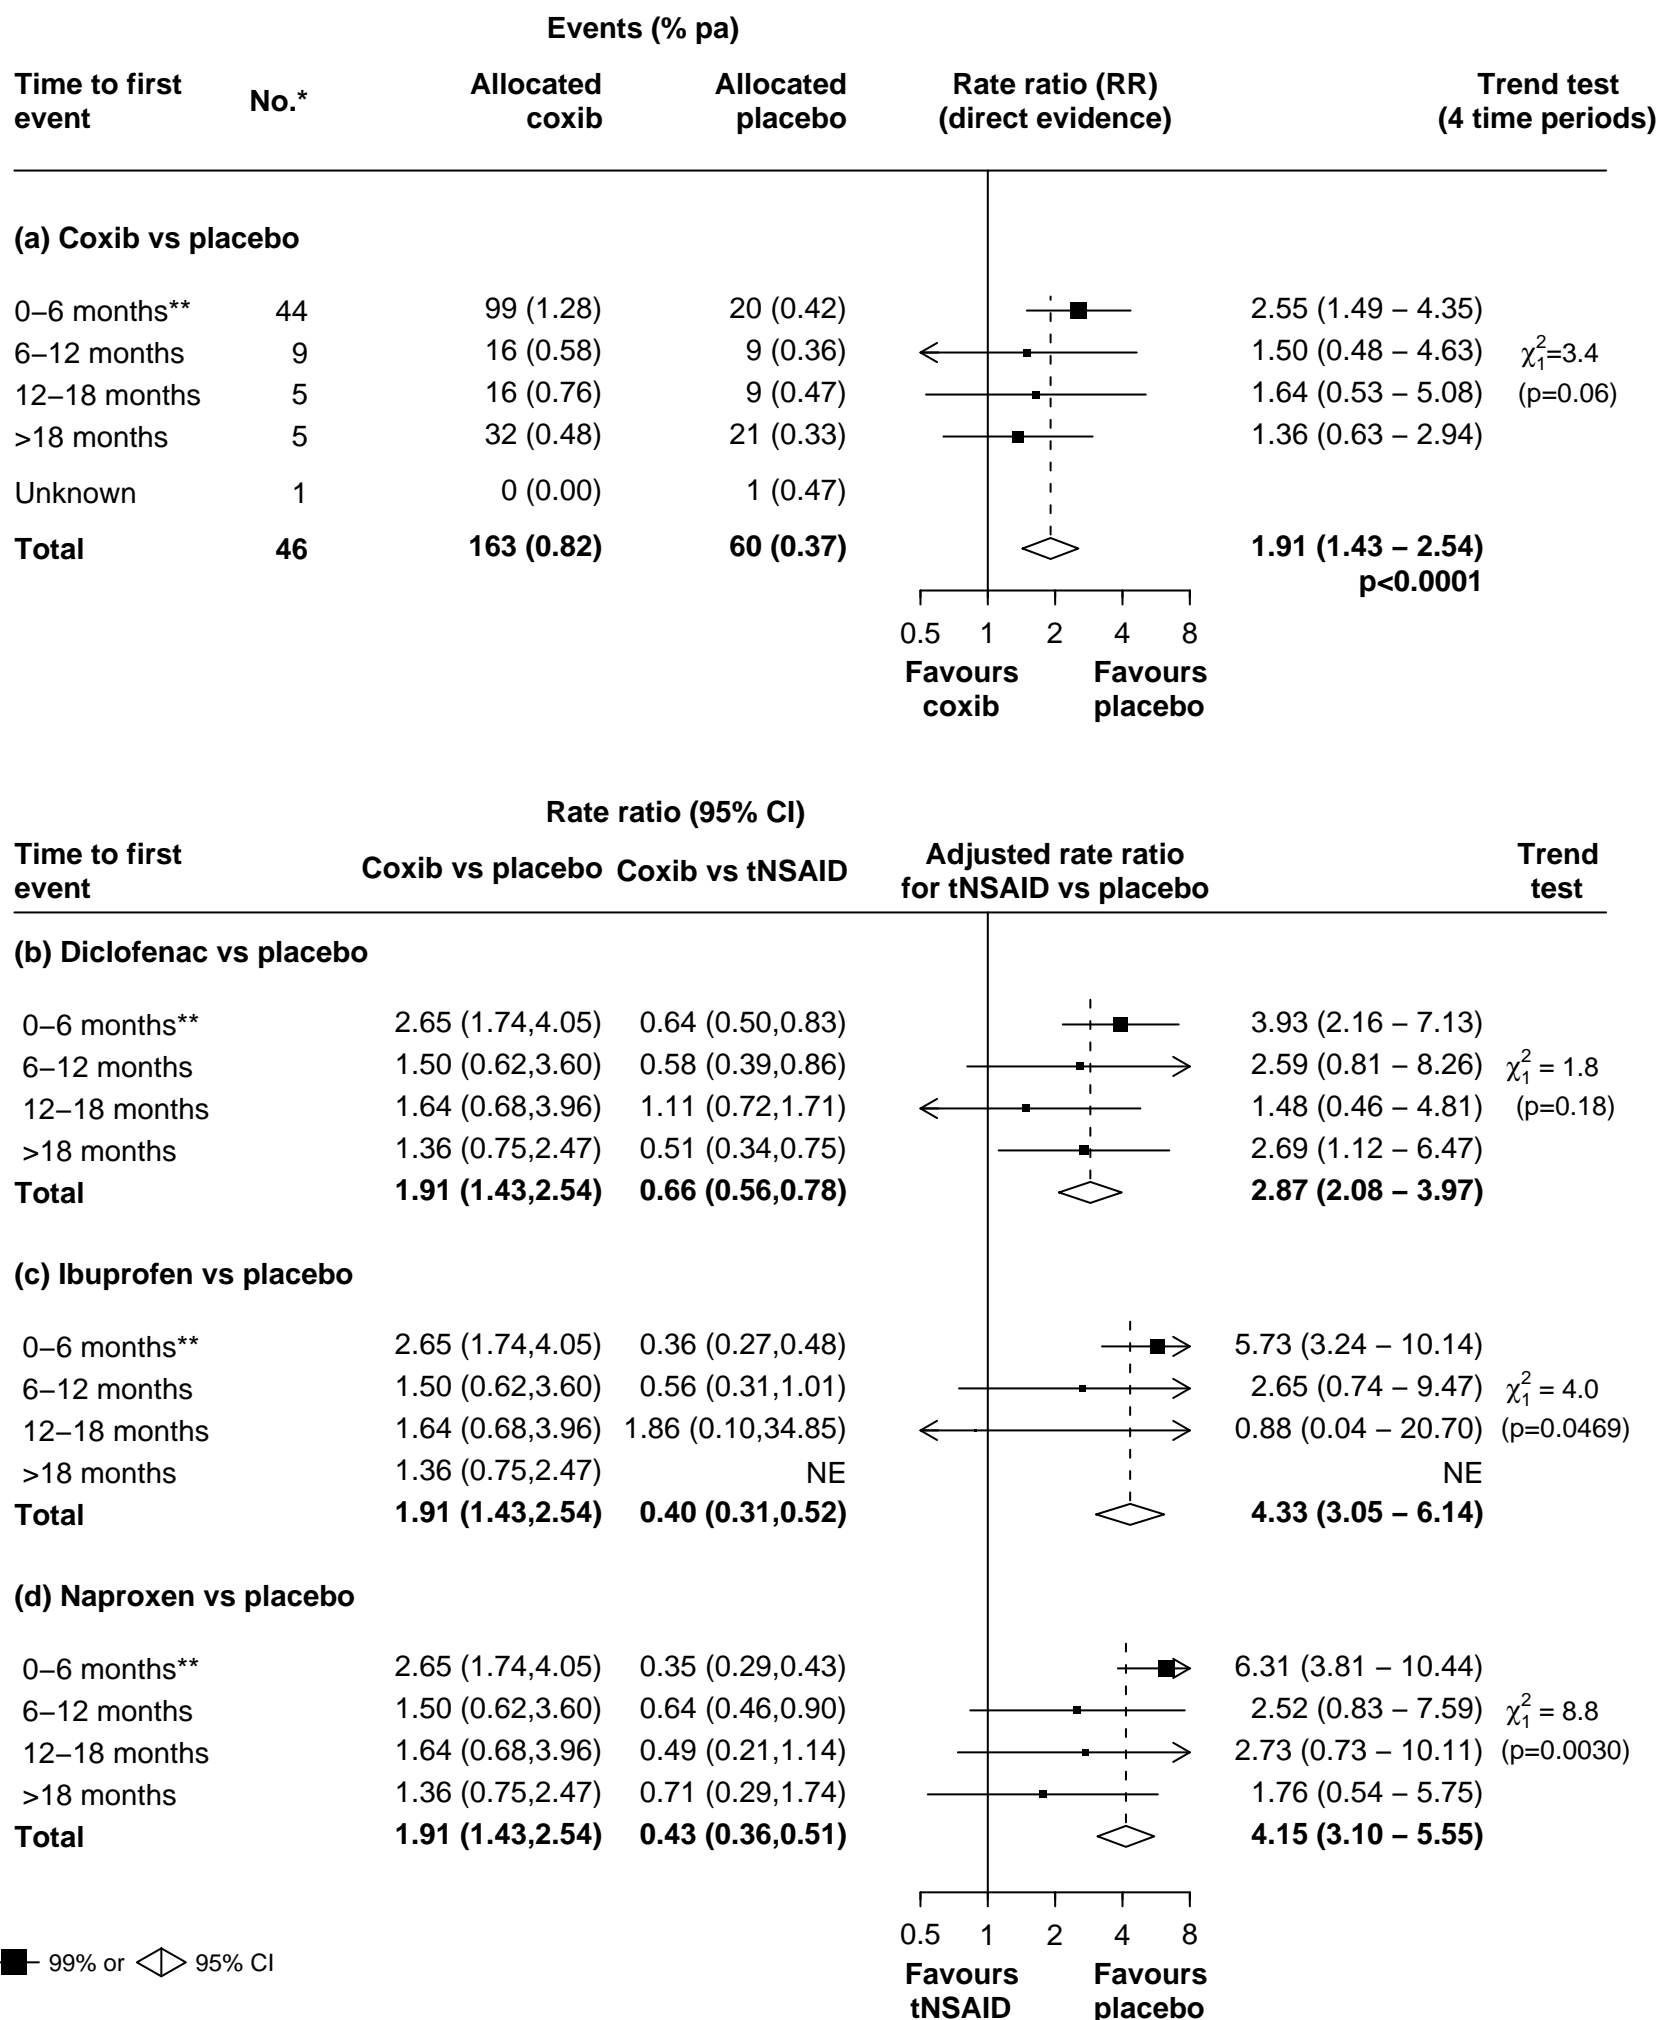

\* Number of comparisons with at least one event in that period

\*\* Includes tabular data from trials known to be <6 months duration. Other tabular trials for which events dates are unknown only contribute to the summary diamond.

**Webfigure 14: Effect of coxib therapy on major vascular events, by type of coxib**

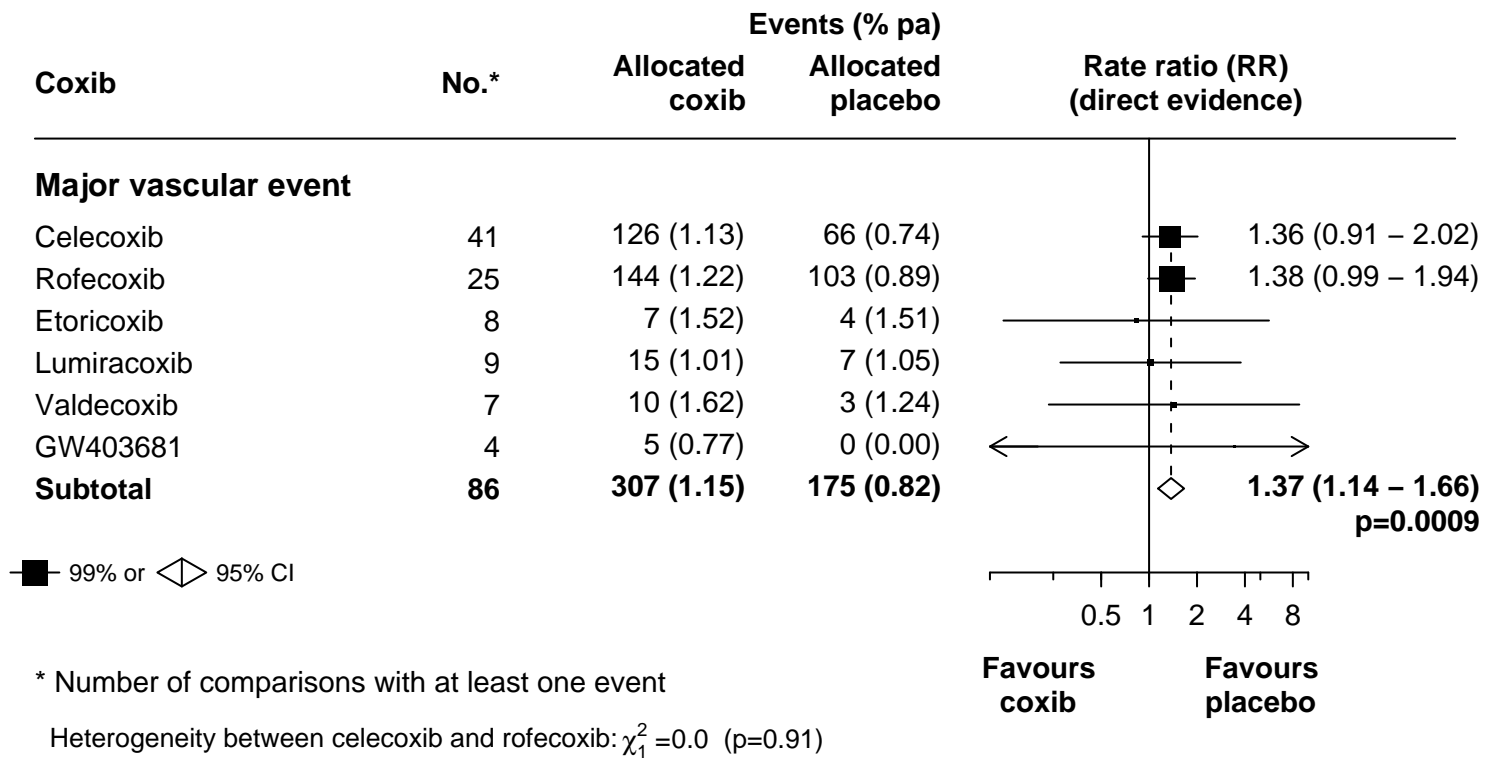

**Webfigure 15: Effect of different coxib regimens on major vascular events, by dose: trials of a coxib vs placebo**

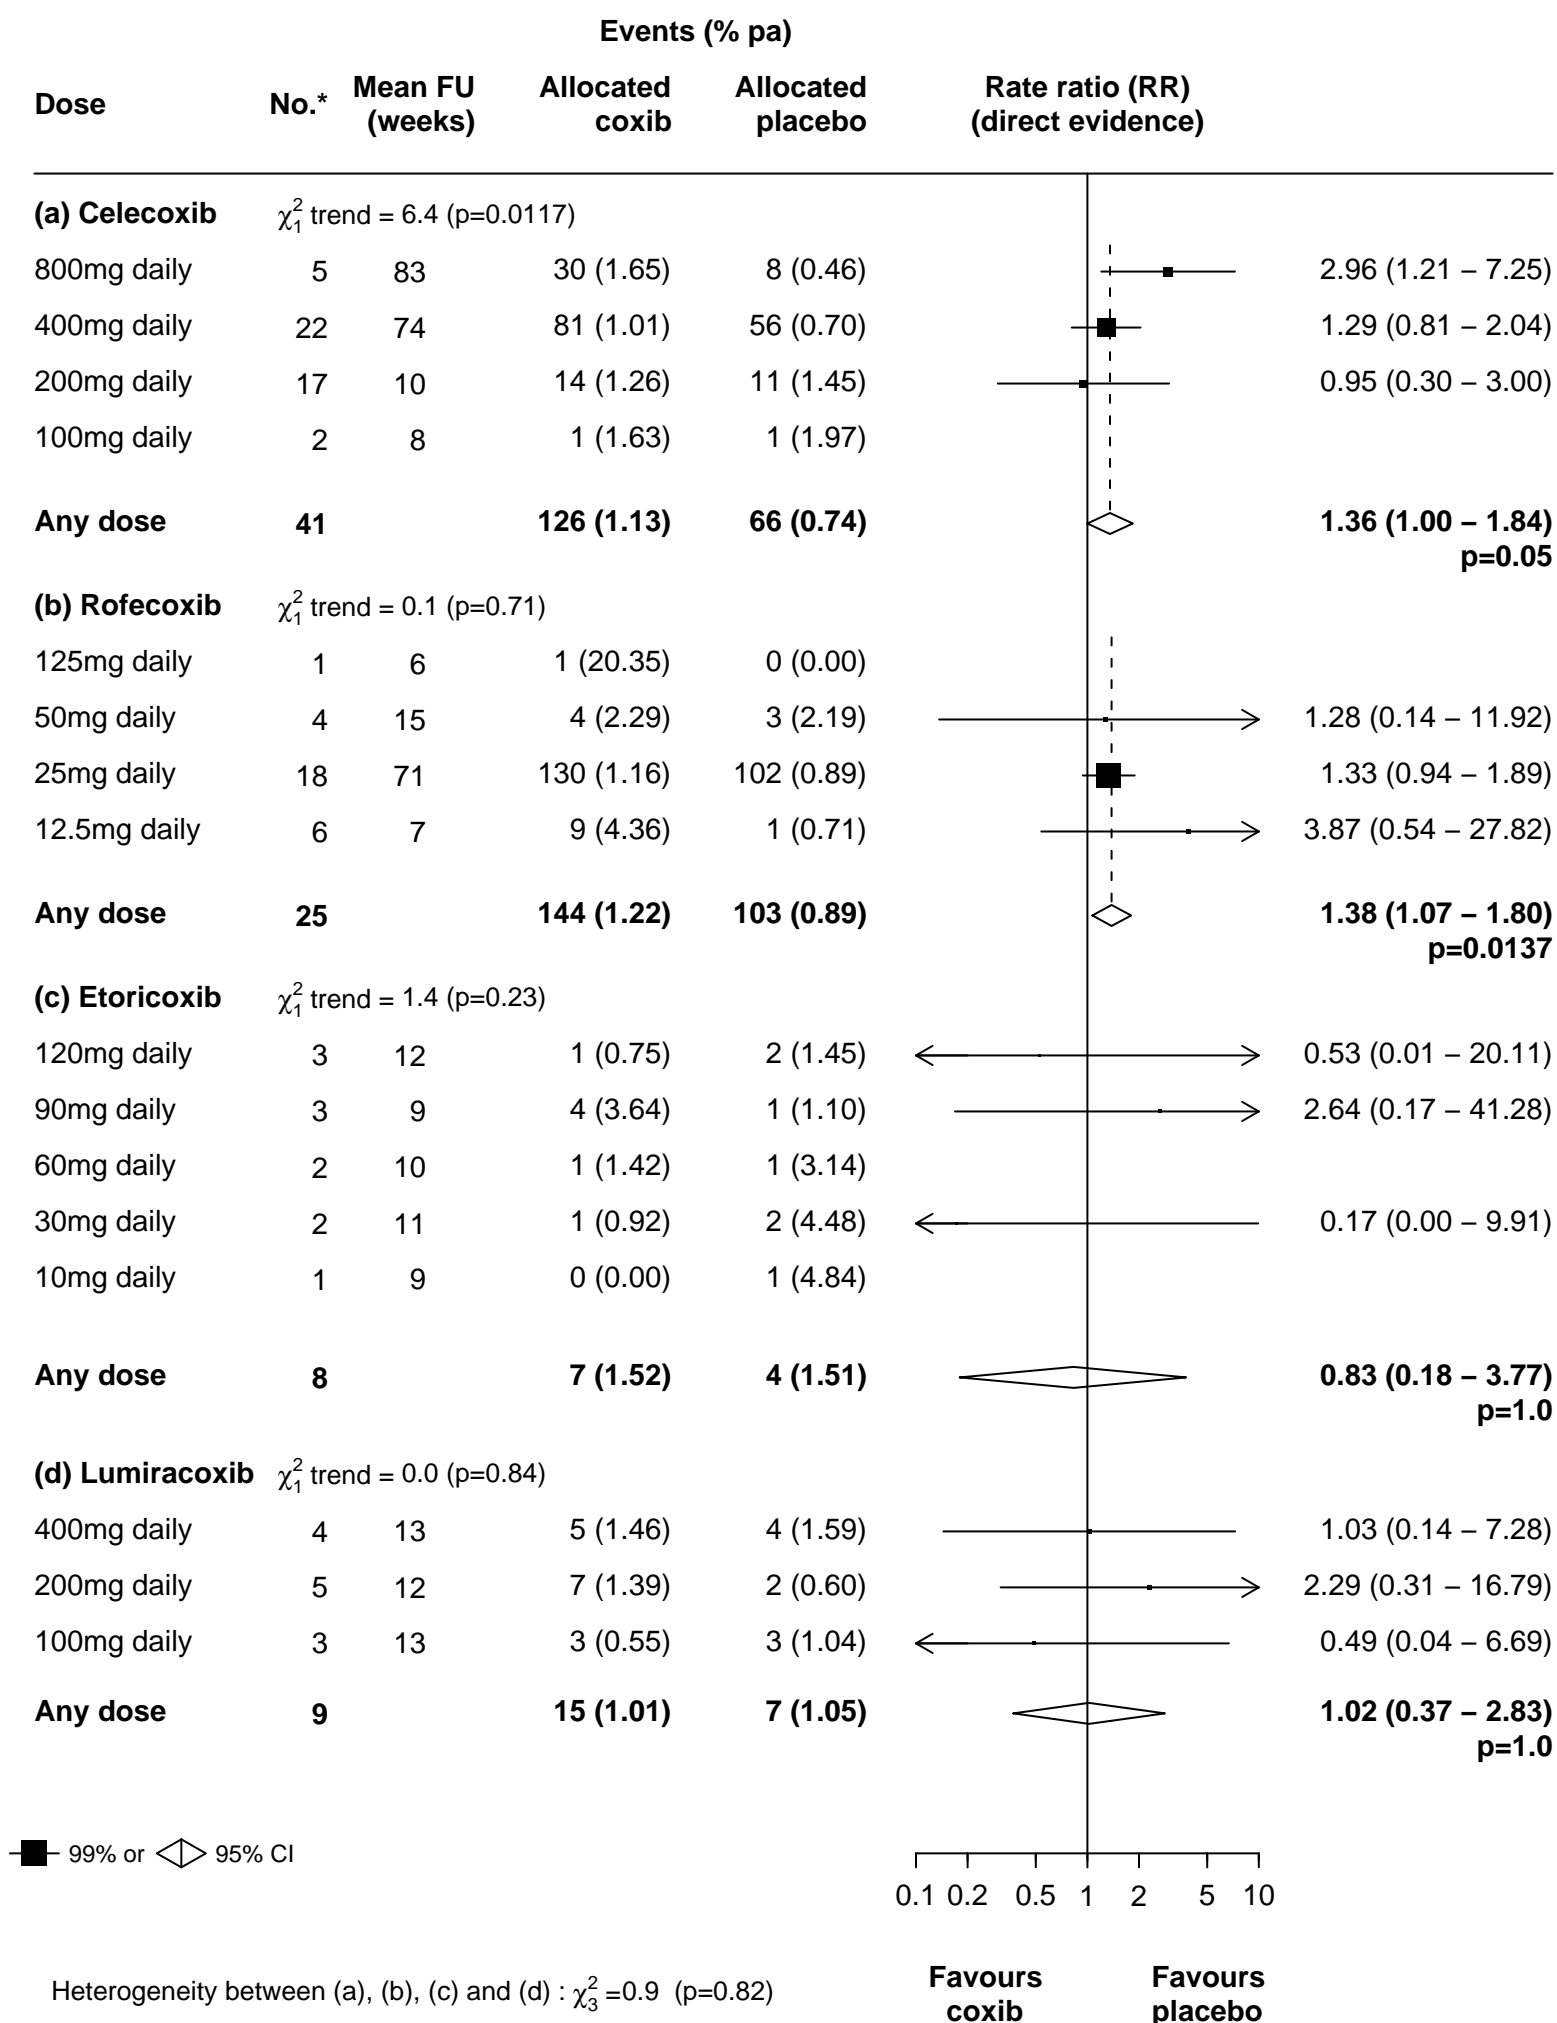

\* Number of comparisons with at least one event

**Webfigure 16: Effect of different coxib regimens on major vascular events, by dose: trials of a coxib vs diclofenac**

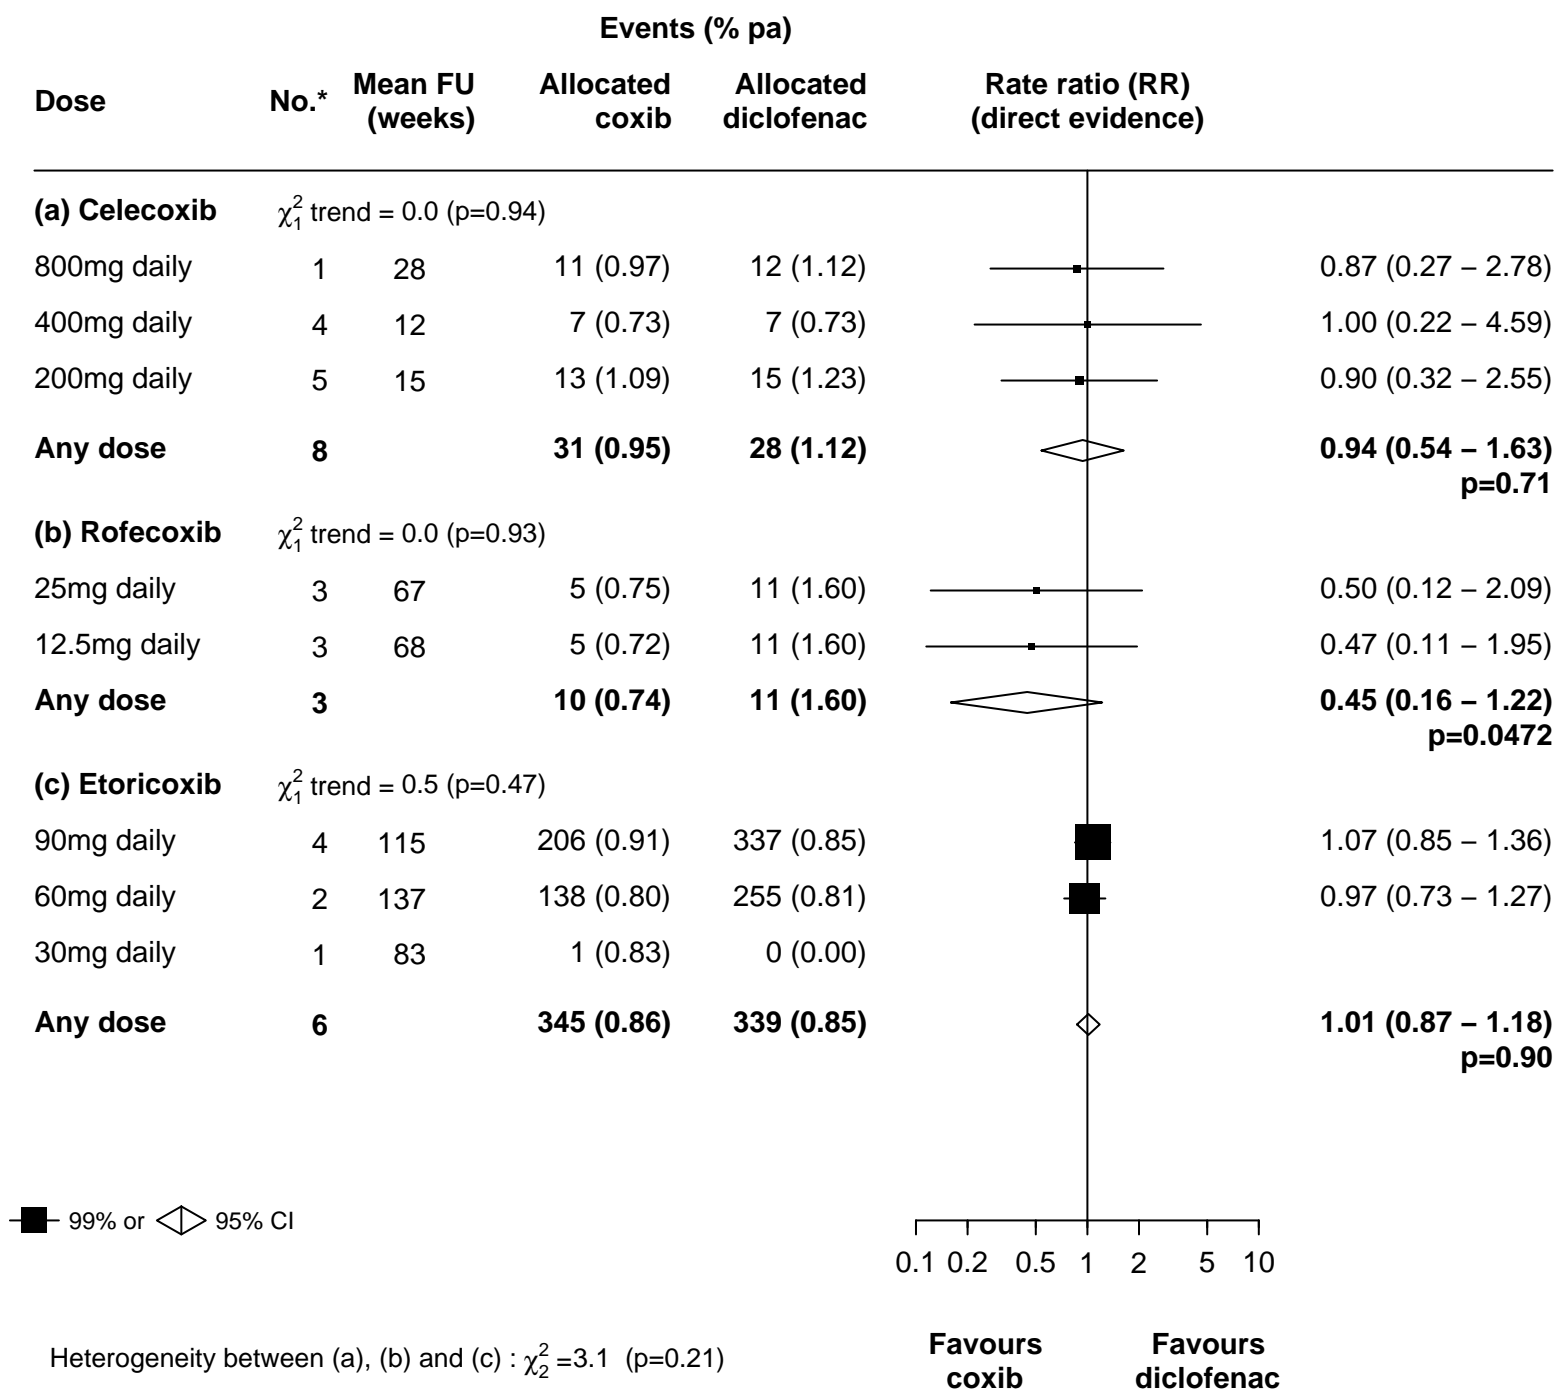

**Webfigure 17: Effect of different coxib regimens on major vascular events, by dose: trials of a coxib vs ibuprofen**

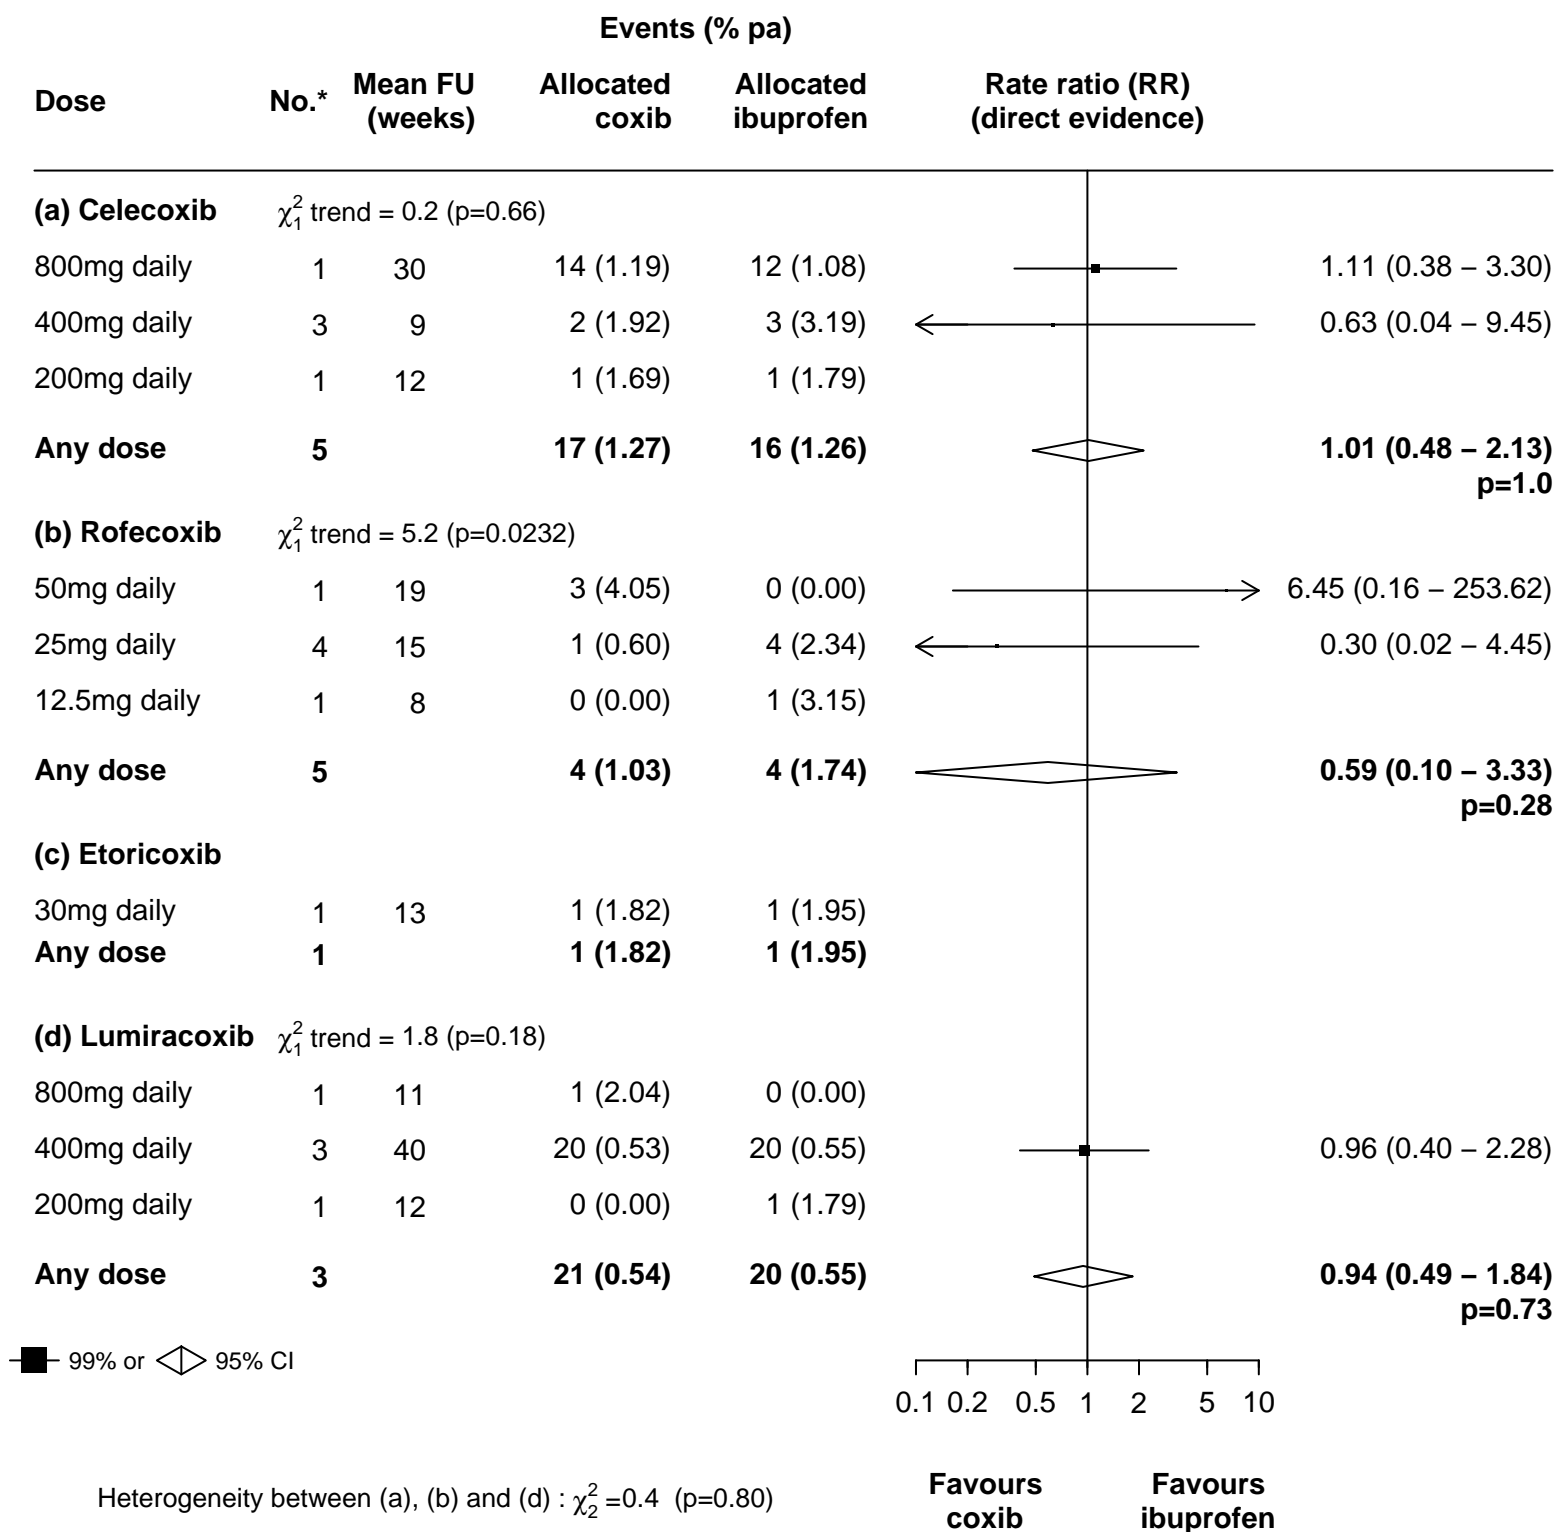

\* Number of comparisons with at least one event

**Webfigure 18: Effect of different coxib regimens on major vascular events, by dose: trials of a coxib vs naproxen**

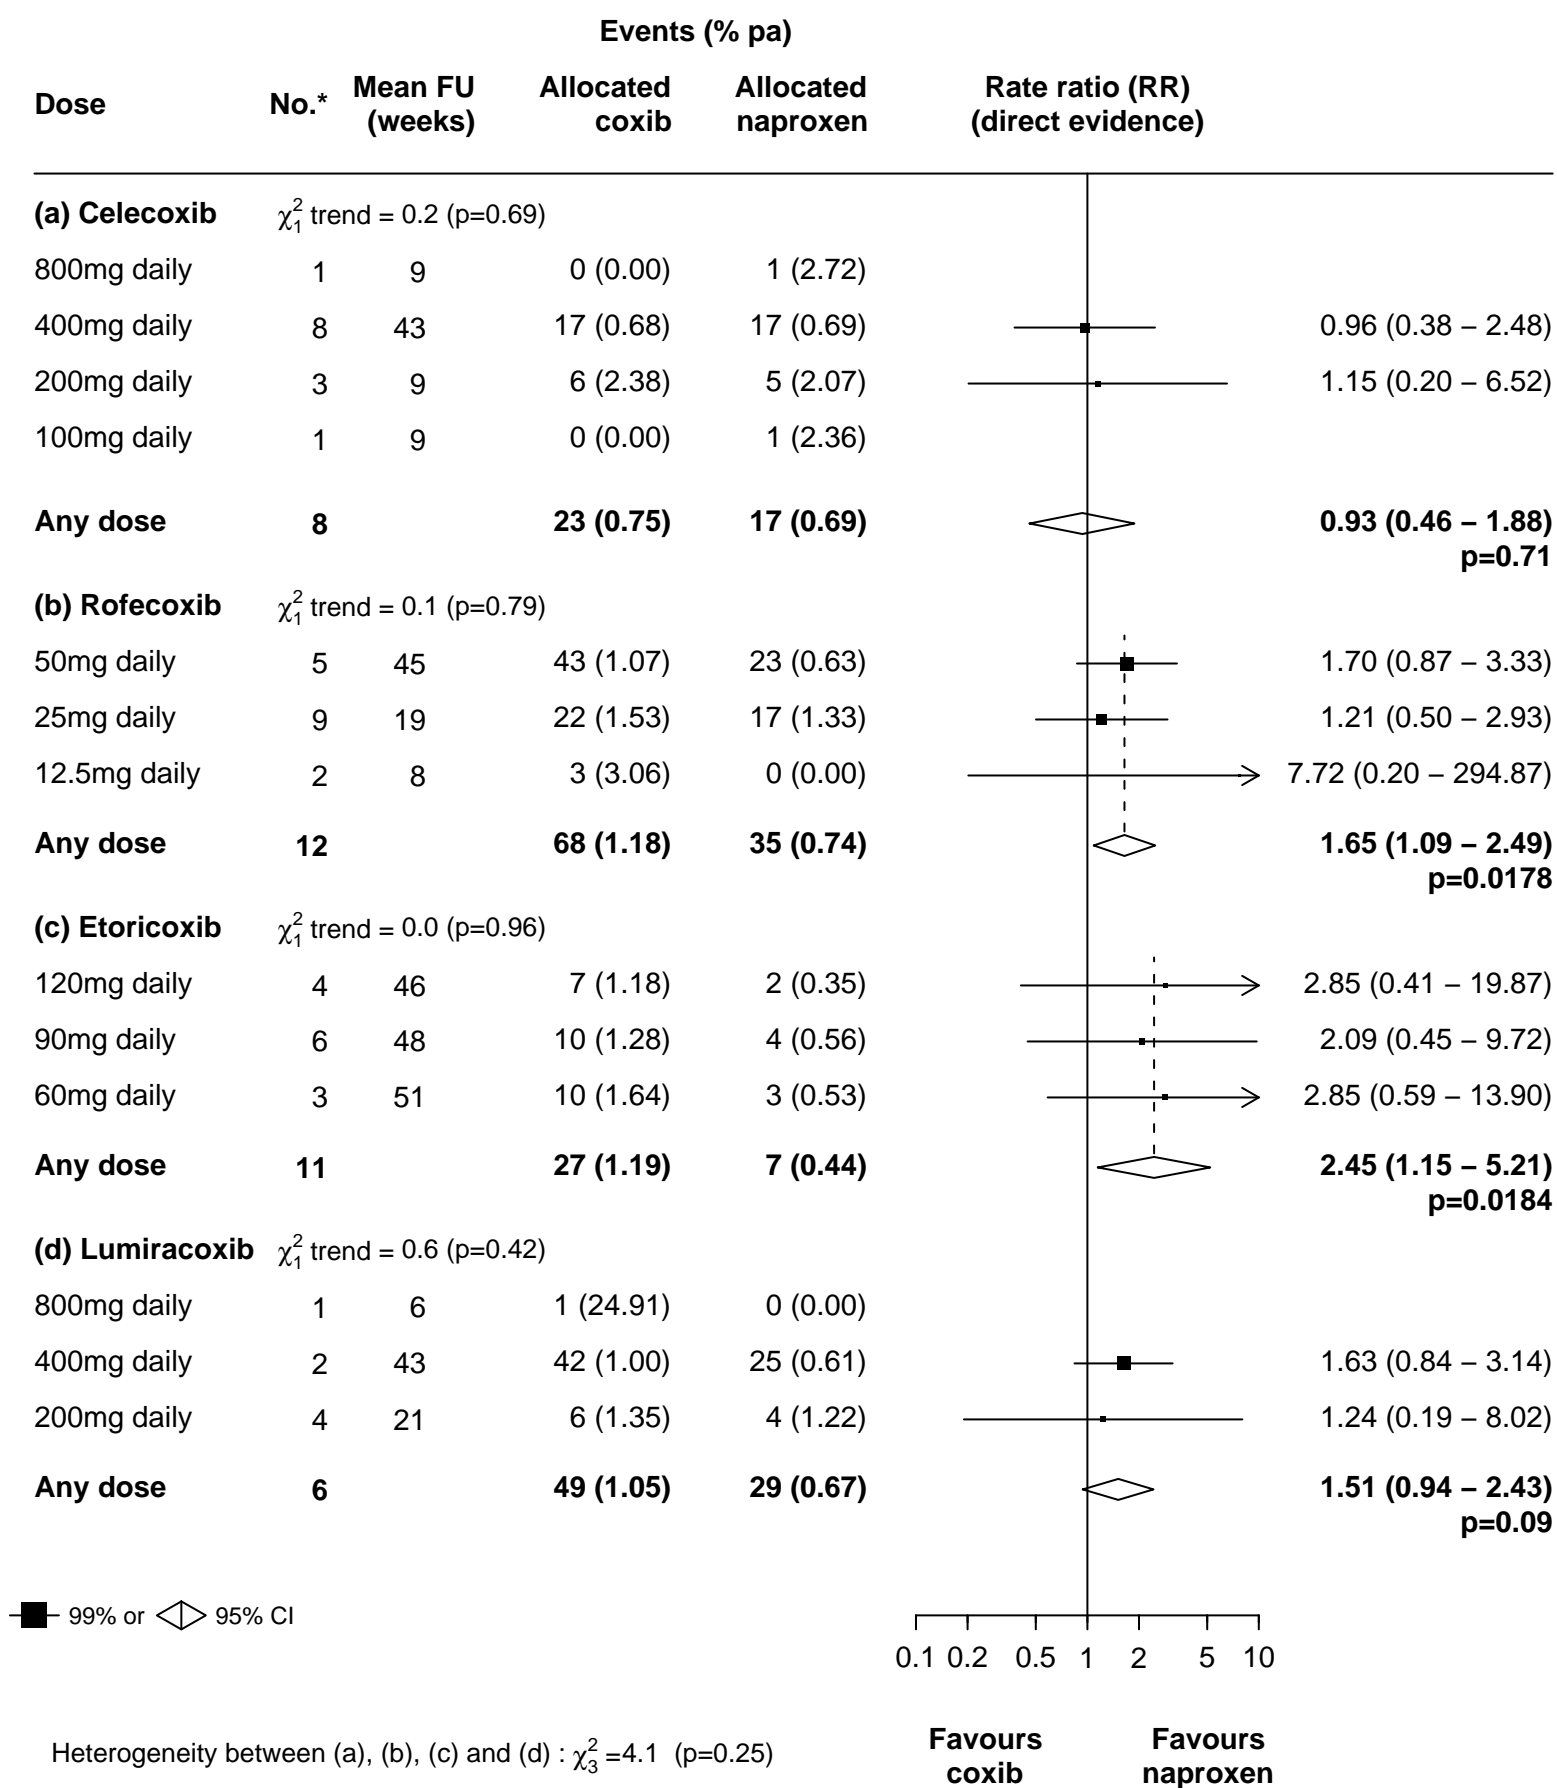

**Webfigure 19: Effect of coxib therapy on any symptomatic upper GI event, by type of coxib**

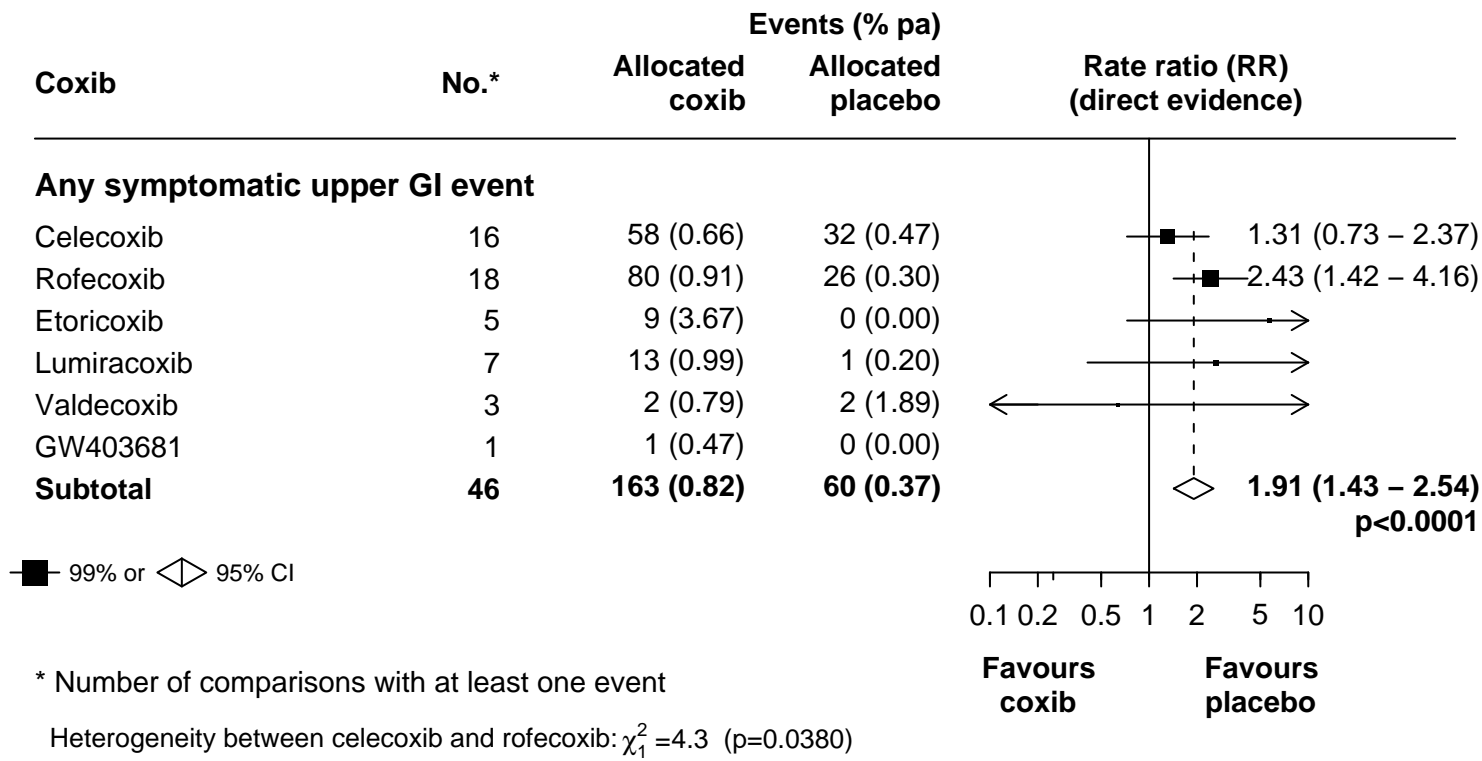



**Webfigure 20: Effect of different coxib regimens on any symptomatic upper GI event, by dose: trials of a coxib vs placebo**

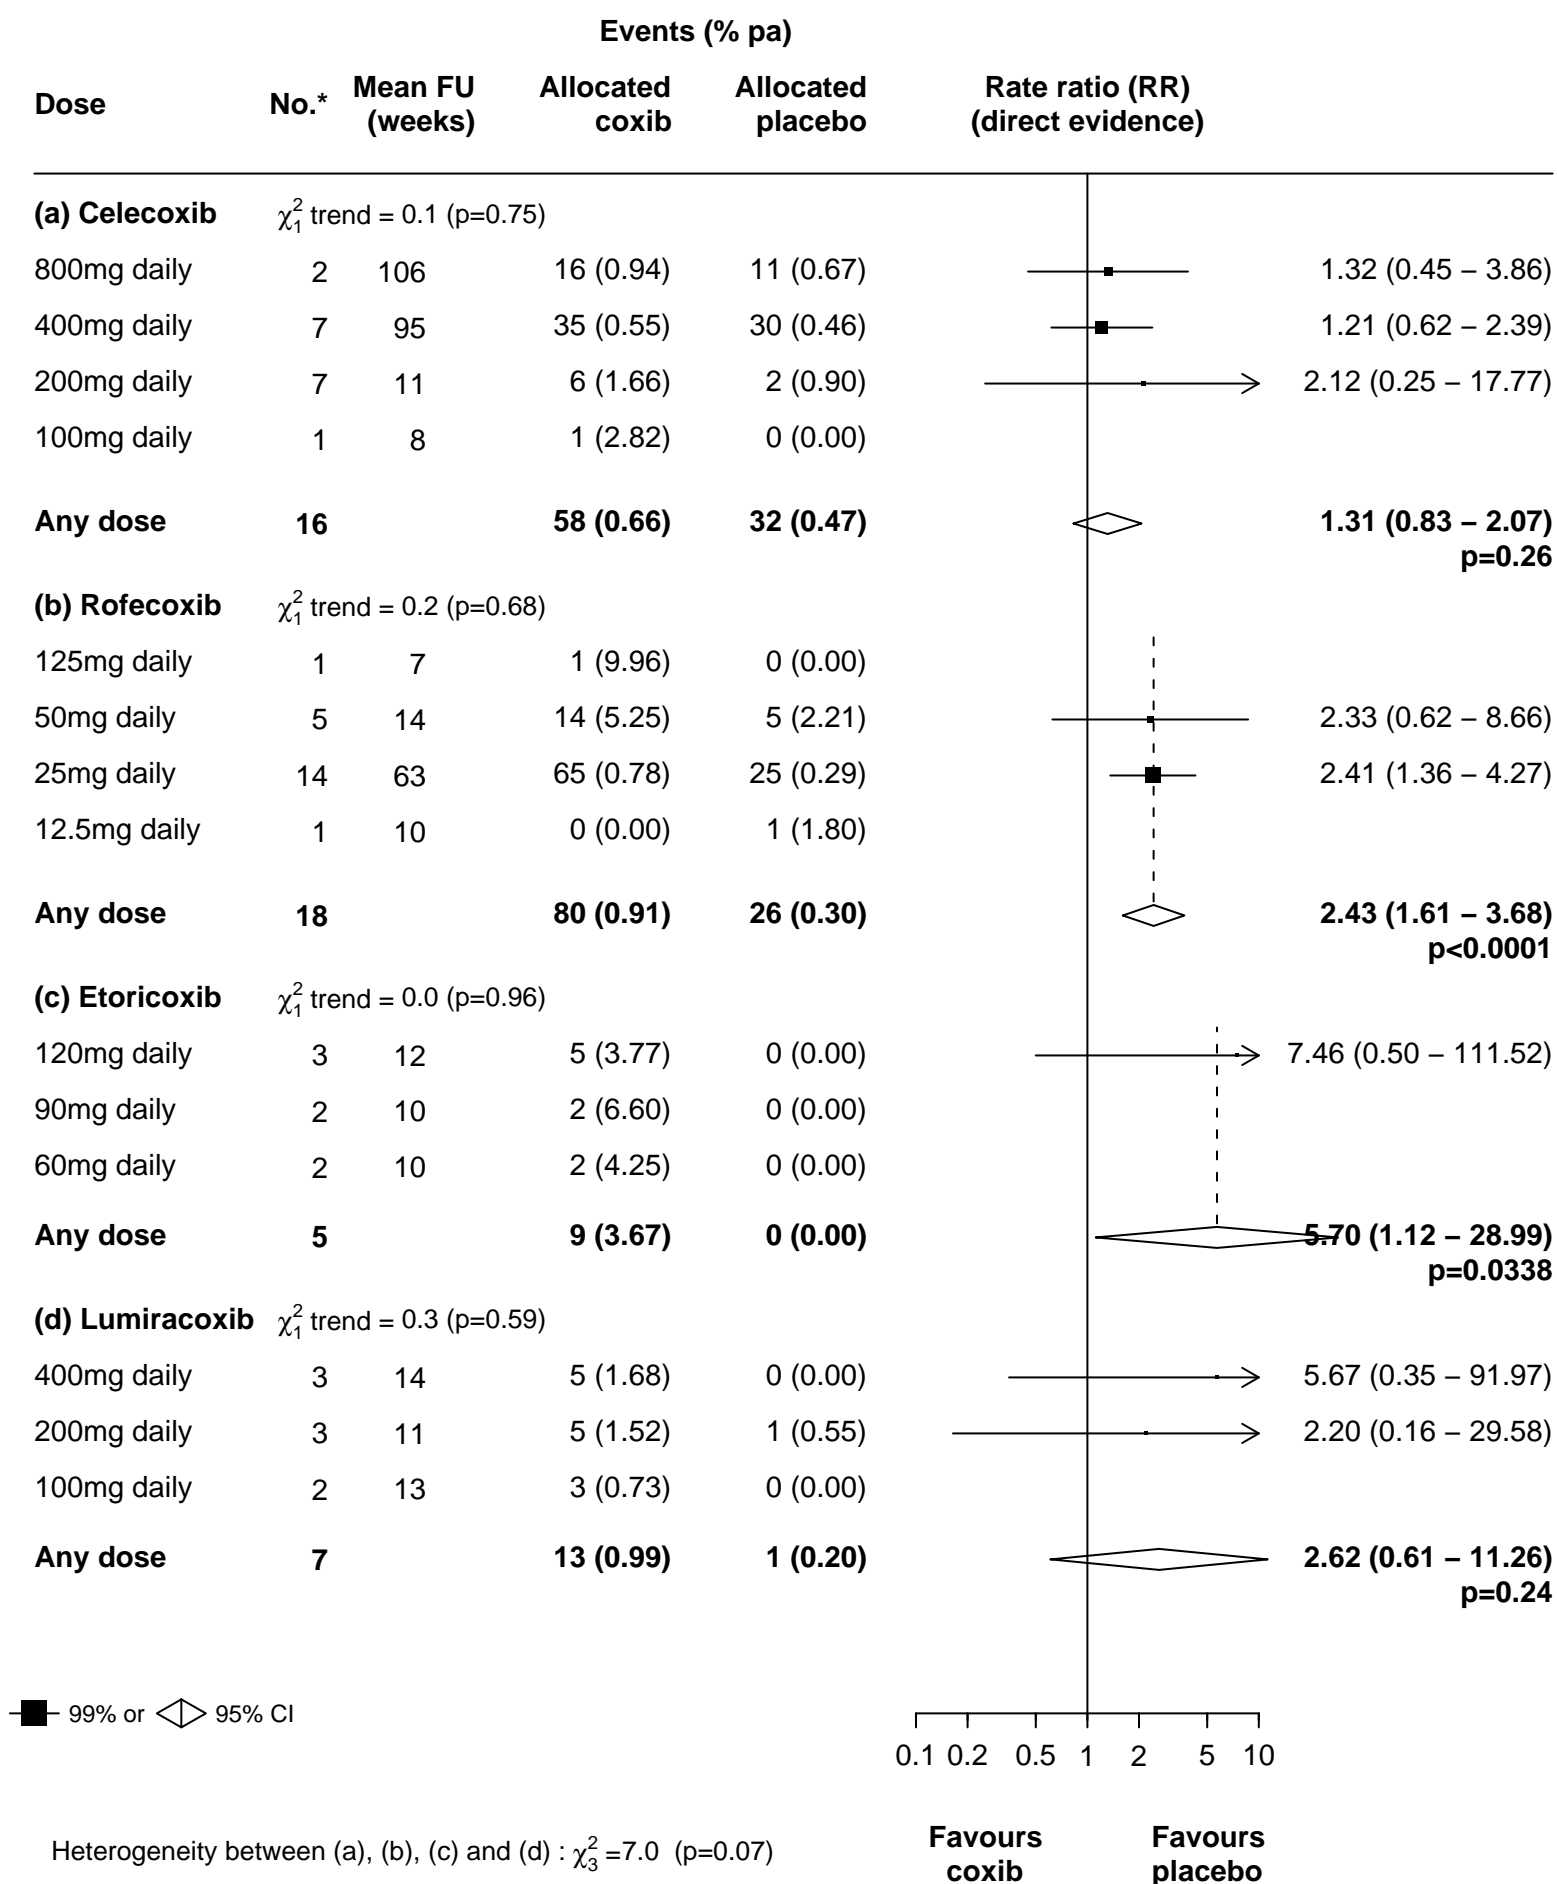

**Webfigure 21: Effect of different coxib regimens on any symptomatic upper GI event, by dose: trials of a coxib vs diclofenac**

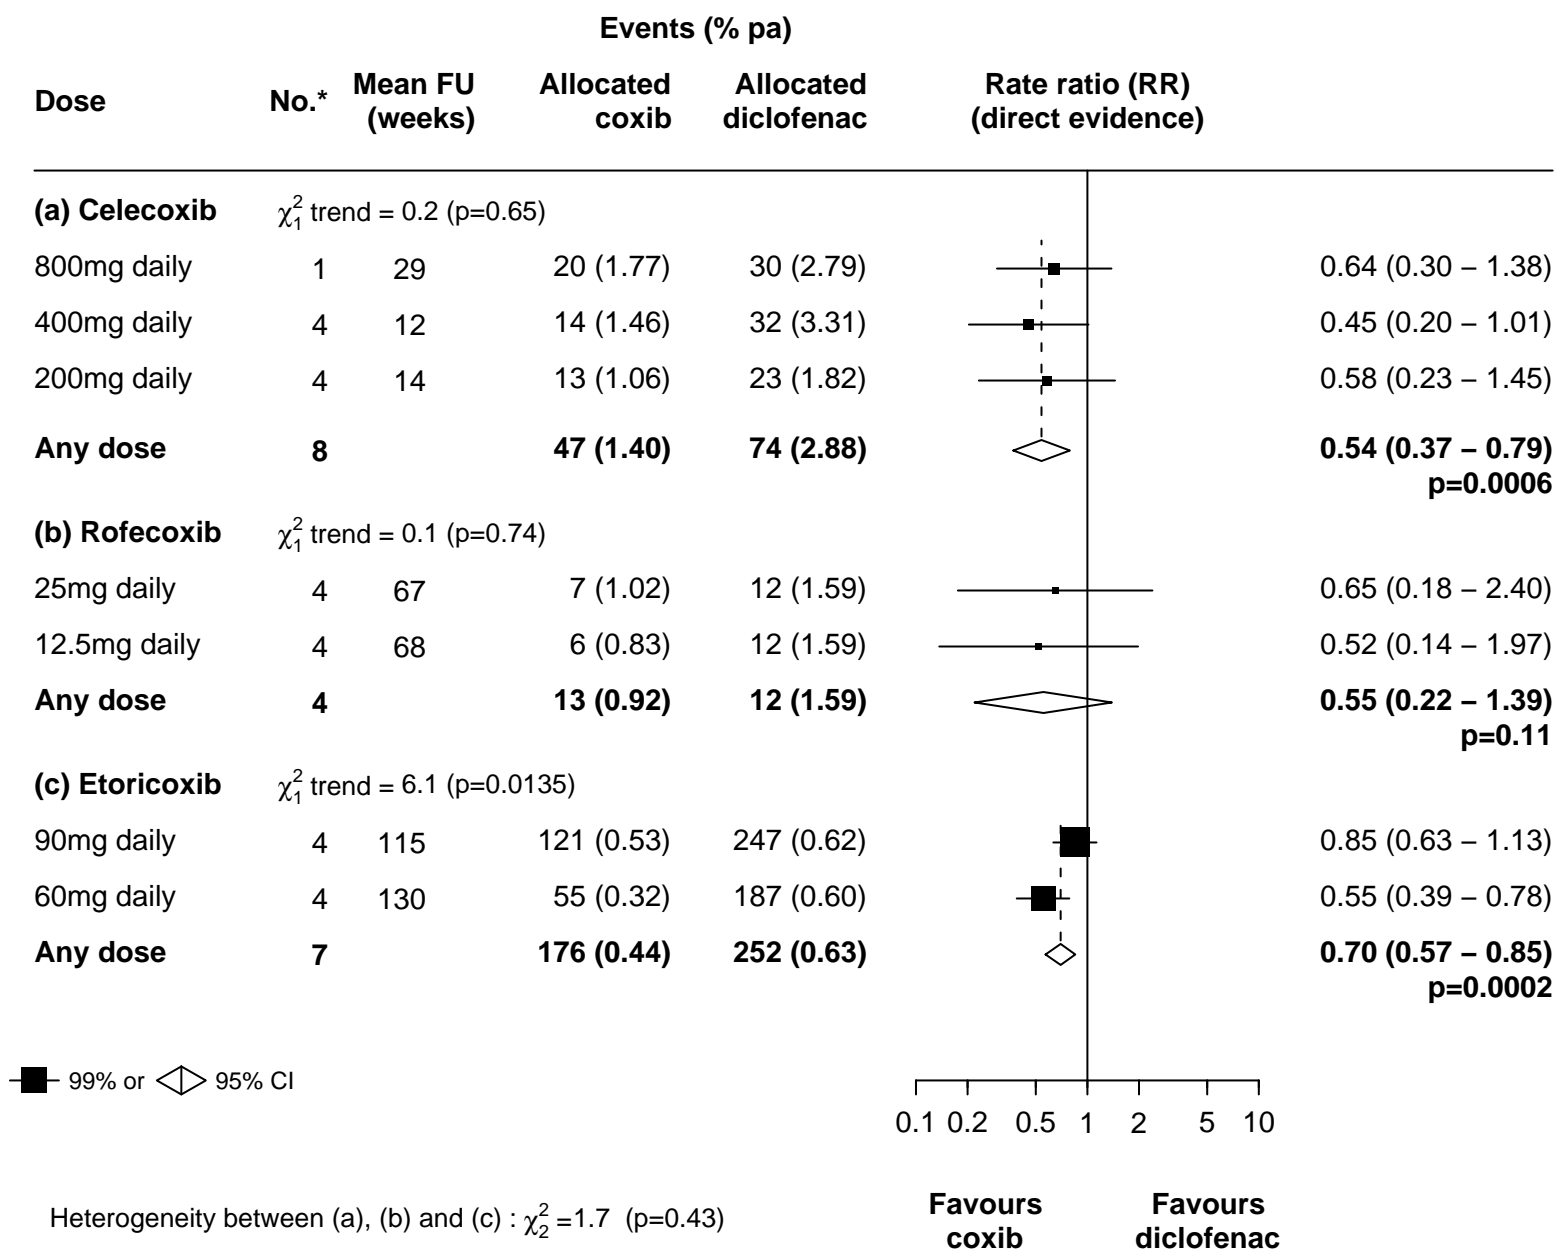

**Webfigure 22: Effect of different coxib regimens on any symptomatic upper GI event, by dose: trials of a coxib vs ibuprofen**

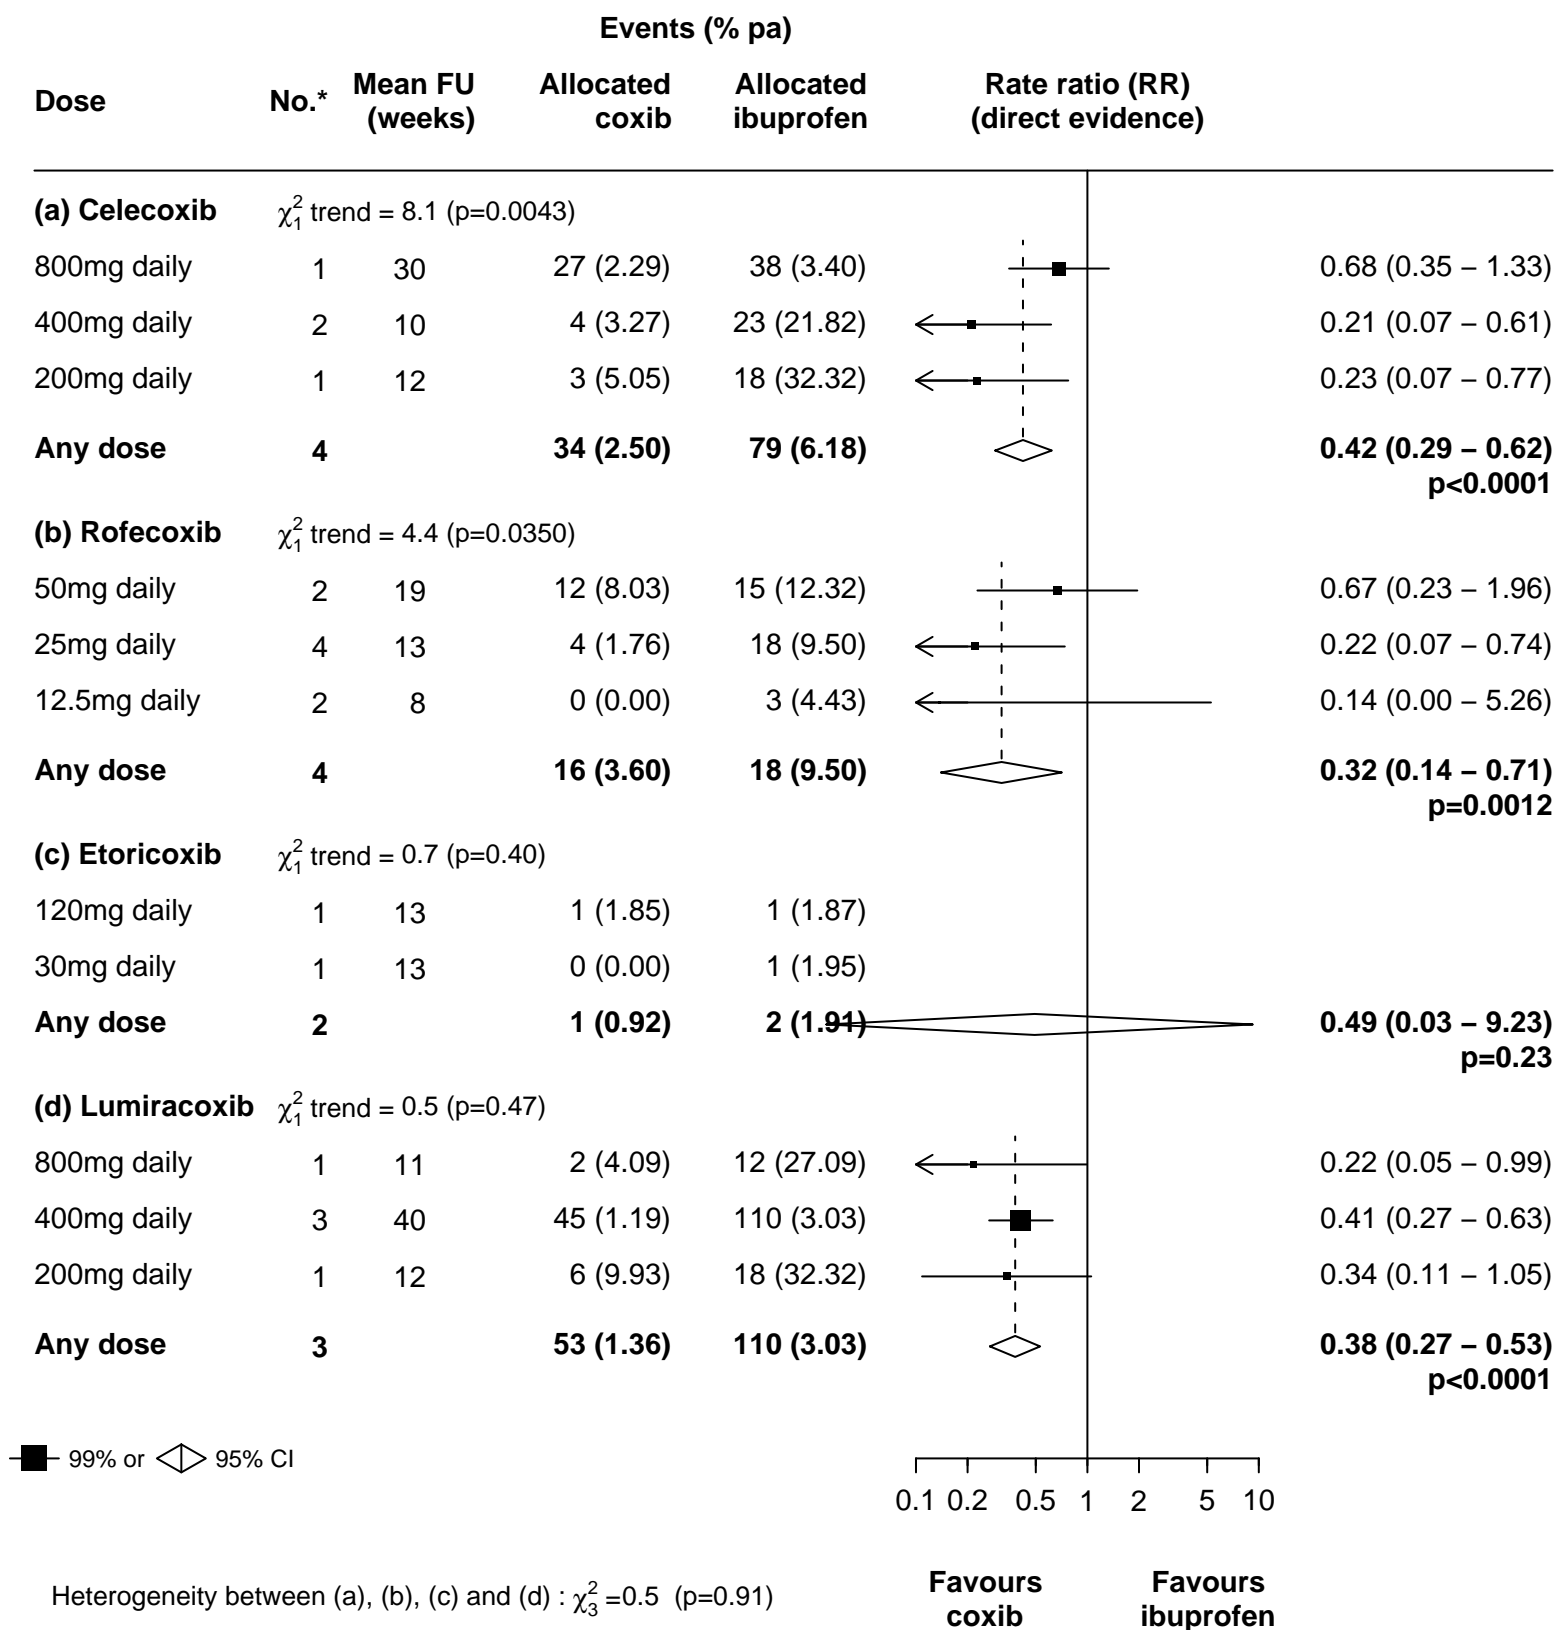

**Webfigure 23: Effect of different coxib regimens on any symptomatic upper GI event, by dose: trials of a coxib vs naproxen**

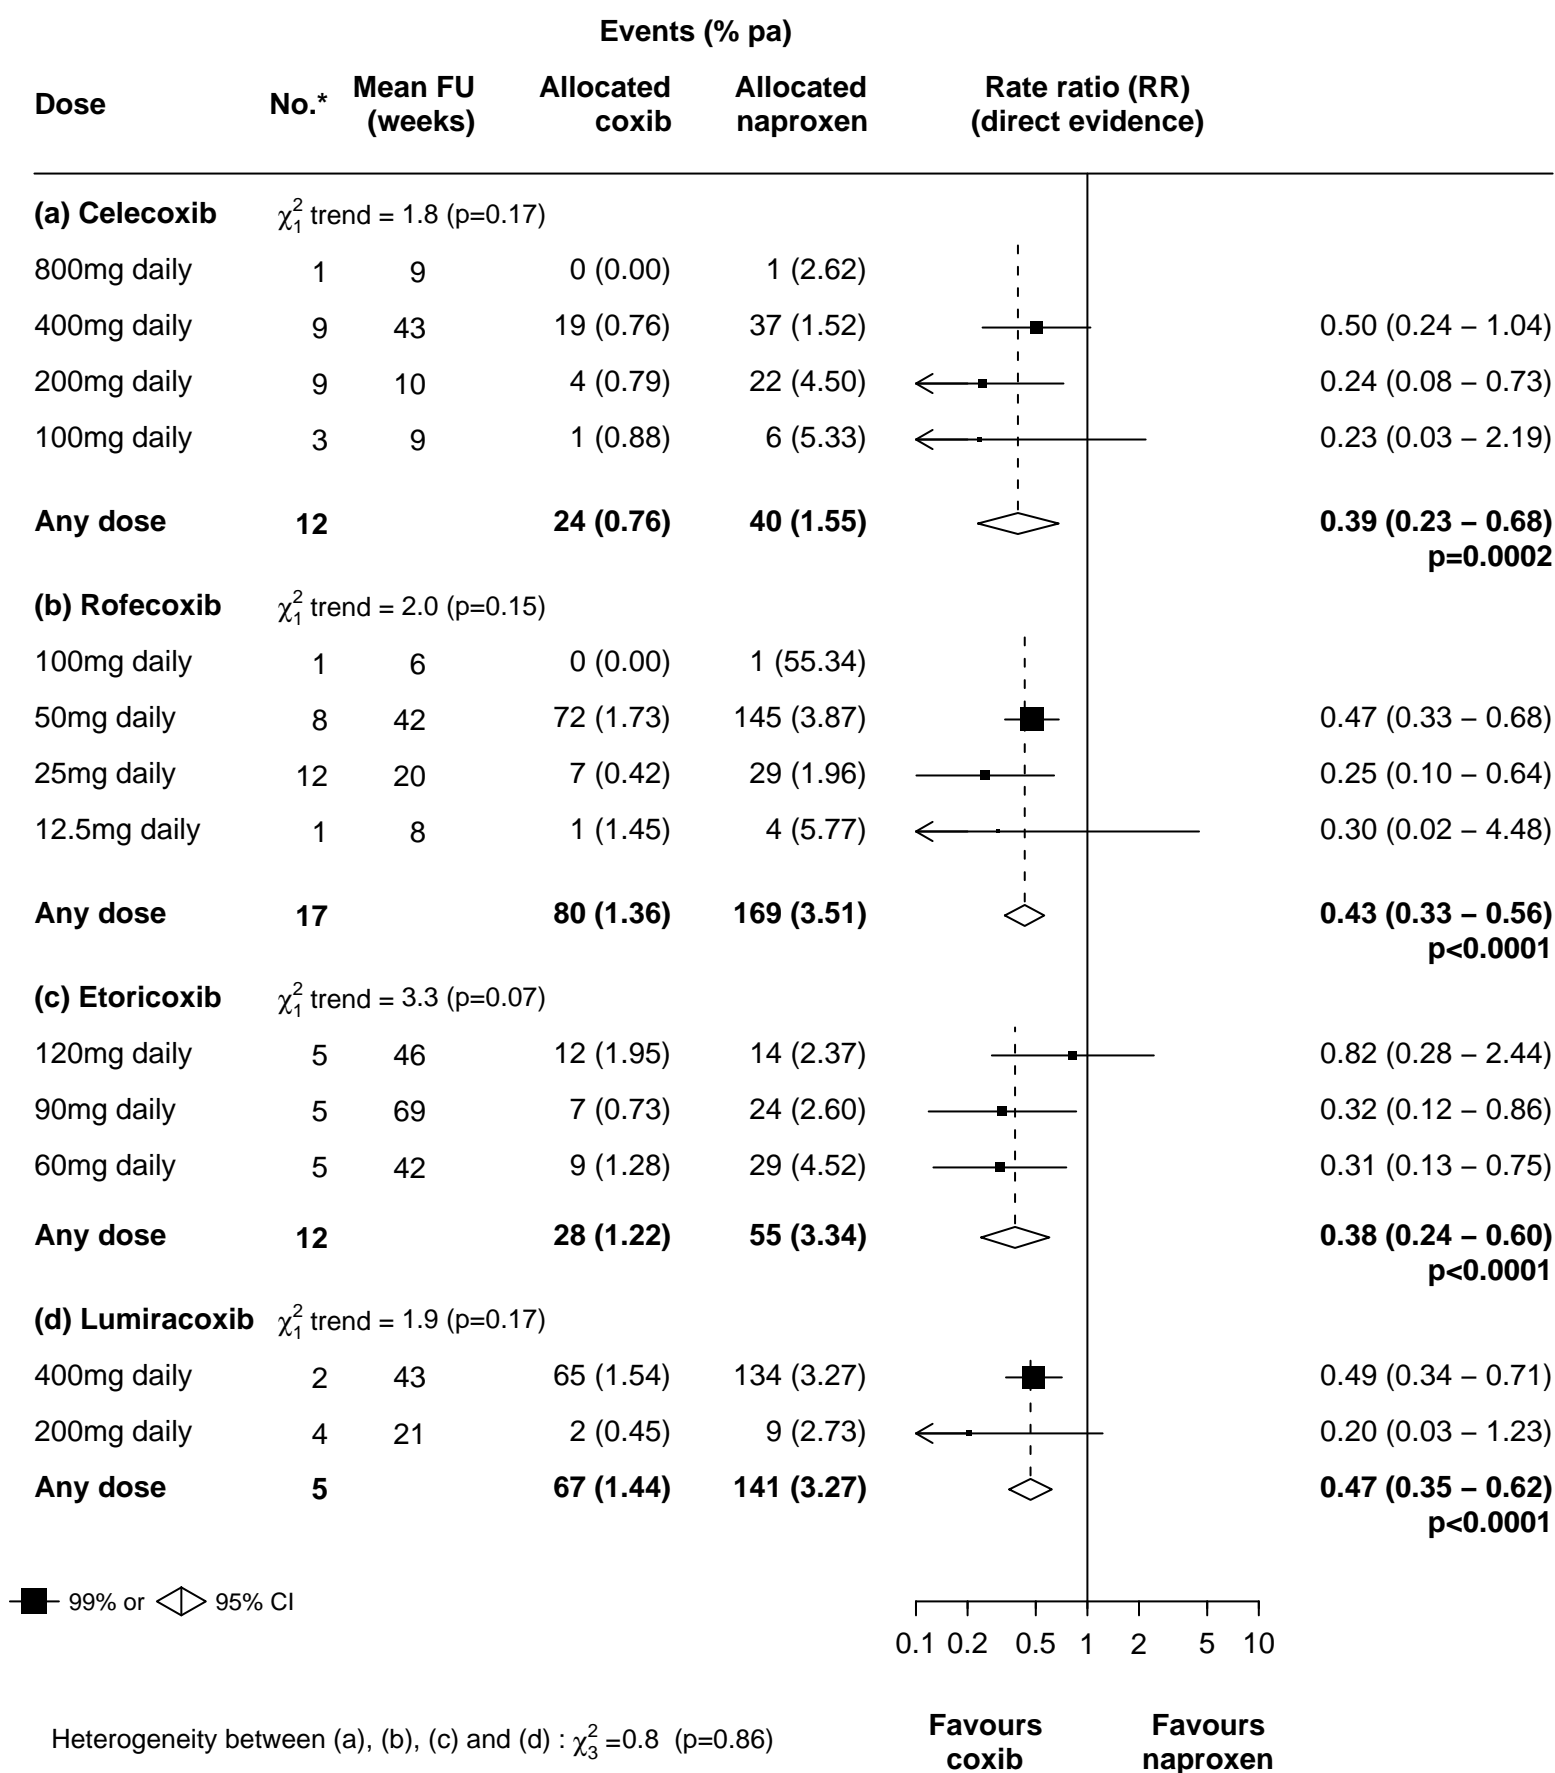

## Electronic Search Strategy

Medline (1946 - 1 January 2009) and EMBASE (1974 - 1 January 2009) were searched (using OVIDsp) for all trial publications (including protocols, results papers, abstracts, conference proceedings and reviews) by adapting the first Cochrane Search Strategy design (Dickersin 1994<sup>1</sup>). No language restrictions were applied to the search. Eligible studies were randomised trials of at least four weeks' daily treatment in which there was a comparison of a coxib versus placebo, a coxib versus tNSAID, one coxib versus another coxib, a dose-comparison of a particular coxib, tNSAID versus placebo, one tNSAID versus another tNSAID, or a dose comparison of a particular tNSAID. All trial participants were at least 18 years old at the point of randomization.

1. randomized controlled trial.mp. OR Randomized Controlled Trial/
2. controlled clinical trial.mp. OR Controlled Clinical Trial/
3. random allocation.mp. [mp=title, original title, abstract, name of substance word, subject heading word, unique identifier]
4. double-blind method.mp. OR Double-Blind Method/
5. single-blind method.mp. OR Single-Blind Method/
6. clinical trial.mp. OR Clinical Trial/
7. clinical trials.mp. OR Clinical Trial/
8. ((singl\$ OR doubl\$ OR trebl\$ OR tripl\$) adj (blind\$ OR mask\$)).ti.
9. ((singl\$ OR doubl\$ OR trebl\$ OR tripl\$) adj (blind\$ OR mask\$)).ab.
10. latin square.mp.
11. placebo\$.mp.
12. random\$.mp.
13. comparative study.mp.
14. evaluation studies.mp. OR Evaluation Studies/
15. prospective studies.mp. OR Prospective Studies/
16. follow-up studies.mp.
17. cross-over studies.mp. OR Cross-Over Studies/
18. Case-Control Studies/
  
19. 1 OR 2 OR 3 OR 4 OR 5 OR 6 OR 7 OR 8 OR 9 OR 10 OR 11 OR 12 OR 13 OR 14 OR 15 OR 16 OR 17 OR 18
  
20. celecoxib.mp. OR etoricoxib.mp. OR lumiracoxib.mp. OR parecoxib.mp. OR rofecoxib.mp. OR tiracoxib.mp. OR valdecoxib.mp. OR aceclofenac.mp. OR AZD3582.mp. OR alclofenac.mp. OR apazone.mp. OR benoxaprofen.mp. OR carprofen.mp. OR diclofenac.mp. OR diflunisal.mp. OR dipyron (metamizole).mp. OR etodolac.mp. OR fenbufen.mp. OR fenoprofen.mp. OR feprazone.mp. OR floctafenine.mp. OR flurbiprofen.mp. OR ibuprofen.mp. OR indobufen.mp. OR indomethacin.mp. OR isoxicam.mp. OR ketoprofen.mp. OR ketorolac.mp. OR lornoxicam.mp. OR meclofenamate.mp. OR meclofenamic acid.mp. OR mefenamic acid.mp. OR meloxicam.mp. OR nabumetone.mp. OR naproxen.mp. OR naproxcinod.mp. OR nimesulide.mp. OR oxyphenbutazone.mp. OR oxyprozin/oxaprozin.mp. OR phenylbutazone.mp. OR piroxicam.mp. OR piroprofen.mp. OR proquazone.mp. OR sulindac.mp. OR tenoxicam.mp. OR tiaprofenic acid.mp. OR tiroxicam.mp. OR tolfenamic acid.mp. OR tolmetin.mp.
  
21. 19 AND 20

Further drugs were identified during publication processing that were found to be suitable. Trials of these drugs were included: Amtolmetin, Droxicam, Fenclofenac, GW403681, Licofelone, Lonazolac, Loxoprofen, Proglumetacin and Suprofen.

In addition, [www.clinicalstudyresults.org](http://www.clinicalstudyresults.org) was searched and all four of the manufacturers of the different coxibs were contacted to provide information on all of their trials (both published and unpublished). To further ensure that no potentially eligible studies had been missed, reference lists of systematic reviews, meta-analyses and review articles were searched and contact was made with numerous experts in the field. Overall these searches resulted in 24,278 records to be examined, and all decisions on trial inclusion were reviewed by at least 2 authors.

1. *BMJ* 1994; 309 doi: <http://dx.doi.org/10.1136/bmj.309.6964.1286> (Published 12 November 1994)

## Statistical appendix

### 1. Poisson model for predicting risk of particular outcomes

For patient  $i$  in study  $j$ , let  $Y_{ij}$  denote the occurrence ( $Y_{ij} = 1$ ) or otherwise ( $Y_{ij} = 0$ ) of an outcome of interest (eg, major vascular event, upper GI ulcer) and let  $T_{ij}$  denote the number of years of follow-up (ie, time to event/censoring). Poisson regression was used to model the logarithm of the expected annual event rate as follows

$$\ln\left(\frac{E(Y_{ij})}{T_{ij}}\right) = x_{ij}^T \beta$$

where  $x_{ij}$  is the vector of baseline characteristics for patient  $i$  in study  $j$  and  $\beta$  is the vector of unknown regression coefficients associated with the individual baseline characteristics. For each patient, the baseline predicted 5-year probability of the outcome was then estimated by:

$$P_{ij} = 1 - (1 - \exp(x_{ij}^T \hat{\beta}))^5$$

Patients were then separated into three baseline risk groups (5-year risk <5%, 5%-10%, >10%) for both their predicted risk of a major vascular event and their predicted risk of a symptomatic upper gastrointestinal event.

### 2. Calculation of annual absolute excess risks for particular outcomes

The annual excess risk of a primary outcome per 1000 attributable to an NSAID in a patient with a given annual probability ( $p_0$ ) of that outcome (in the absence of any NSAID regimen) was calculated as  $1000 \times (p_1 - p_0)$ , where:

$$p_1 = 1 - \frac{1 - p_0}{rp_0 + (1 - p_0)}$$

and  $r$  is the estimated odds ratio (approximately the same as the rate ratio for rare outcomes) for NSAID versus placebo.
